# Supplementary material for: Interactions of limonene with the water dimer
Source: Royal Society of Chemistry journal article supplement (doi:10.1039/d2cp04174j), 2022-01-01
Supplement: d2cp04174j1.pdf [file d2cp04174j1.pdf]

## **Interactions of limonene with the water dimer**

S. Indira Murugachandran, M. Eugenia Sanz\*

Department of Chemistry, King's College London, London SE1 1DB, UK

### **Supplementary Information**

## TABLE OF CONTENTS

|                                                                                                                                                                                                                                                                              |    |
|------------------------------------------------------------------------------------------------------------------------------------------------------------------------------------------------------------------------------------------------------------------------------|----|
| <b>Table S1.</b> Calculated spectroscopic parameters for the isomers of limonene-(H <sub>2</sub> O) <sub>2</sub> at B3LYP-D3BJ/6-311++G(d,p) and MP2/6-311++G(d,p) levels of theory within 4 kJ mol <sup>-1</sup> .....                                                      | 5  |
| <b>Table S1 (cont.)</b> .....                                                                                                                                                                                                                                                | 6  |
| <b>Table S1 (cont.)</b> .....                                                                                                                                                                                                                                                | 7  |
| <b>Table S1 (cont.)</b> .....                                                                                                                                                                                                                                                | 8  |
| <b>Table S2.</b> Calculated spectroscopic parameters for the lower-energy isomers of limonene-(H <sub>2</sub> O) <sub>2</sub> at M062X/6-311++G(d,p) level of theory.....                                                                                                    | 9  |
| <b>Table S3.</b> Calculated spectroscopic parameters for the lower-energy isomers of limonene-(H <sub>2</sub> O) <sub>2</sub> at wb97XD/6-311++G(d,p) level of theory.....                                                                                                   | 10 |
| <b>Table S4.</b> Calculated spectroscopic parameters for the lower-energy isomers of limonene-(H <sub>2</sub> O) <sub>2</sub> at B2PLYP-D3BJ/def2-TZVP level of theory.....                                                                                                  | 11 |
| <b>Table S5.</b> Experimental spectroscopic parameters for the isotopic species of <b>isomer 1 / EQA-3-II</b> .....                                                                                                                                                          | 12 |
| <b>Table S6.</b> Experimental spectroscopic parameters for the isotopic species of <b>isomer 2 / EQA-4-II</b> .....                                                                                                                                                          | 12 |
| <b>Table S7.</b> Experimental spectroscopic parameters for the isotopic species of <b>isomer 3 / EQC-4-I</b> .....                                                                                                                                                           | 12 |
| <b>Table S8.</b> Experimental spectroscopic parameters for the isotopic species of <b>isomer 4 / EQC-1-I</b> .....                                                                                                                                                           | 12 |
| <b>Table S9.</b> Experimental spectroscopic parameters for the isotopic species of <b>isomer 5 / EQC-2-I</b> .....                                                                                                                                                           | 12 |
| <b>Table S10.</b> Experimental spectroscopic parameters for the isotopic species of <b>isomer 6 / EQa-4-I</b> .....                                                                                                                                                          | 13 |
| <b>Table S11.</b> Experimental spectroscopic parameters for the isotopic species of <b>isomer 7 / EQA-2-I</b> .....                                                                                                                                                          | 13 |
| <b>Table S12.</b> Experimental coordinates of the water oxygen atoms for the observed limonene-(H <sub>2</sub> O) <sub>2</sub> complexes compared with possible equilibrium structures from MP2 and B3LYP-D3BJ calculations using the 6-311++G(d,p) basis set. ....          | 14 |
| <b>Table S12 (cont.)</b> . Experimental coordinates of the water oxygen atoms for the observed limonene-(H <sub>2</sub> O) <sub>2</sub> complexes compared with possible equilibrium structures from MP2 and B3LYP-D3BJ calculations using the 6-311++G(d,p) basis set. .... | 15 |
| <b>Table S13.</b> Intermolecular stabilising energy contributions (≥0.42 kJ mol <sup>-1</sup> ) for <b>isomer 1 / EQA-3-II</b> of limonene-(H <sub>2</sub> O) <sub>2</sub> from Natural Bond Orbital (NBO) analysis at the B3LYP-D3BJ/6-311++G(d,p) level of theory. ....    | 16 |
| <b>Table S14.</b> Intermolecular stabilising energy contributions (≥0.42 kJ mol <sup>-1</sup> ) for <b>isomer 2 / EQA-4-II</b> of limonene-(H <sub>2</sub> O) <sub>2</sub> from Natural Bond Orbital (NBO) analysis at the B3LYP-D3BJ/6-311++G(d,p) level of theory. ....    | 17 |
| <b>Table S15.</b> Intermolecular stabilising energy contributions (≥0.42 kJ mol <sup>-1</sup> ) for <b>isomer 3 / EQC-4-I</b> of limonene-(H <sub>2</sub> O) <sub>2</sub> from Natural Bond Orbital (NBO) analysis at the B3LYP-D3BJ/6-311++G(d,p) level of theory. ....     | 18 |
| <b>Table S16.</b> Intermolecular stabilising energy contributions (≥0.42 kJ mol <sup>-1</sup> ) for <b>isomer 4 / EQC-1-I</b> of limonene-(H <sub>2</sub> O) <sub>2</sub> from Natural Bond Orbital (NBO) analysis at the B3LYP-D3BJ/6-311++G(d,p) level of theory. ....     | 19 |
| <b>Table S17.</b> Intermolecular stabilising energy contributions (≥0.42 kJ mol <sup>-1</sup> ) for <b>isomer 5 / EQC-2-I</b> of limonene-(H <sub>2</sub> O) <sub>2</sub> from Natural Bond Orbital (NBO) analysis at the B3LYP-D3BJ/6-311++G(d,p) level of theory. ....     | 20 |
| <b>Table S18.</b> Intermolecular stabilising energy contributions (≥0.42 kJ mol <sup>-1</sup> ) for <b>isomer 6 / EQa-4-I</b> of limonene-(H <sub>2</sub> O) <sub>2</sub> from Natural Bond Orbital (NBO) analysis at the B3LYP-D3BJ/6-311++G(d,p) level of theory. ....     | 21 |
| <b>Table S19.</b> Intermolecular stabilising energy contributions (≥0.42 kJ mol <sup>-1</sup> ) for <b>isomer 7 / EQA-2-I</b> of limonene-(H <sub>2</sub> O) <sub>2</sub> from Natural Bond Orbital (NBO) analysis at the B3LYP-D3BJ/6-311++G(d,p) level of theory. ....     | 22 |
| <b>Figure S1.</b> Plots of the reduced density gradient (RDG) versus sign(λ <sub>2</sub> )ρ for the observed isomers of limonene-(H <sub>2</sub> O) <sub>2</sub> .....                                                                                                       | 23 |
| <b>Table S20.</b> Cartesian coordinates of <b>isomer 1 / EQA-3-II</b> from B3LYP-D3BJ/6-311++G(d,p) calculations.....                                                                                                                                                        | 26 |
| <b>Table S21.</b> Cartesian coordinates of <b>isomer 2 / EQA-4-II</b> from B3LYP-D3BJ/6-311++G(d,p) calculations.....                                                                                                                                                        | 27 |

|                                                                                                                                                                                                                        |    |
|------------------------------------------------------------------------------------------------------------------------------------------------------------------------------------------------------------------------|----|
| <b>Table S22.</b> Cartesian coordinates of <b>isomer 3 / EQC-4-I</b> from B3LYP-D3BJ/6-311++G(d,p) calculations. ....                                                                                                  | 28 |
| <b>Table S23.</b> Cartesian coordinates of <b>isomer 4 / EQC-1-I</b> from B3LYP-D3BJ/6-311++G(d,p) calculations. ....                                                                                                  | 29 |
| <b>Table S24.</b> Cartesian coordinates of <b>isomer 5 / EQC-2-I</b> from B3LYP-D3BJ/6-311++G(d,p) calculations. ....                                                                                                  | 30 |
| <b>Table S25.</b> Cartesian coordinates of <b>isomer 6 / EQa-4-I</b> from B3LYP-D3BJ/6-311++G(d,p) calculations. ....                                                                                                  | 31 |
| <b>Table S26.</b> Cartesian coordinates of <b>isomer 7 / EQA-2-I</b> from B3LYP-D3BJ/6-311++G(d,p) calculations. ....                                                                                                  | 32 |
| <b>Table S27.</b> Measured frequencies and residuals (in MHz) of the rotational transitions of the parent species of <b>isomer 1 / EQA-3-II</b> . ....                                                                 | 33 |
| <b>Table S28.</b> Measured frequencies and residuals (in MHz) of the rotational transitions of the (H <sub>2</sub> <sup>18</sup> O)(H <sub>2</sub> <sup>16</sup> O) isotopologue of <b>isomer 1 / EQA-3-II</b> . ....  | 34 |
| <b>Table S29.</b> Measured frequencies and residuals (in MHz) of the rotational transitions of the (H <sub>2</sub> <sup>16</sup> O) (H <sub>2</sub> <sup>18</sup> O) isotopologue of <b>isomer 1 / EQA-3-II</b> . .... | 35 |
| <b>Table S30.</b> Measured frequencies and residuals (in MHz) of the rotational transitions of the (H <sub>2</sub> <sup>18</sup> O) (H <sub>2</sub> <sup>18</sup> O) isotopologue of <b>isomer 1 / EQA-3-II</b> . .... | 36 |
| <b>Table S31.</b> Measured frequencies and residuals (in MHz) of the rotational transitions of the parent species of <b>isomer 2 / EQA-4-II</b> . ....                                                                 | 37 |
| <b>Table S32.</b> Measured frequencies and residuals (in MHz) of the rotational transitions of the (H <sub>2</sub> <sup>18</sup> O)(H <sub>2</sub> <sup>16</sup> O) isotopologue of <b>isomer 2 / EQA-4-II</b> . ....  | 39 |
| <b>Table S33.</b> Measured frequencies and residuals (in MHz) of the rotational transitions of the (H <sub>2</sub> <sup>16</sup> O) (H <sub>2</sub> <sup>18</sup> O) isotopologue of <b>isomer 2 / EQA-4-II</b> . .... | 40 |
| <b>Table S34.</b> Measured frequencies and residuals (in MHz) of the rotational transitions of the (H <sub>2</sub> <sup>18</sup> O) (H <sub>2</sub> <sup>18</sup> O) isotopologue of <b>isomer 2 / EQA-4-II</b> . .... | 41 |
| <b>Table S35.</b> Measured frequencies and residuals (in MHz) of the rotational transitions of the parent species of <b>isomer 3 / EQC-4-I</b> . ....                                                                  | 42 |
| <b>Table S36.</b> Measured frequencies and residuals (in MHz) of the rotational transitions of the (H <sub>2</sub> <sup>18</sup> O)(H <sub>2</sub> <sup>16</sup> O) isotopologue of <b>isomer 3 / EQC-4-I</b> . ....   | 43 |
| <b>Table S37.</b> Measured frequencies and residuals (in MHz) of the rotational transitions of the (H <sub>2</sub> <sup>16</sup> O) (H <sub>2</sub> <sup>18</sup> O) isotopologue of <b>isomer 3 / EQC-4-I</b> . ....  | 44 |
| <b>Table S38.</b> Measured frequencies and residuals (in MHz) of the rotational transitions of the (H <sub>2</sub> <sup>18</sup> O) (H <sub>2</sub> <sup>18</sup> O) isotopologue of <b>isomer 3 / EQC-4-I</b> . ....  | 45 |
| <b>Table S39.</b> Measured frequencies and residuals (in MHz) of the rotational transitions of the parent species of <b>isomer 4 / EQC-1-I</b> . ....                                                                  | 46 |
| <b>Table S40.</b> Measured frequencies and residuals (in MHz) of the rotational transitions of the (H <sub>2</sub> <sup>18</sup> O)(H <sub>2</sub> <sup>16</sup> O) isotopologue of <b>isomer 4 / EQC-1-I</b> . ....   | 47 |
| <b>Table S41.</b> Measured frequencies and residuals (in MHz) of the rotational transitions of the (H <sub>2</sub> <sup>16</sup> O)(H <sub>2</sub> <sup>18</sup> O) isotopologue of <b>isomer 4 / EQC-1-I</b> . ....   | 47 |
| <b>Table S42.</b> Measured frequencies and residuals (in MHz) of the rotational transitions of the parent species of <b>isomer 5 / EQC-2-I</b> . ....                                                                  | 48 |
| <b>Table S43.</b> Measured frequencies and residuals (in MHz) of the rotational transitions of the (H <sub>2</sub> <sup>18</sup> O)(H <sub>2</sub> <sup>16</sup> O) isotopologue of <b>isomer 5 / EQC-2-I</b> . ....   | 49 |
| <b>Table S44.</b> Measured frequencies and residuals (in MHz) of the rotational transitions of the (H <sub>2</sub> <sup>16</sup> O) (H <sub>2</sub> <sup>18</sup> O) isotopologue of <b>isomer 5 / EQC-2-I</b> . ....  | 50 |

|                                                                                                                                                                                                                      |    |
|----------------------------------------------------------------------------------------------------------------------------------------------------------------------------------------------------------------------|----|
| <b>Table S45.</b> Measured frequencies and residuals (in MHz) of the rotational transitions of the (H <sub>2</sub> <sup>18</sup> O) (H <sub>2</sub> <sup>18</sup> O) isotopologue of <b>isomer 5 / EQC-2-I</b> ..... | 51 |
| <b>Table S46.</b> Measured frequencies and residuals (in MHz) of the rotational transitions of the parent species of <b>isomer 6 / EQa-4-I</b> .....                                                                 | 52 |
| <b>Table S47.</b> Measured frequencies and residuals (in MHz) of the rotational transitions of the (H <sub>2</sub> <sup>18</sup> O) (H <sub>2</sub> <sup>16</sup> O) isotopologue of <b>isomer 6 / EQa-4-I</b> ..... | 53 |
| <b>Table S48.</b> Measured frequencies and residuals (in MHz) of the rotational transitions of the (H <sub>2</sub> <sup>16</sup> O) (H <sub>2</sub> <sup>18</sup> O) isotopologue of <b>isomer 6 / EQa-4-I</b> ..... | 53 |
| <b>Table S49.</b> Measured frequencies and residuals (in MHz) of the rotational transitions of the (H <sub>2</sub> <sup>18</sup> O) (H <sub>2</sub> <sup>18</sup> O) isotopologue of <b>isomer 6 E/ Qa-4-I</b> ..... | 53 |
| <b>Table S50.</b> Measured frequencies and residuals (in MHz) of the rotational transitions of the parent species of <b>isomer 7 / EQA-2-I</b> .....                                                                 | 54 |
| <b>Table S51.</b> Measured frequencies and residuals (in MHz) of the rotational transitions of the (H <sub>2</sub> <sup>18</sup> O) (H <sub>2</sub> <sup>16</sup> O) isotopologue of <b>isomer 7 / EQA-2-I</b> ..... | 55 |
| <b>Table S52.</b> Measured frequencies and residuals (in MHz) of the rotational transitions of the (H <sub>2</sub> <sup>16</sup> O) (H <sub>2</sub> <sup>18</sup> O) isotopologue of <b>isomer 7 / EQA-2-I</b> ..... | 56 |
| <b>Table S53.</b> Measured frequencies and residuals (in MHz) of the rotational transitions of the (H <sub>2</sub> <sup>18</sup> O) (H <sub>2</sub> <sup>18</sup> O) isotopologue of <b>isomer 7 / EQA-2-I</b> ..... | 57 |

**Table S1.** Calculated spectroscopic parameters for the isomers of limonene-(H<sub>2</sub>O)<sub>2</sub> at B3LYP-D3BJ/6-311++G(d,p) and MP2/6-311++G(d,p) levels of theory within 4 kJ mol<sup>-1</sup>.

|                                             | EQA-3-I |       | EQA-3-II |       | EQA-3-III |        | EQA-3-IV |       | EQC-1-I |        | EQC-4-I |       |
|---------------------------------------------|---------|-------|----------|-------|-----------|--------|----------|-------|---------|--------|---------|-------|
|                                             | B3LYP   | MP2   | B3LYP    | MP2   | B3LYP     | MP2    | B3LYP    | MP2   | B3LYP   | MP2    | B3LYP   | MP2   |
| A <sup>a</sup> (MHz)                        | 971.5   | 970.2 | 959.3    | 966.6 | 1232.0    | 1197.0 | 969.2    | 956.3 | 1072.0  | 1058.6 | 964.3   | 962.3 |
| B (MHz)                                     | 597.8   | 597.5 | 607.0    | 606.5 | 472.3     | 479.8  | 597.5    | 599.2 | 579.3   | 581.3  | 605.5   | 603.9 |
| C (MHz)                                     | 447.3   | 443.7 | 441.1    | 444.7 | 430.0     | 432.5  | 446.2    | 443.2 | 477.2   | 475.4  | 445.6   | 450.0 |
| $\kappa$                                    | -0.43   | -0.42 | -0.36    | -0.36 | -0.89     | -0.88  | -0.42    | -0.39 | -0.66   | -0.64  | -0.38   | -0.40 |
| $\mu_a$ (D)                                 | 2.7     | -2.7  | 2.9      | -3.0  | 0.0       | 0.1    | 2.7      | -2.7  | -2.6    | 2.9    | -3.0    | -2.9  |
| $\mu_b$ (D)                                 | 0.4     | 0.2   | 0.3      | -0.2  | -0.2      | -0.1   | -0.6     | 0.7   | 2.5     | 2.2    | -0.1    | -0.1  |
| $\mu_c$ (D)                                 | 0.7     | 0.9   | -0.5     | 0.0   | -1.6      | -1.8   | -0.5     | 0.7   | 0.2     | 0.1    | -0.5    | -0.6  |
| $\Delta E$ (cm <sup>-1</sup> )              | 88.7    | 29.8  | 45.1     | 0.0   | 103.8     | 67.2   | 164.4    | 132.8 | 0.0     | 184.1  | 140.4   | 106.3 |
| $\Delta E_{ZPC}$ (cm <sup>-1</sup> )        | 0.0     | 53.8  | 27.2     | 0.0   | 41.3      | 82.7   | 59.5     | 111.5 | 70.2    | 304.9  | 80.5    | 149.7 |
| $\Delta E(\text{BSSE})(\text{kJ mol}^{-1})$ | -55.6   | -38.5 | -55.8    | -39.1 | -55.3     | -39.5  | -54.8    | -37.9 | -54.7   | -38.1  | -55.0   | -39.2 |

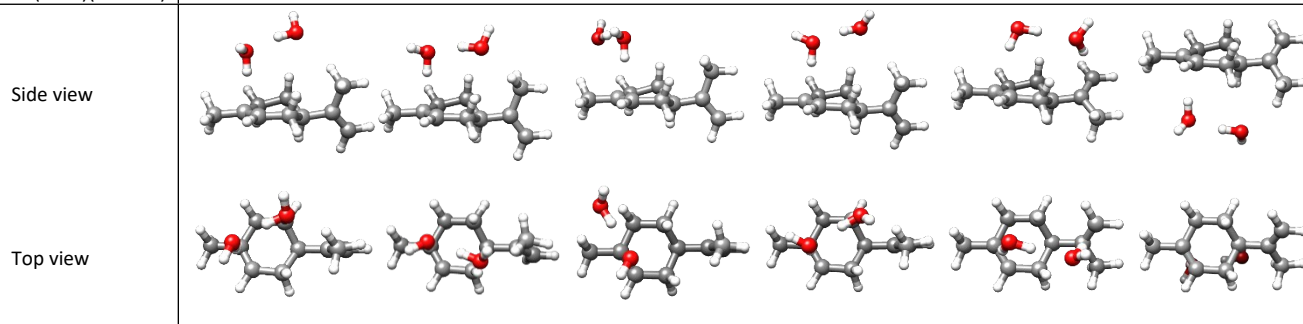

<sup>a</sup> A, B and C are the rotational constants;  $\mu_a$ ,  $\mu_b$  and  $\mu_c$  are the electric dipole moments along the principal inertial axes;  $\Delta E$  are the relative energies;  $\Delta E_{ZPC}$  are the relative energies including zero-point corrections;  $\Delta E(\text{BSSE})$  are the interaction energies including BSSE and fragment relaxation;  $\kappa$  is the calculated Ray's asymmetry parameter

|                                             | EQA-3-V |        | EQA-4-I |       | EQA-4-II |        | EQC-2-I |        | EQA-4-III |       | EQA-4-IV |                       |
|---------------------------------------------|---------|--------|---------|-------|----------|--------|---------|--------|-----------|-------|----------|-----------------------|
|                                             | B3LYP   | MP2    | B3LYP   | MP2   | B3LYP    | MP2    | B3LYP   | MP2    | B3LYP     | MP2   | B3LYP    | MP2                   |
| A <sup>a</sup> (MHz)                        | 1239.4  | 1148.6 | 1001.5  | 980.5 | 1012.1   | 1001.5 | 1075.2  | 1081.3 | 946.0     | 939.2 | 1172.6   |                       |
| B (MHz)                                     | 467.4   | 484.1  | 557.6   | 577.1 | 570.3    | 577.9  | 541.4   | 538.8  | 609.1     | 611.5 | 479.8    |                       |
| C (MHz)                                     | 428.0   | 433.5  | 468.4   | 476.6 | 471.7    | 472.0  | 431.8   | 436.6  | 444.0     | 444.4 | 435.5    |                       |
| $\kappa$                                    | -0.90   | -0.86  | -0.67   | -0.60 | -0.64    | -0.60  | -0.66   | -0.68  | -0.34     | -0.32 | -0.88    | Converged to EQA-4-II |
| $\mu_a$ (D)                                 | -0.7    | -0.2   | 0.5     | -1.0  | -0.8     | -0.9   | 1.7     | -1.8   | 2.6       | 2.6   | 1.0      |                       |
| $\mu_b$ (D)                                 | -0.4    | 0.2    | 1.4     | 0.9   | -0.8     | 0.5    | -0.4    | 0.0    | 1.3       | 1.1   | -0.2     |                       |
| $\mu_c$ (D)                                 | 1.2     | -1.8   | -1.4    | -1.6  | -1.3     | -1.5   | 0.6     | -0.9   | -0.4      | 0.5   | -1.0     |                       |
| $\Delta E$ (cm <sup>-1</sup> )              | 187.5   | 182.5  | 195.8   | 104.5 | 172.7    | 68.0   | 188.5   | 202.9  | 159.8     | 7.6   | 234.4    |                       |
| $\Delta E_{ZPC}$ (cm <sup>-1</sup> )        | 86.9    | 141.1  | 87.6    | 75.7  | 88.7     | 62.1   | 89.3    | 161.1  | 92.2      | 72.9  | 101.2    |                       |
| $\Delta E(\text{BSSE})(\text{kJ mol}^{-1})$ | -54.7   | -38.3  | -55.0   | -37.9 | -55.0    | -38.1  | -54.5   | -39.5  | -55.0     | -38.5 | -54.1    |                       |

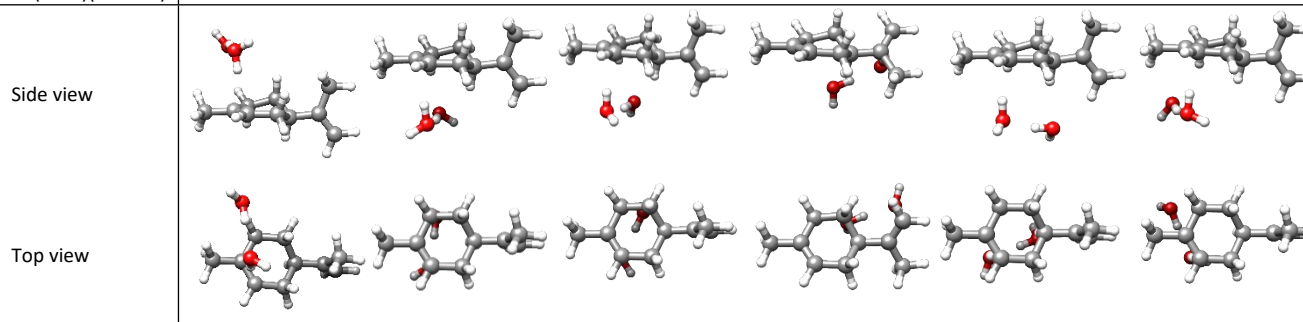

<sup>a</sup> A, B and C are the rotational constants;  $\mu_a$ ,  $\mu_b$  and  $\mu_c$  are the electric dipole moments along the principal inertial axes;  $\Delta E$  are the relative energies;  $\Delta E_{ZPC}$  are the relative energies including zero-point corrections;  $\Delta E(\text{BSSE})$  are the interaction energies including BSSE and fragment relaxation;  $\kappa$  is the calculated Ray's asymmetry parameter

**Table S1 (cont.).**

|                                             | EQA-4-V |                      | EQC-3-I |        | EQA-4-VI |                       | EQa-4-I |        | EQA-2-I |       | EQC-2-II |        |
|---------------------------------------------|---------|----------------------|---------|--------|----------|-----------------------|---------|--------|---------|-------|----------|--------|
|                                             | B3LYP   | MP2                  | B3LYP   | MP2    | B3LYP    | MP2                   | B3LYP   | MP2    | B3LYP   | MP2   | B3LYP    | MP2    |
| A <sup>a</sup> (MHz)                        | 1165.5  |                      | 1072.6  | 1049.7 | 1163.5   |                       | 1010.0  | 1000.1 | 1010.3  | 990.5 | 1132.9   | 1102.9 |
| B (MHz)                                     | 483.5   |                      | 581.0   | 581.2  | 481.5    |                       | 578.0   | 589.5  | 565.9   | 566.5 | 485.6    | 507.3  |
| C (MHz)                                     | 437.5   |                      | 479.3   | 475.0  | 436.8    |                       | 482.8   | 479.0  | 422.5   | 418.6 | 439.3    | 444.0  |
| $\kappa$                                    | -0.87   | Converged to EQA-4-I | -0.66   | -0.63  | -0.88    | Converged to EQA-4-II | -0.64   | -0.58  | -0.51   | -0.48 | -0.87    | -0.81  |
| $\mu_a$ (D)                                 | -0.2    |                      | 3.0     | -3.1   | -0.9     |                       | 1.4     | 1.4    | -1.7    | -2.0  | -1.0     | 1.5    |
| $\mu_b$ (D)                                 | 0.4     |                      | -2.5    | -2.4   | 0.3      |                       | 0.2     | 0.1    | 1.0     | 1.2   | 0.1      | -0.1   |
| $\mu_c$ (D)                                 | -1.5    |                      | -0.2    | -0.1   | -1.0     |                       | -1.0    | -1.4   | 1.1     | -0.8  | -1.1     | 1.1    |
| $\Delta E$ (cm <sup>-1</sup> )              | 196.0   |                      | 44.0    | 212.4  | 234.9    |                       | 210.0   | 157.0  | 279.6   | 286.5 | 207.1    | 255.6  |
| $\Delta E_{ZPC}$ (cm <sup>-1</sup> )        | 118.7   |                      | 119.6   | 345.9  | 120.7    |                       | 123.3   | 156.7  | 129.5   | 267.1 | 133.0    | 235.7  |
| $\Delta E(\text{BSSE})(\text{kJ mol}^{-1})$ | -54.5   |                      | -56.4   | -37.5  | -54.1    |                       | -54.1   | -39.6  | -53.6   | -37.6 | -54.1    | -38.8  |
| Side view                                   |         |                      |         |        |          |                       |         |        |         |       |          |        |
| Top view                                    |         |                      |         |        |          |                       |         |        |         |       |          |        |

<sup>a</sup> A, B and C are the rotational constants;  $\mu_a$ ,  $\mu_b$  and  $\mu_c$  are the electric dipole moments along the principal inertial axes;  $\Delta E$  are the relative energies;  $\Delta E_{ZPC}$  are the relative energies including zero-point corrections;  $\Delta E(\text{BSSE})$  are the interaction energies including BSSE and fragment relaxation;  $\kappa$  is the calculated Ray's asymmetry parameter

|                                             | EQC-2-III |        | EQA-1-I |        | EQC-4-II |       | EQA-4-VII |       | AXa-1-I |        | EQA-1-II |        |
|---------------------------------------------|-----------|--------|---------|--------|----------|-------|-----------|-------|---------|--------|----------|--------|
|                                             | B3LYP     | MP2    | B3LYP   | MP2    | B3LYP    | MP2   | B3LYP     | MP2   | B3LYP   | MP2    | B3LYP    | MP2    |
| A <sup>a</sup> (MHz)                        | 1077.6    | 1064.0 | 1011.6  | 1006.4 | 990.8    | 982.3 | 926.1     | 913.9 | 1333.5  | 1322.0 | 1154.7   | 1135.1 |
| B (MHz)                                     | 540.5     | 546.2  | 602.6   | 604.4  | 553.1    | 567.8 | 615.3     | 617.7 | 473.9   | 472.9  | 467.3    | 465.9  |
| C (MHz)                                     | 432.2     | 435.0  | 458.1   | 461.5  | 488.1    | 494.2 | 434.5     | 434.6 | 454.8   | 461.5  | 399.5    | 397.6  |
| $\kappa$                                    | -0.66     | -0.65  | -0.48   | -0.48  | -0.91    | -0.70 | -0.26     | -0.24 | -0.96   | -0.97  | -0.82    | -0.81  |
| $\mu_a$ (D)                                 | 2.1       | -2.4   | -2.0    | 2.3    | 1.1      | 1.8   | -2.7      | -2.9  | -0.1    | 0.3    | 0.0      | 0.0    |
| $\mu_b$ (D)                                 | -0.3      | 0.3    | -2.4    | 2.2    | -0.3     | -0.2  | -1.4      | 1.1   | 0.6     | 0.7    | -0.9     | 0.9    |
| $\mu_c$ (D)                                 | -0.1      | 0.1    | 1.0     | -1.0   | 1.9      | 1.7   | -0.4      | -0.4  | -1.1    | -1.4   | -1.5     | 1.5    |
| $\Delta E$ (cm <sup>-1</sup> )              | 261.5     | 235.7  | 135.7   | 103.3  | 260.6    | 206.4 | 277.5     | 164.2 | 238.5   | 47.5   | 255.8    | 324.6  |
| $\Delta E_{ZPC}$ (cm <sup>-1</sup> )        | 138.0     | 226.5  | 139.1   | 214.9  | 163.3    | 158.9 | 164.2     | 186.1 | 168.8   | 119.0  | 174.0    | 355.1  |
| $\Delta E(\text{BSSE})(\text{kJ mol}^{-1})$ | -53.7     | -38.9  | -55.0   | -37.3  | -53.7    | -38.2 | -53.6     | -37.4 | -54.1   | -39.4  | -53.9    | -37.5  |
| Side view                                   |           |        |         |        |          |       |           |       |         |        |          |        |
| Top view                                    |           |        |         |        |          |       |           |       |         |        |          |        |

<sup>a</sup> A, B and C are the rotational constants;  $\mu_a$ ,  $\mu_b$  and  $\mu_c$  are the electric dipole moments along the principal inertial axes;  $\Delta E$  are the relative energies;  $\Delta E_{ZPC}$  are the relative energies including zero-point corrections;  $\Delta E(\text{BSSE})$  are the interaction energies including BSSE and fragment relaxation;  $\kappa$  is the calculated Ray's asymmetry parameter.

**Table S1 (cont.).**

|                                             | EQA-1-III |       | EQa-4-II |       | EQC-4-III |       | EQA-2-II |        | EQC-3-II |        | EQC-4-IV |                                 |
|---------------------------------------------|-----------|-------|----------|-------|-----------|-------|----------|--------|----------|--------|----------|---------------------------------|
|                                             | B3LYP     | MP2   | B3LYP    | MP2   | B3LYP     | MP2   | B3LYP    | MP2    | B3LYP    | MP2    | B3LYP    | MP2                             |
| A <sup>a</sup> (MHz)                        | 985.6     | 987.2 | 1011.8   | 996.7 | 916.5     | 910.2 | 1021.9   | 1020.8 | 1273.9   | 1242.4 | 1157.1   |                                 |
| B (MHz)                                     | 615.2     | 610.5 | 576.8    | 590.0 | 639.7     | 641.9 | 568.3    | 567.5  | 455.4    | 461.5  | 477.5    |                                 |
| C (MHz)                                     | 457.1     | 458.6 | 479.2    | 482.8 | 432.2     | 434.9 | 429.6    | 431.8  | 416.4    | 417.7  | 443.7    |                                 |
| $\kappa$                                    | -0.40     | -0.43 | -0.63    | -0.58 | -0.14     | -0.13 | -0.53    | -0.54  | -0.91    | -0.89  | -0.91    | Converged<br>to<br>EQC-<br>4-IV |
| $\mu_a$ (D)                                 | -3.0      | -3.0  | 2.1      | 2.4   | -2.4      | -2.4  | -2.5     | -2.7   | 0.4      | -0.3   | 0.2      |                                 |
| $\mu_b$ (D)                                 | -2.5      | 2.5   | -0.1     | -0.2  | -0.5      | 0.2   | 0.0      | -0.1   | 0.9      | 0.8    | 0.8      |                                 |
| $\mu_c$ (D)                                 | 0.4       | 0.4   | 0.8      | 1.0   | 1.1       | 1.2   | -0.5     | -0.4   | -1.5     | -1.7   | -1.6     |                                 |
| $\Delta E$ (cm <sup>-1</sup> )              | 159.6     | 144.0 | 288.0    | 209.1 | 281.2     | 291.5 | 306.2    | 263.9  | 253.4    | 286.6  | 288.3    |                                 |
| $\Delta E_{ZPC}$ (cm <sup>-1</sup> )        | 177.1     | 227.6 | 181.5    | 184.6 | 182.4     | 268.9 | 197.5    | 294.5  | 197.7    | 283.8  | 215.7    |                                 |
| $\Delta E(\text{BSSE})(\text{kJ mol}^{-1})$ | -55.0     | -36.9 | -53.4    | -39.1 | -53.5     | -38.3 | -53.3    | -37.4  | -54.0    | -39.0  | -53.3    |                                 |
| Side view                                   |           |       |          |       |           |       |          |        |          |        |          |                                 |
| Top view                                    |           |       |          |       |           |       |          |        |          |        |          |                                 |

<sup>a</sup> A, B and C are the rotational constants;  $\mu_a$ ,  $\mu_b$  and  $\mu_c$  are the electric dipole moments along the principal inertial axes;  $\Delta E$  are the relative energies;  $\Delta E_{ZPC}$  are the relative energies including zero-point corrections;  $\Delta E(\text{BSSE})$  are the interaction energies including BSSE and fragment relaxation;  $\kappa$  is the calculated Ray's asymmetry parameter.

|                                             | EQA-2-III |        | AXa-1-II |        | AXa-4-I |        | AXa-4-II |        | EQA-3-I |       | EQA-2-IV |        |
|---------------------------------------------|-----------|--------|----------|--------|---------|--------|----------|--------|---------|-------|----------|--------|
|                                             | B3LYP     | MP2    | B3LYP    | MP2    | B3LYP   | B3LYP  | B3LYP    | MP2    | B3LYP   | MP2   | B3LYP    | MP2    |
| A <sup>a</sup> (MHz)                        | 1168.2    | 1141.3 | 1349.9   | 1323.4 | 1308.9  | 1264.1 | 1009.4   | 1004.6 | 960.4   | 949.3 | 1161.4   | 1135.1 |
| B (MHz)                                     | 459.0     | 463.7  | 467.1    | 463.1  | 481.9   | 497.1  | 609.3    | 613.6  | 603.5   | 606.1 | 457.3    | 462.1  |
| C (MHz)                                     | 391.8     | 392.1  | 451.7    | 460.9  | 465.9   | 476.0  | 466.2    | 473.5  | 435.1   | 434.6 | 393.2    | 394.0  |
| $\kappa$                                    | -0.83     | -0.81  | -0.97    | -0.99  | -0.96   | -0.95  | -0.47    | -0.47  | -0.36   | -0.33 | -0.83    | -0.82  |
| $\mu_a$ (D)                                 | 0.2       | -0.1   | 0.3      | 0.0    | 0.1     | -0.2   | 1.2      | 1.3    | 2.2     | -2.4  | 0.5      | 0.3    |
| $\mu_b$ (D)                                 | -0.4      | 0.4    | -1.0     | 0.5    | 0.6     | -0.9   | 1.4      | -1.6   | -1.7    | -1.3  | -0.4     | -0.3   |
| $\mu_c$ (D)                                 | 1.4       | -1.4   | 0.6      | -1.6   | 1.4     | -1.4   | -0.3     | -0.2   | 0.7     | -0.7  | 1.8      | -2.0   |
| $\Delta E$ (cm <sup>-1</sup> )              | 339.7     | 429.5  | 277.7    | 105.5  | 258.5   | 21.0   | 246.8    | 80.2   | 332.2   | 263.0 | 319.3    | 410.4  |
| $\Delta E_{ZPC}$ (cm <sup>-1</sup> )        | 223.2     | 419.4  | 232.9    | 148.8  | 245.6   | 104.0  | 246.9    | 114.6  | 248.9   | 309.7 | 255.2    | 443.3  |
| $\Delta E(\text{BSSE})(\text{kJ mol}^{-1})$ | -53.0     | -37.2  | -53.6    | -39.0  | -53.8   | -39.4  | -53.0    | -38.6  | -53.2   | -37.9 | -53.2    | -36.8  |
| Side view                                   |           |        |          |        |         |        |          |        |         |       |          |        |
| Top view                                    |           |        |          |        |         |        |          |        |         |       |          |        |

<sup>a</sup> A, B and C are the rotational constants;  $\mu_a$ ,  $\mu_b$  and  $\mu_c$  are the electric dipole moments along the principal inertial axes;  $\Delta E$  are the relative energies;  $\Delta E_{ZPC}$  are the relative energies including zero-point corrections;  $\Delta E(\text{BSSE})$  are the interaction energies including BSSE and fragment relaxation;  $\kappa$  is the calculated Ray's asymmetry parameter.

**Table S1 (cont.).**

|                                             | AXa-4-III                                                                         |        | AXa-4-IV |        | EQC-1-II |        |
|---------------------------------------------|-----------------------------------------------------------------------------------|--------|----------|--------|----------|--------|
|                                             | B3LYP                                                                             | MP2    | B3LYP    | MP2    | B3LYP    | MP2    |
| A <sup>a</sup> (MHz)                        | 1308.3                                                                            | 1255.0 | 1012.4   | 1012.0 | 1141.2   | 1123.2 |
| B (MHz)                                     | 480.9                                                                             | 498.7  | 606.7    | 606.5  | 469.6    | 468.4  |
| C (MHz)                                     | 464.2                                                                             | 469.7  | 465.2    | 470.2  | 399.8    | 397.8  |
| $\kappa$                                    | -0.96                                                                             | -0.93  | -0.48    | -0.50  | -0.81    | -0.81  |
| $\mu_a$ (D)                                 | -0.5                                                                              | 0.3    | -0.9     | 0.9    | 0.7      | -0.8   |
| $\mu_b$ (D)                                 | 0.2                                                                               | -1.0   | 1.5      | -1.6   | -1.2     | 1.3    |
| $\mu_c$ (D)                                 | 1.6                                                                               | -1.5   | 0.9      | -1.0   | 1.4      | -1.6   |
| $\Delta E$ (cm <sup>-1</sup> )              | 335.7                                                                             | 130.4  | 368.9    | 141.3  | 309.9    | 525.5  |
| $\Delta E_{zpc}$ (cm <sup>-1</sup> )        | 256.1                                                                             | 151.7  | 257.7    | 155.4  | 310.8    | 585.8  |
| $\Delta E(\text{BSSE})(\text{kJ mol}^{-1})$ | -53.0                                                                             | -38.6  | -52.6    | -38.1  | -52.1    | -34.8  |
| Side view                                   | 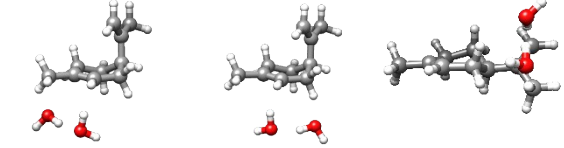 |        |          |        |          |        |
| Top view                                    |  |        |          |        |          |        |

<sup>a</sup>A, B and C are the rotational constants;  $\mu_a$ ,  $\mu_b$  and  $\mu_c$  are the electric dipole moments along the principal inertial axes;  $\Delta E$  are the relative energies;  $\Delta E_{zpc}$  are the relative energies including zero-point corrections;  $\Delta E(\text{BSSE})$  are the interaction energies including BSSE and fragment relaxation;  $\kappa$  is the calculated Ray's asymmetry parameter.



**Table S2.** Calculated spectroscopic parameters for the lower-energy isomers of limonene-(H<sub>2</sub>O)<sub>2</sub> at M062X/6-311++G(d,p) level of theory.

| Name      | A <sup>a</sup> (MHz) | B (MHz) | C (MHz) | μ <sub>a</sub> (D) | μ <sub>b</sub> (D) | μ <sub>c</sub> (D) | ΔE (cm <sup>-1</sup> ) | ΔE <sub>ZPC</sub> (cm <sup>-1</sup> ) |
|-----------|----------------------|---------|---------|--------------------|--------------------|--------------------|------------------------|---------------------------------------|
| EQC-1-I   | 1105.9               | 582.3   | 486.7   | -2.8               | 2.2                | 0.2                | 0.0                    | 0.0                                   |
| EQC-3-I   | 1105.1               | 582.0   | 488.3   | 2.9                | -2.3               | -0.1               | 35.5                   | 30.5                                  |
| EQA-3-IV  | 1002.1               | 607.3   | 454.8   | -2.3               | -0.5               | -0.9               | 292.4                  | 182.2                                 |
| EQA-1-I   | 1047.0               | 605.9   | 469.9   | -2.2               | -2.2               | 1.0                | 192.8                  | 189.4                                 |
| EQA-3-II  | 1012.6               | 605.3   | 451.2   | 2.8                | 0.1                | -0.4               | 320.2                  | 201.9                                 |
| EQa-4-I   | 1047.4               | 605.2   | 488.6   | 2.2                | -0.2               | -1.1               | 157.3                  | 205.0                                 |
| EQA-3-III | 1256.5               | 489.0   | 438.8   | -0.1               | -0.7               | -1.5               | 348.6                  | 235.5                                 |
| EQC-2-I   | 1101.2               | 549.6   | 435.6   | 1.9                | -0.2               | 0.5                | 348.9                  | 240.8                                 |
| EQA-1-III | 1040.4               | 609.7   | 470.4   | -3.1               | -2.2               | 0.4                | 229.4                  | 246.3                                 |
| EQA-3-V   | 1259.6               | 479.8   | 434.4   | -0.7               | -0.5               | 1.1                | 445.1                  | 255.7                                 |
| EQA-4-V   | 1217.4               | 481.3   | 437.3   | -0.3               | -0.1               | -1.3               | 474.2                  | 297.4                                 |
| EQa-3-I   | 1063.1               | 591.7   | 475.3   | -2.7               | 2.7                | -0.1               | 317.7                  | 302.2                                 |
| EQa-4-II  | 1043.6               | 614.0   | 488.6   | -2.2               | 0.3                | -1.3               | 366.5                  | 305.9                                 |
| EQA-4-II  | 1025.2               | 596.3   | 481.8   | 1.4                | 0.5                | -1.3               | 472.0                  | 309.7                                 |
| EQC-4-I   | 977.6                | 611.7   | 448.7   | 3.1                | 0.1                | -0.1               | 333.9                  | 316.7                                 |
| EQA-2-I   | 1091.0               | 557.4   | 432.3   | -1.7               | 0.7                | 1.1                | 465.5                  | 330.7                                 |
| EQC-2-III | 1100.2               | 551.3   | 439.9   | 2.3                | -0.2               | -0.2               | 420.3                  | 336.5                                 |
| EQC-4-III | 969.6                | 638.7   | 448.4   | -2.4               | 0.0                | 1.1                | 422.0                  | 340.0                                 |
| EQA-4-I   | 1020.2               | 612.4   | 497.0   | -1.5               | -2.3               | -1.6               | 339.2                  | 344.1                                 |
| EQC-3-II  | 1307.9               | 459.5   | 419.5   | 0.4                | 0.6                | -1.6               | 386.0                  | 354.5                                 |
| EQC-4-II  | 998.4                | 574.5   | 509.0   | 1.1                | -0.8               | 2.1                | 406.1                  | 367.2                                 |
| EQA-3-I   | 989.5                | 604.3   | 448.1   | 2.9                | 0.1                | 0.5                | 418.5                  | 369.4                                 |
| EQA-2-II  | 1101.9               | 561.2   | 440.8   | -2.7               | 0.4                | -0.3               | 502.9                  | 399.2                                 |
| EQA-4-VI  | 1203.5               | 485.0   | 440.1   | -0.9               | 0.0                | -0.8               | 524.8                  | 399.4                                 |
| EQA-4-IV  | 1203.4               | 485.1   | 440.1   | 1.0                | 0.0                | -0.8               | 524.7                  | 402.3                                 |
| AXa-4-IV  | 952.5                | 659.9   | 487.5   | 1.2                | 1.5                | 0.9                | 484.1                  | 407.8                                 |
| AXa-4-II  | 951.6                | 661.7   | 489.2   | -1.5               | 1.5                | -0.7               | 435.9                  | 408.9                                 |
| EQC-4-IV  | 1194.9               | 475.8   | 447.5   | -0.1               | 1.1                | 1.4                | 477.7                  | 415.0                                 |
| EQC-2-II  | 1094.6               | 494.8   | 463.8   | -0.5               | 0.4                | -1.6               | 430.5                  | 425.3                                 |
| AXa-4-I   | 1297.7               | 497.5   | 484.0   | -0.2               | 0.5                | 1.4                | 375.7                  | 448.2                                 |
| EQA-4-VII | 989.1                | 626.8   | 448.0   | -2.4               | 1.0                | -0.4               | 535.8                  | 452.8                                 |
| EQA-4-III | 947.0                | 619.7   | 447.3   | 2.8                | 1.1                | -0.2               | 466.8                  | 457.2                                 |
| AXa-1-I   | 1383.7               | 475.5   | 456.1   | -0.2               | 1.2                | 0.7                | 440.7                  | 462.2                                 |
| AXa-1-II  | 1380.3               | 476.2   | 457.7   | 0.3                | 1.1                | 0.3                | 453.7                  | 466.6                                 |
| EQC-1-II  | 1125.9               | 492.2   | 406.3   | 0.3                | -1.2               | 1.4                | 526.0                  | 481.3                                 |
| AXa-4-III | 1294.7               | 498.0   | 481.7   | 0.4                | 0.2                | 1.6                | 465.7                  | 489.4                                 |
| EQA-2-III | 1137.8               | 483.1   | 402.3   | -0.2               | -0.5               | 1.6                | 622.8                  | 492.1                                 |
| EQA-1-II  | 1134.2               | 486.8   | 413.5   | -0.2               | -0.9               | -1.5               | 476.2                  | 509.0                                 |
| EQA-2-IV  | 1132.7               | 480.8   | 403.0   | 0.3                | -0.5               | 1.9                | 628.0                  | 546.1                                 |

**Table S3.** Calculated spectroscopic parameters for the lower-energy isomers of limonene-(H<sub>2</sub>O)<sub>2</sub> at wB97XD/6-311++G(d,p) level of theory.

| Name        | A <sup>a</sup> (MHz) | B (MHz) | C (MHz) | μ <sub>a</sub> (D) | μ <sub>b</sub> (D) | μ <sub>c</sub> (D) | ΔE (cm <sup>-1</sup> ) | ΔE <sub>ZPC</sub> (cm <sup>-1</sup> ) |
|-------------|----------------------|---------|---------|--------------------|--------------------|--------------------|------------------------|---------------------------------------|
| EQC-1-I     | 1082.2               | 581.4   | 480.7   | -2.5               | 2.5                | 0.1                | 0.0                    | 0.0                                   |
| EQA-3-II    | 968.5                | 610.2   | 445.2   | 2.8                | 0.4                | -0.6               | 176.9                  | 12.5                                  |
| EQC-3-I     | 1083.1               | 582.6   | 482.7   | 2.9                | -2.5               | -0.3               | 35.4                   | 34.0                                  |
| EQA-3-V     | 1248.3               | 475.7   | 431.6   | -0.8               | -0.3               | 1.1                | 303.9                  | 75.9                                  |
| EQA-1-I     | 1020.5               | 604.2   | 461.7   | -1.9               | -2.4               | 1.0                | 159.4                  | 81.9                                  |
| EQA-3-III   | 1243.0               | 476.6   | 432.1   | 0.1                | -0.3               | -1.5               | 241.9                  | 84.7                                  |
| EQa-4-I     | 1012.5               | 592.1   | 489.9   | 1.6                | 0.2                | -1.0               | 293.0                  | 101.8                                 |
| EQA-4-IV/VI | 1180.8               | 487.1   | 440.1   | 1.0                | -0.2               | -0.8               | 370.0                  | 119.8                                 |
| EQA-3-I     | 973.1                | 603.4   | 449.0   | 2.8                | 0.5                | 0.6                | 218.2                  | 124.7                                 |
| EQA-4-I     | 990.0                | 587.6   | 482.9   | 0.7                | -1.9               | 1.5                | 292.0                  | 132.1                                 |
| EQC-4-II    | 993.3                | 560.7   | 496.1   | 1.0                | -0.5               | 2.0                | 372.4                  | 143.3                                 |
| EQA-4-V     | 1188.6               | 483.4   | 437.5   | -0.3               | 0.2                | -1.4               | 351.0                  | 147.7                                 |
| EQC-2-I     | 1067.9               | 550.5   | 434.8   | 1.8                | -0.5               | 0.6                | 330.8                  | 153.2                                 |
| EQC-4-I     | 964.2                | 610.6   | 444.9   | 3.1                | -0.2               | 0.2                | 243.1                  | 155.8                                 |
| EQA-3-IV    | 973.5                | 602.9   | 448.0   | -2.7               | 0.7                | -0.6               | 290.1                  | 160.2                                 |
| EQC-2-II    | 1125.9               | 492.5   | 444.3   | -0.8               | 0.1                | -1.2               | 354.3                  | 168.1                                 |
| AXa-1-II    | 1324.8               | 477.4   | 459.9   | 0.4                | 0.8                | 0.9                | 476.3                  | 170.3                                 |
| EQA-4-II    | 1008.1               | 579.7   | 480.1   | -0.6               | -0.8               | -1.2               | 335.8                  | 178.0                                 |
| EQA-1-III   | 1007.9               | 613.5   | 463.2   | -3.0               | -2.4               | 0.3                | 171.3                  | 181.7                                 |
| EQA-4-III   | 939.8                | 616.7   | 444.3   | 2.7                | 1.4                | -0.3               | 292.7                  | 185.0                                 |
| EQA-4-VII   | 924.4                | 622.9   | 435.6   | -2.9               | -1.5               | -0.4               | 407.3                  | 198.8                                 |
| AXa-1-I     | 1322.2               | 478.6   | 459.3   | 0.1                | 0.5                | 1.1                | 434.9                  | 201.5                                 |
| EQC-2-III   | 1070.2               | 549.3   | 434.6   | 2.1                | -0.4               | 0.0                | 405.7                  | 203.0                                 |
| EQC-4-IV    | 1169.7               | 478.0   | 446.2   | -0.1               | 0.9                | 1.6                | 413.5                  | 228.7                                 |
| EQC-4-III   | 931.2                | 642.0   | 438.1   | -2.3               | -0.8               | 1.1                | 348.9                  | 276.3                                 |
| EQA-2-I     | 1027.8               | 568.7   | 429.6   | -1.7               | 1.0                | 1.1                | 406.0                  | 281.8                                 |
| EQC-3-II    | 1284.0               | 457.5   | 418.1   | 0.6                | 0.9                | -1.5               | 351.1                  | 289.7                                 |
| EQA-2-IV    | 1147.4               | 470.5   | 399.4   | 0.4                | -0.6               | 1.7                | 450.5                  | 290.8                                 |
| EQa-4-II    | 1015.7               | 587.1   | 485.9   | 2.4                | 0.0                | 0.7                | 407.5                  | 292.6                                 |
| AXa-4-II    | 996.0                | 619.3   | 472.0   | -1.0               | 1.6                | -0.7               | 470.4                  | 301.3                                 |
| AXa-4-III   | 1302.3               | 489.1   | 473.3   | 0.6                | 0.2                | 1.5                | 475.0                  | 306.6                                 |
| AXa-4-I     | 1300.2               | 490.1   | 473.4   | 0.0                | -0.6               | 1.4                | 403.4                  | 322.8                                 |
| EQA-1-II    | 1144.5               | 477.8   | 407.3   | 0.0                | -1.0               | -1.4               | 394.9                  | 329.9                                 |
| EQA-2-III   | 1154.6               | 470.2   | 397.4   | 0.1                | -0.5               | 1.5                | 463.1                  | 358.4                                 |
| EQA-2-II    | 1037.8               | 569.2   | 434.4   | 2.5                | 0.1                | 0.6                | 472.2                  | 361.9                                 |
| EQC-1-II    | 1127.5               | 482.3   | 406.8   | 0.8                | -1.4               | 1.4                | 511.9                  | 363.7                                 |
| AXa-4-IV    | 995.4                | 621.1   | 472.9   | 0.8                | 1.6                | 0.9                | 487.6                  | 363.9                                 |
| EQa-3-I     | 1034.8               | 593.1   | 466.4   | 2.6                | -2.9               | -0.2               | 369.7                  | 385.6                                 |

**Table S4.** Calculated spectroscopic parameters for the lower-energy isomers of limonene-(H<sub>2</sub>O)<sub>2</sub> at B2PLYP-D3BJ/def2-TZVP level of theory.

| Name       | A <sup>a</sup> (MHz) | B (MHz) | C (MHz) | μ <sub>a</sub> (D) | μ <sub>b</sub> (D) | μ <sub>c</sub> (D) | ΔE (cm <sup>-1</sup> ) | ΔE <sub>ZPC</sub> (cm <sup>-1</sup> ) |
|------------|----------------------|---------|---------|--------------------|--------------------|--------------------|------------------------|---------------------------------------|
| EQA-3-II   | 974.4                | 608.3   | 445.5   | 2.6                | 0.6                | -0.7               | 108.1                  | 0.0                                   |
| EQC-1-I    | 1082.5               | 582.3   | 481.0   | -2.5               | 2.3                | 0.1                | 0.0                    | 13.4                                  |
| EQA-3-III  | 1233.3               | 481.3   | 434.7   | 0.2                | -0.3               | -1.5               | 178.8                  | 29.8                                  |
| EQA-4-I    | 990.7                | 581.1   | 479.6   | 0.7                | -1.6               | 1.5                | 229.9                  | 41.7                                  |
| EQA-3-I    | 970.1                | 603.1   | 447.2   | 2.8                | 0.8                | 0.4                | 194.0                  | 45.7                                  |
| EQC-3-I    | 1081.1               | 584.7   | 482.6   | 2.7                | -2.4               | -0.3               | 20.1                   | 46.5                                  |
| EQA-1-I    | 1024.5               | 606.1   | 462.8   | -2.0               | -2.2               | 0.8                | 106.3                  | 63.4                                  |
| EQA-3-IV   | 980.5                | 598.4   | 446.3   | -2.5               | 0.9                | -0.7               | 275.3                  | 72.0                                  |
| EQA-3-V    | 1229.6               | 477.9   | 433.6   | -0.7               | -0.1               | 1.2                | 242.8                  | 72.4                                  |
| EQA-4-II   | 1008.7               | 582.1   | 478.4   | -0.8               | -0.7               | -1.2               | 253.5                  | 78.6                                  |
| EQA-1-III  | 1007.4               | 616.3   | 463.9   | -2.8               | -2.3               | 0.2                | 98.3                   | 80.1                                  |
| EQC-2-I    | 1097.9               | 539.2   | 437.2   | -1.5               | -0.2               | -0.8               | 262.8                  | 84.1                                  |
| EQa-4-I    | 1016.9               | 590.5   | 488.1   | 1.6                | 0.2                | -0.9               | 255.9                  | 88.0                                  |
| EQA-4-IV/6 | 1155.3               | 493.5   | 443.7   | -0.8               | 0.4                | -1.0               | 298.8                  | 93.5                                  |
| EQC-4-I    | 968.0                | 608.1   | 447.9   | 3.0                | -0.5               | 0.2                | 237.2                  | 101.2                                 |
| EQA-4-V    | 1207.0               | 479.4   | 431.7   | -0.9               | 0.2                | -1.2               | 272.5                  | 108.4                                 |
| EQA-4-III  | 944.5                | 615.2   | 444.0   | 2.7                | 1.5                | -0.2               | 268.7                  | 112.6                                 |
| EQC-4-III  | 932.0                | 642.4   | 440.3   | -2.1               | -0.9               | 1.0                | 281.3                  | 134.3                                 |
| EQa-4-II   | 1004.6               | 595.4   | 482.8   | 1.4                | -0.8               | 1.1                | 345.2                  | 140.9                                 |
| EQA-2-I    | 1034.8               | 566.8   | 430.9   | -1.5               | 0.8                | 1.2                | 333.7                  | 150.6                                 |
| EQC-4-II   | 986.1                | 563.7   | 495.2   | 0.9                | -0.7               | 2.0                | 305.7                  | 151.9                                 |
| EQA-4-VII  | 935.2                | 618.1   | 435.8   | -2.6               | -1.7               | -0.5               | 384.3                  | 164.2                                 |
| EQC-3-II   | 1284.4               | 460.5   | 419.3   | 0.7                | 0.6                | -1.4               | 339.9                  | 172.9                                 |
| EQC-2-II   | 1098.9               | 491.6   | 451.5   | -0.3               | -0.1               | -1.6               | 313.5                  | 176.9                                 |
| EQa-3-I    | 1013.5               | 599.9   | 458.2   | 2.2                | -2.6               | 0.1                | 281.5                  | 195.8                                 |
| EQC-4-IV   | 1183.7               | 475.7   | 440.8   | -0.7               | 0.7                | 1.4                | 359.2                  | 200.6                                 |
| EQA-1-II   | 1140.0               | 477.2   | 404.8   | 0.2                | -1.1               | -1.5               | 332.4                  | 205.4                                 |
| EQA-2-II   | 1031.0               | 565.1   | 434.0   | 2.1                | 0.3                | -0.2               | 395.8                  | 212.2                                 |
| AXa-1-II   | 1341.8               | 472.4   | 457.0   | 0.4                | 0.7                | 0.9                | 357.0                  | 212.9                                 |
| AXa-1-I    | 1342.2               | 476.4   | 456.3   | 0.2                | 0.8                | 1.0                | 358.0                  | 213.1                                 |
| AXa-4-I    | 1302.7               | 488.7   | 474.7   | -0.2               | -0.3               | 1.5                | 325.4                  | 215.3                                 |
| AXa-4-II   | 1006.4               | 614.1   | 472.0   | -0.6               | 1.8                | -0.8               | 365.2                  | 241.2                                 |
| AXa-4-III  | 1295.6               | 489.7   | 472.8   | 0.6                | 0.5                | 1.3                | 379.2                  | 256.6                                 |
| EQA-2-IV   | 1142.4               | 470.8   | 399.1   | 0.5                | -0.6               | 1.7                | 419.7                  | 258.1                                 |
| EQA-2-III  | 1152.6               | 469.3   | 397.0   | 0.1                | -0.5               | 1.4                | 437.3                  | 267.3                                 |
| AXa-4-IV   | 1000.0               | 621.2   | 473.6   | 0.7                | 1.5                | 0.7                | 421.7                  | 268.2                                 |
| EQC-1-II   | 1126.0               | 482.0   | 403.7   | 0.8                | -1.5               | 1.3                | 482.8                  | 347.0                                 |
| EQC-2-III  |                      |         |         |                    |                    |                    |                        |                                       |

Not converged at B2PLYP-D3BJ/def2-TZVP level of theory

**Table S5.** Experimental spectroscopic parameters for the isotopic species of isomer 1 / EQA-3-II.

| Parameter                         | (H <sub>2</sub> <sup>18</sup> O)(H <sub>2</sub> <sup>16</sup> O) | (H <sub>2</sub> <sup>16</sup> O)(H <sub>2</sub> <sup>18</sup> O) | (H <sub>2</sub> <sup>18</sup> O)(H <sub>2</sub> <sup>18</sup> O) |
|-----------------------------------|------------------------------------------------------------------|------------------------------------------------------------------|------------------------------------------------------------------|
| A <sup>a</sup> (MHz)              | 933.1763(38)                                                     | 910.2621(12)                                                     | 897.8046(24)                                                     |
| B (MHz)                           | 589.54146(69)                                                    | 597.86601(24)                                                    | 589.52432(57)                                                    |
| C (MHz)                           | 424.99072(45)                                                    | 424.33470(17)                                                    | 417.53181(45)                                                    |
| Δ <sub>j</sub> <sup>b</sup> (kHz) | 0.1173(39)                                                       | 0.0970(14)                                                       | 0.1095(29)                                                       |
| Δ <sub>jk</sub> (kHz)             | 0.234(42)                                                        | 0.399(15)                                                        | 0.248(22)                                                        |
| δ <sub>j</sub> (kHz)              | 0.0440(27)                                                       | 0.0374(11)                                                       | 0.0386(25)                                                       |
| σ <sup>d</sup>                    | 5.7                                                              | 1.9                                                              | 2.5                                                              |
| N <sup>e</sup>                    | 38                                                               | 35                                                               | 36                                                               |

**Table S6.** Experimental spectroscopic parameters for the isotopic species of isomer 2 / EQA-4-II.

| Parameter                         | (H <sub>2</sub> <sup>18</sup> O)(H <sub>2</sub> <sup>16</sup> O) | (H <sub>2</sub> <sup>16</sup> O)(H <sub>2</sub> <sup>18</sup> O) | (H <sub>2</sub> <sup>18</sup> O)(H <sub>2</sub> <sup>18</sup> O) |
|-----------------------------------|------------------------------------------------------------------|------------------------------------------------------------------|------------------------------------------------------------------|
| A <sup>a</sup> (MHz)              | 951.0674(13)                                                     | 934.06420(85)                                                    | 919.5171(13)                                                     |
| B (MHz)                           | 570.17231(57)                                                    | 576.56319(40)                                                    | 567.95688(92)                                                    |
| C (MHz)                           | 454.84926(39)                                                    | 453.86332(32)                                                    | 447.66688(62)                                                    |
| Δ <sub>j</sub> <sup>b</sup> (kHz) | 0.1705(78)                                                       | 0.1828(46)                                                       | 0.188(10)                                                        |
| Δ <sub>jk</sub> (kHz)             | 0.781(81)                                                        | 0.985(53)                                                        | 0.686(65)                                                        |
| δ <sub>j</sub> (kHz)              | 0.0405(38)                                                       | 0.0579(25)                                                       | 0.0522(54)                                                       |
| δ <sub>k</sub> (kHz)              | 0.789(72)                                                        | 0.840(43)                                                        | 0.900(97)                                                        |
| σ <sup>d</sup>                    | 4.6                                                              | 4.4                                                              | 5.7                                                              |
| N <sup>e</sup>                    | 33                                                               | 41                                                               | 35                                                               |

**Table S7.** Experimental spectroscopic parameters for the isotopic species of isomer 3 / EQC-4-I.

| Parameter                         | (H <sub>2</sub> <sup>18</sup> O)(H <sub>2</sub> <sup>16</sup> O) | (H <sub>2</sub> <sup>16</sup> O)(H <sub>2</sub> <sup>18</sup> O) | (H <sub>2</sub> <sup>18</sup> O)(H <sub>2</sub> <sup>18</sup> O) |
|-----------------------------------|------------------------------------------------------------------|------------------------------------------------------------------|------------------------------------------------------------------|
| A <sup>a</sup> (MHz)              | 903.4523(27)                                                     | 888.6196(24)                                                     | 871.1300(20)                                                     |
| B (MHz)                           | 599.20014(23)                                                    | 602.25182(26)                                                    | 597.61671(28)                                                    |
| C (MHz)                           | 429.94788(22)                                                    | 428.69218(21)                                                    | 422.27315(26)                                                    |
| Δ <sub>j</sub> <sup>b</sup> (kHz) | 0.0554(30)                                                       | 0.0565(36)                                                       | 0.0580(26)                                                       |
| Δ <sub>jk</sub> (kHz)             | 0.831(18)                                                        | 0.8947(18)                                                       | 0.823(20)                                                        |
| δ <sub>j</sub> (kHz)              | [-0.006]                                                         | [-0.006]                                                         | [-0.006]                                                         |
| δ <sub>k</sub> (kHz)              | 0.418(30)                                                        | 0.485(32)                                                        | 0.429(38)                                                        |
| σ <sup>d</sup>                    | 3.6                                                              | 3.2                                                              | 4.2                                                              |
| N <sup>e</sup>                    | 40                                                               | 31                                                               | 37                                                               |

**Table S8.** Experimental spectroscopic parameters for the isotopic species of isomer 4 / EQC-1-I.

| Parameter                         | (H <sub>2</sub> <sup>18</sup> O)(H <sub>2</sub> <sup>16</sup> O) | (H <sub>2</sub> <sup>16</sup> O)(H <sub>2</sub> <sup>18</sup> O) |
|-----------------------------------|------------------------------------------------------------------|------------------------------------------------------------------|
| A <sup>a</sup> (MHz)              | 990.092(17)                                                      | 991.486(18)                                                      |
| B (MHz)                           | 577.2998(22)                                                     | 576.5887(17)                                                     |
| C (MHz)                           | 455.69130(51)                                                    | 455.68055(76)                                                    |
| Δ <sub>j</sub> <sup>b</sup> (kHz) | [0.0116]                                                         | [0.0116]                                                         |
| Δ <sub>jk</sub> (kHz)             | [1.048]                                                          | [1.048]                                                          |
| σ <sup>d</sup>                    | 9.1                                                              | 5.3                                                              |
| N <sup>e</sup>                    | 10                                                               | 8                                                                |

**Table S9.** Experimental spectroscopic parameters for the isotopic species of isomer 5 / EQC-2-I.

| Parameter                         | (H <sub>2</sub> <sup>18</sup> O)(H <sub>2</sub> <sup>16</sup> O) | (H <sub>2</sub> <sup>16</sup> O)(H <sub>2</sub> <sup>18</sup> O) | (H <sub>2</sub> <sup>18</sup> O)(H <sub>2</sub> <sup>18</sup> O) |
|-----------------------------------|------------------------------------------------------------------|------------------------------------------------------------------|------------------------------------------------------------------|
| A <sup>a</sup> (MHz)              | 1035.2487(76)                                                    | 1010.6869(73)                                                    | 1001.4047(94)                                                    |
| B (MHz)                           | 524.50158(60)                                                    | 533.94459(73)                                                    | 522.5763(11)                                                     |
| C (MHz)                           | 414.96815(56)                                                    | 417.87349(54)                                                    | 409.48791(93)                                                    |
| Δ <sub>j</sub> <sup>b</sup> (kHz) | 0.1099(23)                                                       | 0.1053(39)                                                       | 0.1165(52)                                                       |
| δ <sub>j</sub> (kHz)              | 0.0309(26)                                                       | 0.0305(36)                                                       | 0.0350(57)                                                       |
| σ <sup>d</sup>                    | 5.4                                                              | 4.7                                                              | 7.0                                                              |
| N <sup>e</sup>                    | 35                                                               | 30                                                               | 25                                                               |

**Table S10.** Experimental spectroscopic parameters for the isotopic species of **isomer 6 / EQa-4-I.**

| Parameter                         | (H <sub>2</sub> <sup>18</sup> O)(H <sub>2</sub> <sup>16</sup> O) | (H <sub>2</sub> <sup>16</sup> O)(H <sub>2</sub> <sup>18</sup> O) | (H <sub>2</sub> <sup>18</sup> O)(H <sub>2</sub> <sup>18</sup> O) |
|-----------------------------------|------------------------------------------------------------------|------------------------------------------------------------------|------------------------------------------------------------------|
| A <sup>a</sup> (MHz)              | 952.445(12)                                                      | 937.1582(92)                                                     | 920.031(15)                                                      |
| B (MHz)                           | 577.61355(77)                                                    | 585.33491(89)                                                    | 577.3785(12)                                                     |
| C (MHz)                           | 466.44558(69)                                                    | 464.10488(58)                                                    | 458.64240(83)                                                    |
| Δ <sub>J</sub> <sup>b</sup> (kHz) | 0.084(10)                                                        | 0.0782(80)                                                       | 0.060(16)                                                        |
| Δ <sub>JK</sub> (kHz)             | [0.531]                                                          | [0.531]                                                          | [0.531]                                                          |
| δ <sub>K</sub> (kHz)              | [0.542]                                                          | [0.542]                                                          | [0.542]                                                          |
| σ <sup>d</sup>                    | 6.9                                                              | 7.0                                                              | 6.6                                                              |
| N <sup>e</sup>                    | 15                                                               | 14                                                               | 11                                                               |

**Table S11.** Experimental spectroscopic parameters for the isotopic species of **isomer 7 / EQA-2-I.**

| Parameter                         | (H <sub>2</sub> <sup>18</sup> O)(H <sub>2</sub> <sup>16</sup> O) | (H <sub>2</sub> <sup>16</sup> O)(H <sub>2</sub> <sup>18</sup> O) | (H <sub>2</sub> <sup>18</sup> O)(H <sub>2</sub> <sup>18</sup> O) |
|-----------------------------------|------------------------------------------------------------------|------------------------------------------------------------------|------------------------------------------------------------------|
| A <sup>a</sup> (MHz)              | 983.9449(75)                                                     | 960.2550(48)                                                     | 951.2087(59)                                                     |
| B (MHz)                           | 544.6077(11)                                                     | 555.14250(83)                                                    | 543.03954(47)                                                    |
| C (MHz)                           | 407.53152(71)                                                    | 409.51888(65)                                                    | 401.58818(53)                                                    |
| Δ <sub>J</sub> <sup>b</sup> (kHz) | 0.1074(52)                                                       | 0.1154(37)                                                       | 0.1108(62)                                                       |
| Δ <sub>K</sub> (kHz)              | [1.40]                                                           | [1.40]                                                           | [1.40]                                                           |
| δ <sub>J</sub> (kHz)              | 0.0252(45)                                                       | 0.0253(39)                                                       | 0.0247(53)                                                       |
| δ <sub>K</sub> (kHz)              | [0.147]                                                          | [0.147]                                                          | [0.147]                                                          |
| σ <sup>d</sup>                    | 6.0                                                              | 5.5                                                              | 6.9                                                              |
| N <sup>e</sup>                    | 27                                                               | 28                                                               | 24                                                               |

**Table S12.** Experimental coordinates of the water oxygen atoms for the observed limonene-(H<sub>2</sub>O)<sub>2</sub> complexes compared with possible equilibrium structures from MP2 and B3LYP-D3BJ calculations using the 6-311++G(d,p) basis set.

|                 | Isomer 1             | EQA-3-II             |                    | EQA-3-I          |       | EQA-3-IV |        | EQC-4-I |       | EQ1-4 W3 |       |
|-----------------|----------------------|----------------------|--------------------|------------------|-------|----------|--------|---------|-------|----------|-------|
|                 |                      | <i>r<sub>s</sub></i> | B3LYP <sup>c</sup> | MP2 <sup>d</sup> | B3LYP | MP2      | B3LYP  | MP2     | B3LYP | MP2      | B3LYP |
|                 |                      | O1                   |                    | O1               |       | O1       |        | O1      |       | O1       |       |
| a  <sup>a</sup> | 2.41601(64)          | 2.155                | 2.165              | 2.273            | 2.373 | 2.260    | 2.3023 | 1.810   | 1.779 | 1.949    | 1.904 |
| b               | 2.02680(76)          | 2.113                | 2.100              | 2.046            | 1.994 | 2.049    | 2.0379 | 2.408   | 2.404 | 2.342    | 2.351 |
| c               | 0.2471(63)           | 0.421                | 0.433              | 0.494            | 0.394 | 0.584    | 0.5464 | 0.045   | 0.070 | 0.245    | 0.325 |
|                 |                      | O2                   |                    | O2               |       | O2       |        | O2      |       | O2       |       |
| a               | 0.00(14)             | 0.327                | 0.328              | 0.094            | 0.058 | 0.036    | 0.0272 | 0.863   | 0.881 | 0.641    | 0.670 |
| b               | 3.29759(46)          | 3.262                | 3.260              | 3.157            | 3.195 | 3.154    | 3.2109 | 3.036   | 3.037 | 3.285    | 3.316 |
| c               | 0.1559(97)           | 0.262                | 0.310              | 0.549            | 0.461 | 0.619    | 0.5904 | 0.707   | 0.733 | 0.406    | 0.457 |
|                 | <b>Isomer 2</b>      | <b>EQA-4-II</b>      |                    | <b>EQA-4-I</b>   |       |          |        |         |       |          |       |
|                 | <i>r<sub>s</sub></i> | B3LYP                | MP2                | B3LYP            | MP2   |          |        |         |       |          |       |
|                 |                      | O1                   |                    | O1               |       |          |        |         |       |          |       |
| a  <sup>a</sup> | 2.21868(68)          | 2.206                | 2.207              | 1.979            | 1.876 |          |        |         |       |          |       |
| b               | 1.75027(87)          | 1.703                | 1.762              | 1.591            | 1.745 |          |        |         |       |          |       |
| c               | 1.2422(12)           | 1.328                | 1.241              | 1.492            | 1.428 |          |        |         |       |          |       |
|                 |                      | O2                   |                    | O2               |       |          |        |         |       |          |       |
| a               | 0.8278(18)           | 1.040                | 0.838              | 1.696            | 1.219 |          |        |         |       |          |       |
| b               | 2.91887(52)          | 2.718                | 2.780              | 2.664            | 2.773 |          |        |         |       |          |       |
| c               | 0.9459(16)           | 1.023                | 1.026              | 1.100            | 1.141 |          |        |         |       |          |       |
|                 | <b>Isomer 3</b>      | <b>EQC-4-I</b>       |                    |                  |       |          |        |         |       |          |       |
|                 | <i>r<sub>s</sub></i> | B3LYP                | MP2                |                  |       |          |        |         |       |          |       |
|                 |                      | O1                   |                    |                  |       |          |        |         |       |          |       |
| a  <sup>a</sup> | 1.81352(84)          | 1.810                | 1.779              |                  |       |          |        |         |       |          |       |
| b               | 2.42823(63)          | 2.408                | 2.404              |                  |       |          |        |         |       |          |       |
| c               | 0.030(51)            | 0.045                | 0.070              |                  |       |          |        |         |       |          |       |
|                 |                      | O2                   |                    |                  |       |          |        |         |       |          |       |
| a               | 0.8932(17)           | 0.863                | 0.881              |                  |       |          |        |         |       |          |       |
| b               | 3.17782(48)          | 3.036                | 3.037              |                  |       |          |        |         |       |          |       |
| c               | 0.6607(23)           | 0.707                | 0.732              |                  |       |          |        |         |       |          |       |
|                 | <b>Isomer 4</b>      | <b>EQC-1-I</b>       |                    | <b>EQC-3-I</b>   |       |          |        |         |       |          |       |
|                 | <i>r<sub>s</sub></i> | B3LYP                | MP2                | B3LYP            | MP2   |          |        |         |       |          |       |
|                 |                      | O1                   |                    | O1               |       |          |        |         |       |          |       |
| a  <sup>a</sup> | 1.56268(99)          | 1.693                | 1.499              | 1.210            | 1.123 |          |        |         |       |          |       |
| b               | 2.64337(59)          | 2.466                | 2.546              | 2.511            | 2.554 |          |        |         |       |          |       |
| c               | 0.2860(55)           | 0.379                | 0.395              | 0.315            | 0.303 |          |        |         |       |          |       |
|                 |                      | O2                   |                    | O2               |       |          |        |         |       |          |       |
| a               | 1.4114(11)           | 1.157                | 1.413              | 1.625            | 1.753 |          |        |         |       |          |       |
| b               | 2.72564(58)          | 2.708                | 2.684              | 2.663            | 2.694 |          |        |         |       |          |       |
| c               | 0.000(19)            | 0.196                | 0.112              | 0.352            | 0.334 |          |        |         |       |          |       |
|                 | <b>Isomer 5</b>      | <b>EQC-2-I</b>       |                    | <b>EQC-2-III</b> |       |          |        |         |       |          |       |
|                 | <i>r<sub>s</sub></i> | B3LYP                | MP2                | B3LYP            | MP2   |          |        |         |       |          |       |
|                 |                      | O1                   |                    | O1               |       |          |        |         |       |          |       |
| a  <sup>a</sup> | 3.18344(51)          | 3.114                | 3.111              | 2.045            | 3.029 |          |        |         |       |          |       |
| b               | 1.5975(10)           | 1.657                | 1.639              | 2.453            | 1.700 |          |        |         |       |          |       |
| c               | 0.2966(56)           | 0.234                | 0.333              | 0.465            | 0.381 |          |        |         |       |          |       |
|                 |                      | O2                   |                    | O2               |       |          |        |         |       |          |       |
| a               | 0.8856(18)           | 0.790                | 0.822              | 0.587            | 0.765 |          |        |         |       |          |       |
| b               | 2.75224(60)          | 2.659                | 2.622              | 2.757            | 2.670 |          |        |         |       |          |       |
| c               | 0.9857(17)           | 1.032                | 1.057              | 0.786            | 1.071 |          |        |         |       |          |       |
|                 | <b>Isomer 6</b>      | <b>EQa-4-I</b>       |                    | <b>EQA-4-II</b>  |       |          |        |         |       |          |       |
|                 | <i>r<sub>s</sub></i> | B3LYP                | MP2                | B3LYP            | MP2   |          |        |         |       |          |       |
|                 |                      | O1                   |                    | O1               |       |          |        |         |       |          |       |
| a  <sup>a</sup> | 1.90799(96)          | 1.946                | 1.937              | 1.939            | 1.781 |          |        |         |       |          |       |
| b               | 1.7305(11)           | 1.632                | 1.676              | 1.581            | 1.661 |          |        |         |       |          |       |
| c               | 1.5120(12)           | 1.590                | 1.541              | 1.631            | 1.643 |          |        |         |       |          |       |
|                 |                      | O2                   |                    | O2               |       |          |        |         |       |          |       |
| a               | 0.122(14)            | 0.411                | 0.374              | 0.612            | 0.479 |          |        |         |       |          |       |
| b               | 3.07631(57)          | 2.937                | 2.954              | 2.924            | 2.934 |          |        |         |       |          |       |
| c               | 0.3053(59)           | 0.383                | 0.468              | 0.460            | 0.544 |          |        |         |       |          |       |

**Table S12 (cont.).** Experimental coordinates of the water oxygen atoms for the observed limonene-(H<sub>2</sub>O)<sub>2</sub> complexes compared with possible equilibrium structures from MP2 and B3LYP-D3BJ calculations using the 6-311++G(d,p) basis set.

| Isomer 7                | EQA-2-I              |       | EQA-2-II |       | EQC-2-III |       |       |
|-------------------------|----------------------|-------|----------|-------|-----------|-------|-------|
|                         | <i>r<sub>c</sub></i> | B3LYP | MP2      | B3LYP | MP2       | B3LYP | MP2   |
|                         |                      | O1    |          | O1    |           | O1    |       |
| <i>a</i>   <sup>a</sup> | 3.13337(52)          | 3.057 | 3.091    | 2.919 | 2.917     | 2.045 | 3.029 |
| <i>b</i>                | 1.6332(10)           | 1.748 | 1.720    | 1.717 | 1.706     | 2.453 | 1.700 |
| <i>c</i>                | 0.4568(36)           | 0.308 | 0.264    | 0.550 | 0.577     | 0.465 | 0.381 |
|                         |                      | O2    |          | O2    |           | O2    |       |
| <i>a</i>                | 0.8678(18)           | 0.668 | 0.698    | 0.697 | 0.708     | 0.587 | 0.765 |
| <i>b</i>                | 2.94549(54)          | 2.943 | 3.029    | 2.855 | 2.862     | 2.757 | 2.670 |
| <i>c</i>                | 0.7069(23)           | 0.611 | 0.556    | 0.806 | 0.833     | 0.786 | 1.071 |

<sup>a</sup> Absolute co-ordinate values in Å along the principal axis. <sup>b</sup> *r<sub>s</sub>* co-ordinate values determined using Kraitchman equations given with costain errors. <sup>c</sup> Co-ordinates determined using B3LYP-D3BJ/6-311++G(d,p) calculation. <sup>d</sup> Co-ordinates determined using MP2/6-311++G(d,p) calculation.

**Table S13.** Intermolecular stabilising energy contributions ( $\geq 0.42$  kJ mol<sup>-1</sup>) for **isomer 1 / EQA-3-II** of limonene-(H<sub>2</sub>O)<sub>2</sub> from Natural Bond Orbital (NBO) analysis at the B3LYP-D3BJ/6-311++G(d,p) level of theory.

| From Limonene to Water1 |               |        |
|-------------------------|---------------|--------|
| Donor                   | Acceptor      | kJ/mol |
| BD(1)C3-C4              | RY*(1)H30     | 0.63   |
| BD(1)C3-C4              | RY*(2)H30     | 0.42   |
| BD(1)C3-C4              | RY*(4)H30     | 0.46   |
| BD(2)C3-C4              | RY*(4)H30     | 1.00   |
| BD(2)C3-C4              | BD*(1)O11-H30 | 21.42  |
| BD(1)C6-H19             | RY*(1)O11     | 0.46   |
| From Limonene to Water2 |               |        |
| Donor                   | Acceptor      | kJ/mol |
| BD(1)C2-H16             | RY*(1)O12     | 0.71   |
| BD(1)C2-H16             | BD*(1)O12-H31 | 0.50   |
| From Water1 to Limonene |               |        |
| Donor                   | Acceptor      | kJ/mol |
| LP(1)O11                | BD*(2)C3-C4   | 0.54   |
| LP(2)O11                | BD*(2)C3-C4   | 0.59   |
| From Water1 to Water2   |               |        |
| Donor                   | Acceptor      | kJ/mol |
| LP(1)O11                | BD*(1)O12-H32 | 0.92   |
| LP(2)O11                | RY*(2)O12     | 0.46   |
| LP(2)O11                | RY*(5)H32     | 0.46   |
| LP(2)O11                | BD*(1)O12-H32 | 45.44  |
| From Water2 to Limonene |               |        |
| Donor                   | Acceptor      | kJ/mol |
| BD(1)O12-H31            | RY*(1)H16     | 2.97   |
| BD(1)O12-H31            | RY*(3)H16     | 0.63   |
| BD(1)O12-H32            | RY*(1)H16     | 0.46   |
| BD(1)O12-H32            | BD*(1)C2-H16  | 0.50   |
| LP(1)O12                | BD*(1)C2-H16  | 1.05   |
| LP(2)O12                | RY*(1)H22     | 0.46   |
| LP(2)O12                | BD*(1)C2-H16  | 2.76   |
| LP(2)O12                | BD*(1)C10-H22 | 7.36   |

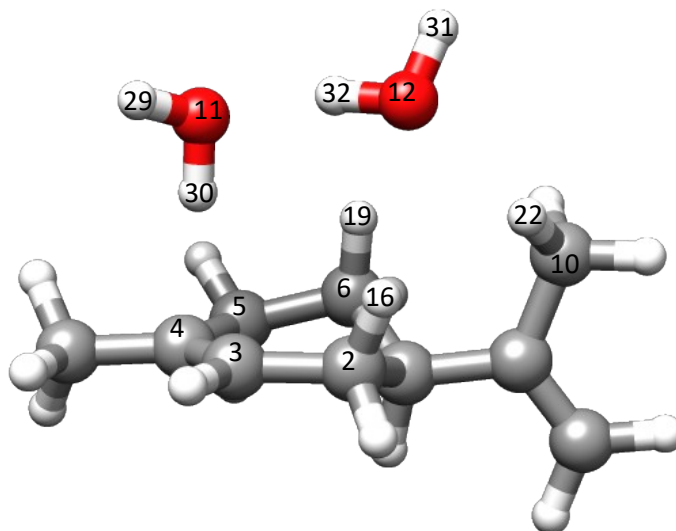



**Table S14.** Intermolecular stabilising energy contributions ( $\geq 0.42$  kJ mol<sup>-1</sup>) for **isomer 2 / EQA-4-II** of limonene-(H<sub>2</sub>O)<sub>2</sub> from Natural Bond Orbital (NBO) analysis at the B3LYP-D3BJ/6-311++G(d,p) level of theory.

| From Limonene to Water1 |               |        |
|-------------------------|---------------|--------|
| Donor                   | Acceptor      | kJ/mol |
| BD(1)C4-C5              | RY*(1)H30     | 0.50   |
| BD(1)C4-C5              | RY*(2)H30     | 0.50   |
| BD(1)C4-C5              | RY*(4)H30     | 0.50   |
| BD(2)C4-C5              | RY*(4)H30     | 0.88   |
| BD(2)C4-C5              | BD*(1)O11-H30 | 20.33  |
| From Limonene to Water2 |               |        |
| Donor                   | Acceptor      | kJ/mol |
| BD(1)C2-H17             | BD*(1)O12-H31 | 0.59   |
| From Water1 to Water2   |               |        |
| Donor                   | Acceptor      | kJ/mol |
| LP(1)O11                | BD*(1)O12-H32 | 0.59   |
| LP(2)O11                | RY*(5)H32     | 0.42   |
| LP(2)O11                | BD*(1)O12-H32 | 44.10  |
| From Water2 to Limonene |               |        |
| Donor                   | Acceptor      | kJ/mol |
| BD(1)O12-H31            | RY*(1)H13     | 0.42   |
| LP(1)O12                | BD*(1)C2-H17  | 2.51   |
| BD(1)O12-H31            | RY*(1)H17     | 2.64   |
| BD(1)O12-H32            | RY*(1)H17     | 0.46   |
| BD(1)O12-H32            | BD*(1)C2-H17  | 0.63   |
| LP(2)O12                | BD*(1)C6-H13  | 5.52   |
| From Water2 to Water1   |               |        |
| Donor                   | Acceptor      | kJ/mol |
| BD(1)O12-H32            | BD*(1)O11-H29 | 0.42   |

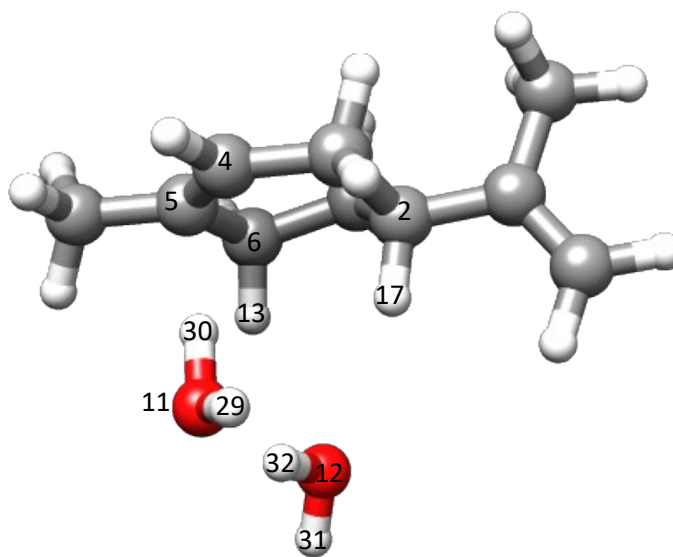

**Table S15.** Intermolecular stabilising energy contributions ( $\geq 0.42$  kJ mol<sup>-1</sup>) for **isomer 3 / EQC-4-I** of limonene-(H<sub>2</sub>O)<sub>2</sub> from Natural Bond Orbital (NBO) analysis at the B3LYP-D3BJ/6-311++G(d,p) level of theory.

| From Limonene to Water1 |               |        |
|-------------------------|---------------|--------|
| Donor                   | Acceptor      | kJ/mol |
| BD(1)C1-C6              | RY*(1)H30     | 0.75   |
| BD(1)C1-C6              | RY*(4)H30     | 0.50   |
| BD(2)C1-C6              | RY*(4)H30     | 0.96   |
| BD(2)C1-C6              | BD*(1)O11-H30 | 20.50  |
| From Water1 to Limonene |               |        |
| Donor                   | Acceptor      | kJ/mol |
| LP(1)O11                | BD*(2)C1-C6   | 0.84   |
| From Water1 to Water2   |               |        |
| Donor                   | Acceptor      | kJ/mol |
| LP(2)O11                | BD*(1)O12-H31 | 44.81  |
| LP(1)O11                | BD*(1)O12-H31 | 0.88   |
| LP(2)O11                | RY*(2)O12     | 0.63   |
| From Water2 to Limonene |               |        |
| Donor                   | Acceptor      | kJ/mol |
| BD(1)O12-H31            | RY*(1)H17     | 0.84   |
| BD(1)O12-H31            | RY*(1)H22     | 0.88   |
| BD(1)O12-H31            | BD*(1)C4-H17  | 0.79   |
| BD(1)O12-H32            | RY*(1)H22     | 0.50   |
| LP(1)O12                | BD*(1)C8-H22  | 2.09   |
| LP(2)O12                | RY*(1)H17     | 0.46   |
| LP(2)O12                | BD*(1)C4-H17  | 5.56   |
| LP(2)O12                | BD*(1)C8-H22  | 2.68   |

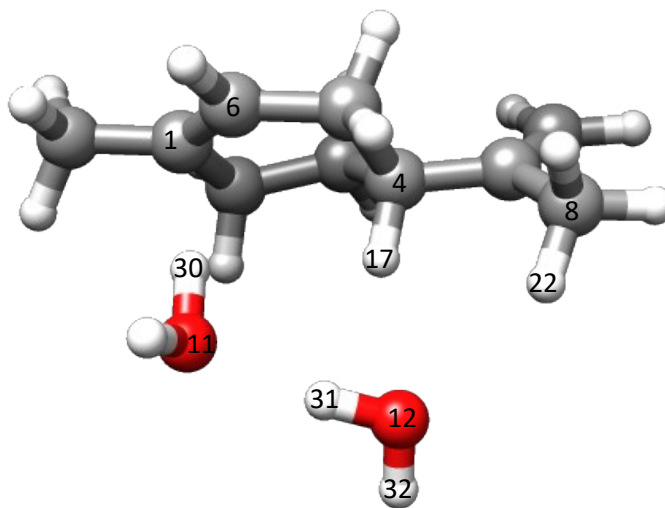

**Table S16.** Intermolecular stabilising energy contributions ( $\geq 0.42$  kJ mol<sup>-1</sup>) for **isomer 4 / EQC-1-I** of limonene-(H<sub>2</sub>O)<sub>2</sub> from Natural Bond Orbital (NBO) analysis at the B3LYP-D3BJ/6-311++G(d,p) level of theory.

| From Limonene to Water1 |               |        |
|-------------------------|---------------|--------|
| Donor                   | Acceptor      | kJ/mol |
| BD(1)C3-H16             | RY*(1)O11     | 0.79   |
| BD(1)C3-H16             | BD*(1)O11-H29 | 0.71   |
| BD(1)C7-C10             | RY*(1)H30     | 0.79   |
| BD(2)C7-C10             | BD*(1)O11-H30 | 15.82  |
| BD(1)C7-C10             | RY*(4)H30     | 0.42   |
| BD(2)C7-C10             | RY*(4)H30     | 0.50   |
| From Limonene to Water2 |               |        |
| Donor                   | Acceptor      | kJ/mol |
| BD(1)C4-C5              | RY*(3)H31     | 0.50   |
| BD(2)C4-C5              | BD*(1)O12-H31 | 5.69   |
| From Water1 to Limonene |               |        |
| Donor                   | Acceptor      | kJ/mol |
| BD(1)O11-H29            | RY*(1)H16     | 2.80   |
| BD(1)O11-H29            | RY*(4)H16     | 0.59   |
| BD(1)O11-H30            | BD*(1)C3-H16  | 0.42   |
| LP(1)O11                | BD*(1)C3-H16  | 2.55   |
| LP(1)O11                | BD*(2)C7-C10  | 0.67   |
| LP(2)O11                | BD*(1)C3-H16  | 0.96   |
| From Water1 to Water2   |               |        |
| Donor                   | Acceptor      | kJ/mol |
| LP(2)O11                | RY*(3)O12     | 0.46   |
| LP(2)O11                | BD*(1)O12-H32 | 30.08  |
| From Water2 to Limonene |               |        |
| Donor                   | Acceptor      | kJ/mol |
| BD(1)O12-H31            | RY*(1)H19     | 0.50   |
| BD(1)O12-H32            | RY*(1)H19     | 0.54   |
| BD(1)O12-H32            | BD*(1)C1-H19  | 0.46   |
| LP(2)O12                | BD*(1)C1-H19  | 2.89   |

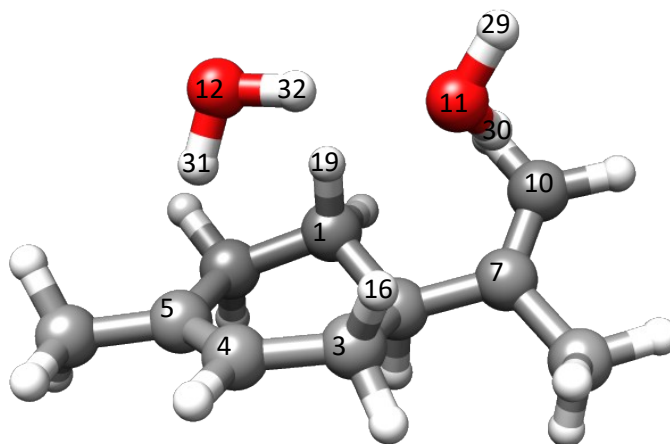

**Table S17.** Intermolecular stabilising energy contributions ( $\geq 0.42$  kJ mol<sup>-1</sup>) for **isomer 5 / EQC-2-I** of limonene-(H<sub>2</sub>O)<sub>2</sub> from Natural Bond Orbital (NBO) analysis at the B3LYP-D3BJ/6-311++G(d,p) level of theory.

| From Limonene to Water1 |               |        |
|-------------------------|---------------|--------|
| Donor                   | Acceptor      | kJ/mol |
| BD(1)C8-C9              | RY*(1)H30     | 0.96   |
| BD(1)C8-C9              | RY*(4)H30     | 0.59   |
| BD(2)C8-C9              | RY*(4)H30     | 0.71   |
| BD(2)C8-C9              | BD*(1)O11-H30 | 20.59  |
| From Water1 to Limonene |               |        |
| Donor                   | Acceptor      | kJ/mol |
| LP(2)O11                | BD*(2)C8-C9   | 0.63   |
| From Water1 to Water2   |               |        |
| Donor                   | Acceptor      | kJ/mol |
| LP(1)O11                | BD*(1)O12-H31 | 0.54   |
| LP(2)O11                | RY*(2)O12     | 0.46   |
| LP(2)O11                | RY*(3)O12     | 0.46   |
| LP(2)O11                | BD*(1)O12-H31 | 43.51  |
| From Water2 to Limonene |               |        |
| Donor                   | Acceptor      | kJ/mol |
| BD(1)O12-H31            | RY*(1)H13     | 0.42   |
| BD(1)O12-H32            | RY*(1)H13     | 0.79   |
| LP(1)O12                | BD*(1)C5-H13  | 2.18   |
| LP(2)O12                | RY*(2)H17     | 0.42   |
| LP(2)O12                | BD*(1)C1-H17  | 3.93   |
| LP(2)O12                | BD*(1)C5-H13  | 0.79   |
| From Water2 to Water1   |               |        |
| Donor                   | Acceptor      | kJ/mol |
| BD(1)O12-H31            | BD*(1)O11-H29 | 0.46   |

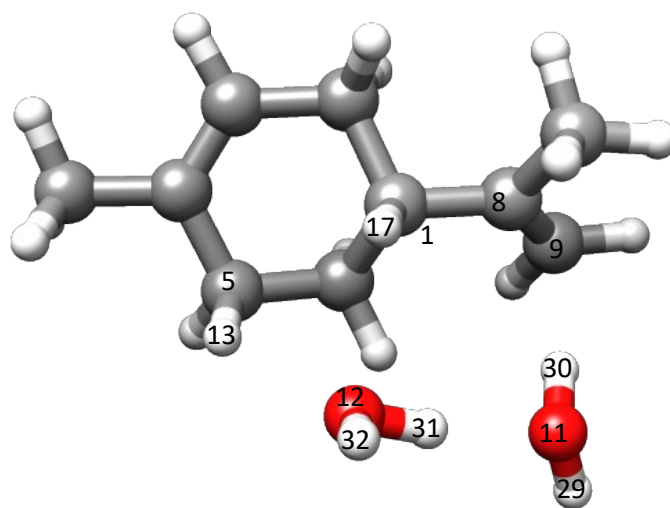

**Table S18.** Intermolecular stabilising energy contributions ( $\geq 0.42$  kJ mol<sup>-1</sup>) for **isomer 6 / EQa-4-I** of limonene-(H<sub>2</sub>O)<sub>2</sub> from Natural Bond Orbital (NBO) analysis at the B3LYP-D3BJ/6-311++G(d,p) level of theory.

| From Limonene to Water1 |               |        |
|-------------------------|---------------|--------|
| Donor                   | Acceptor      | kJ/mol |
| BD(1)C4-C5              | RY*(1)H32     | 0.67   |
| BD(1)C4-C5              | RY*(4)H32     | 0.50   |
| BD(2)C4-C5              | RY*(4)H32     | 0.88   |
| BD(2)C4-C5              | BD*(1)O11-H32 | 20.08  |
| From Limonene to Water2 |               |        |
| Donor                   | Acceptor      | kJ/mol |
| BD(1)C1-H18             | BD*(1)O12-H30 | 0.75   |
| From Water1 to Limonene |               |        |
| Donor                   | Acceptor      | kJ/mol |
| LP(2)O11                | BD*(1)C1-H18  | 0.46   |
| From Water1 to Water2   |               |        |
| Donor                   | Acceptor      | kJ/mol |
| LP(1)O11                | BD*(1)O12-H29 | 0.67   |
| LP(2)O11                | RY*(5)H29     | 0.50   |
| LP(2)O11                | BD*(1)O12-H29 | 43.56  |
| From Water2 to Limonene |               |        |
| Donor                   | Acceptor      | kJ/mol |
| BD(1)O12-H29            | RY*(1)H18     | 0.67   |
| BD(1)O12-H29            | BD*(1)C1-H18  | 0.84   |
| LP(1)O12                | BD*(1)C1-H18  | 2.59   |
| LP(2)O12                | BD*(1)C3-H26  | 3.81   |
| BD(1)O12-H30            | RY*(1)H18     | 2.85   |
| From Water2 to Water1   |               |        |
| Donor                   | Acceptor      | kJ/mol |
| BD(1)O12-H29            | BD*(1)O11-H31 | 0.46   |

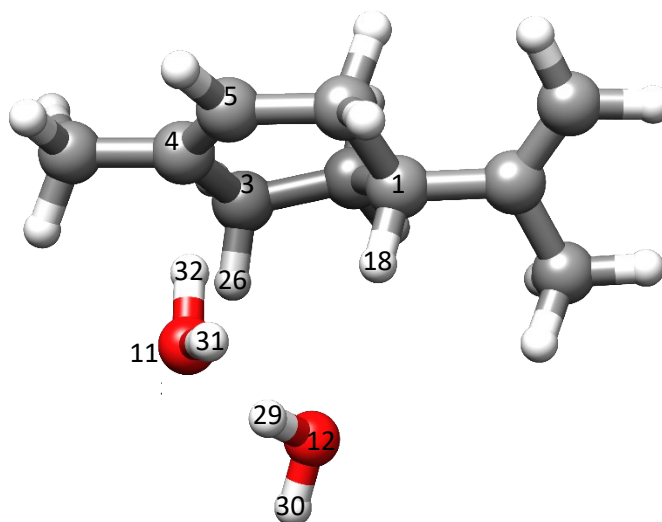

**Table S19.** Intermolecular stabilising energy contributions ( $\geq 0.42$  kJ mol<sup>-1</sup>) for **isomer 7 / EQA-2-I** of limonene-(H<sub>2</sub>O)<sub>2</sub> from Natural Bond Orbital (NBO) analysis at the B3LYP-D3BJ/6-311++G(d,p) level of theory.

| From Limonene to Water1 |               |        |
|-------------------------|---------------|--------|
| Donor                   | Acceptor      | kJ/mol |
| BD(1)C8-C9              | RY*(1)H30     | 1.05   |
| BD(1)C8-C9              | RY*(4)H30     | 0.50   |
| BD(2)C8-C9              | RY*(4)H30     | 0.67   |
| BD(2)C8-C9              | BD*(1)O11-H30 | 20.17  |
| From Water1 to Water2   |               |        |
| Donor                   | Acceptor      | kJ/mol |
| BD(1)O11-H29            | RY*(2)H31     | 0.46   |
| LP(1)O11                | BD*(1)O12-H31 | 1.17   |
| LP(2)O11                | RY*(2)O12     | 0.50   |
| LP(2)O11                | RY*(4)O12     | 0.42   |
| LP(2)O11                | BD*(1)O12-H31 | 42.59  |
| From Water2 to Limonene |               |        |
| Donor                   | Acceptor      | kJ/mol |
| BD(1)O12-H31            | RY*(1)H13     | 0.54   |
| BD(1)O12-H32            | RY*(1)H13     | 1.09   |
| LP(1)O12                | BD*(1)C3-H13  | 1.38   |
| LP(2)O12                | BD*(1)C3-H13  | 3.60   |
| LP(2)O12                | BD*(1)C5-H17  | 1.26   |
| From Water2 to Water1   |               |        |
| Donor                   | Acceptor      | kJ/mol |
| BD(1)O12-H31            | BD*(1)O11-H29 | 0.46   |
| LP(1)O12                | RY*(1)O11     | 0.46   |

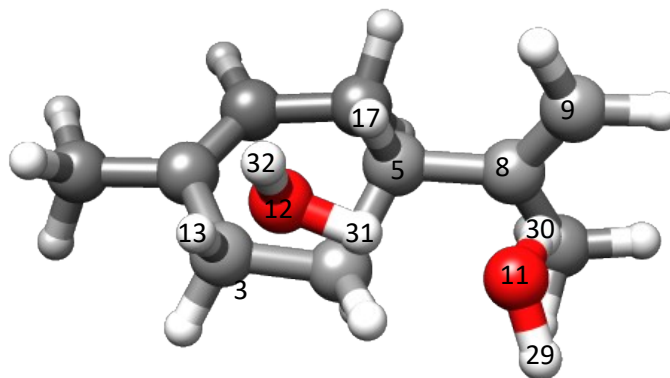

**Figure S1.** Plots of the reduced density gradient (RDG) versus  $\text{sign}(\lambda_2)\rho$  for the observed isomers of limonene-(H<sub>2</sub>O)<sub>2</sub>.

**EQA-3-II**

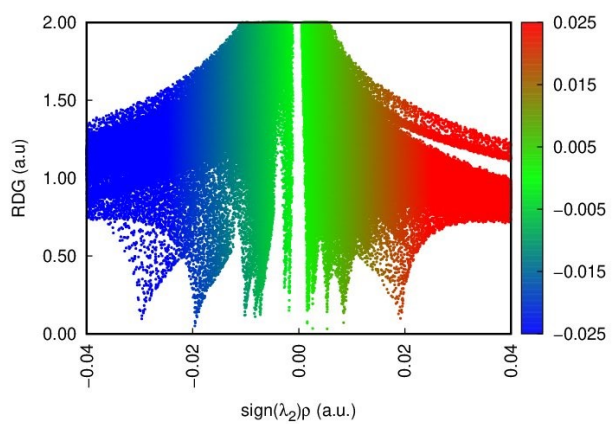

**EQA-4-II**

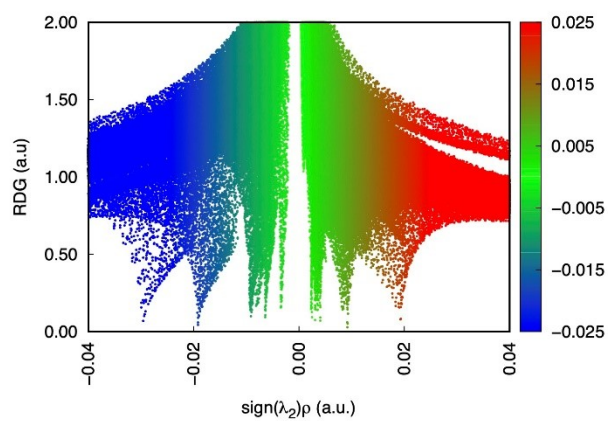

**EQC-4-I**

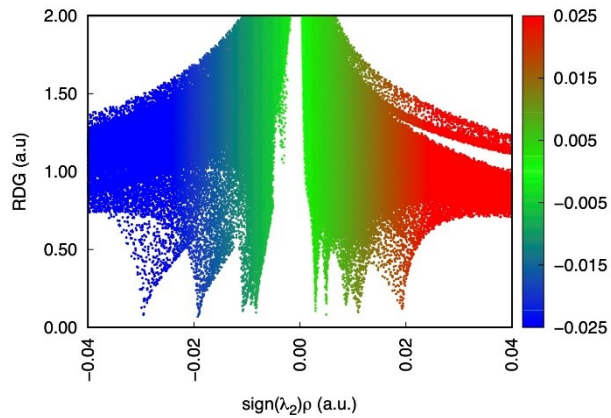

**EQC-1-I**

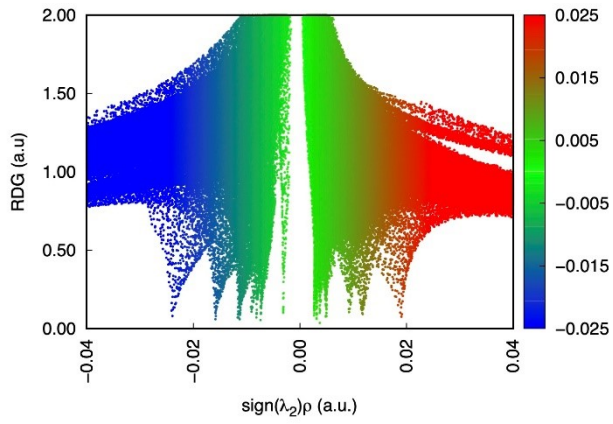

**EQC-2-I**

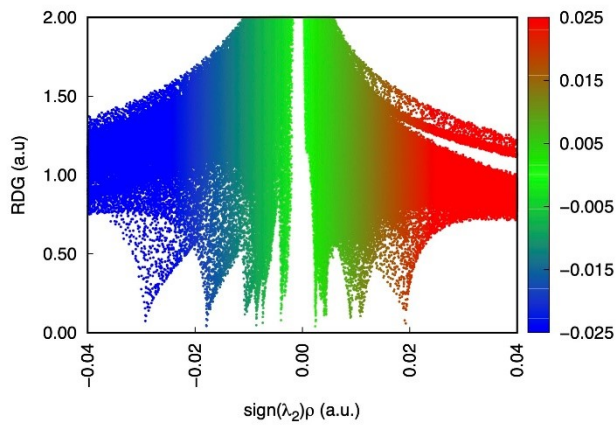

**EQa-4-I**

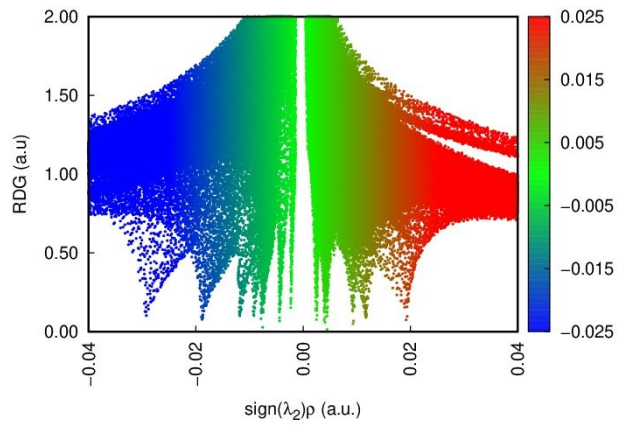



### EQA-2-I

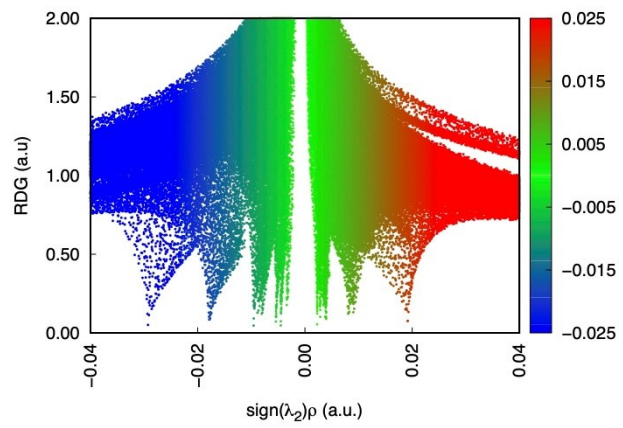

**Table S20.** Cartesian coordinates of **isomer 1 / EQA-3-II** from B3LYP-D3BJ/6-311++G(d,p) calculations.

|   | X        | Y        | Z        |
|---|----------|----------|----------|
| C | -1.00074 | -0.96339 | -0.09599 |
| C | -0.26148 | -0.21792 | -1.22471 |
| C | 1.22332  | -0.46932 | -1.19283 |
| C | 1.88246  | -1.00457 | -0.15521 |
| C | 1.16881  | -1.36556 | 1.12726  |
| C | -0.23584 | -0.76346 | 1.22258  |
| C | 3.35595  | -1.30624 | -0.20206 |
| C | -2.45802 | -0.56016 | -0.01618 |
| C | -3.41578 | -1.39165 | -0.43293 |
| C | -2.77449 | 0.80391  | 0.53967  |
| O | 2.10483  | 2.15273  | 0.41460  |
| O | -0.39628 | 3.25291  | -0.27911 |
| H | 1.11760  | -2.46087 | 1.19947  |
| H | 1.77960  | -0.22439 | -2.09603 |
| H | -0.66042 | -0.54015 | -2.19219 |
| H | -0.46044 | 0.85837  | -1.16417 |
| H | -0.96673 | -2.03296 | -0.33589 |
| H | -0.78401 | -1.21980 | 2.05173  |
| H | -0.15761 | 0.30661  | 1.44028  |
| H | -4.46383 | -1.11321 | -0.40236 |
| H | -3.18109 | -2.37773 | -0.82059 |
| H | -2.17395 | 1.58705  | 0.06908  |
| H | -3.83163 | 1.04229  | 0.40914  |
| H | -2.55131 | 0.84410  | 1.61170  |
| H | 3.79675  | -1.03142 | -1.16276 |
| H | 3.53334  | -2.37548 | -0.04020 |
| H | 3.89365  | -0.77758 | 0.59333  |
| H | 1.77680  | -1.04220 | 1.98031  |
| H | 2.91146  | 2.49881  | 0.02036  |
| H | 1.99741  | 1.25830  | 0.04332  |
| H | -0.64149 | 3.99850  | 0.27552  |
| H | 0.49242  | 2.98684  | 0.01852  |

**Table S21.** Cartesian coordinates of **isomer 2 / EQA-4-II** from B3LYP-D3BJ/6-311++G(d,p) calculations.

|   | X        | Y        | Z        |
|---|----------|----------|----------|
| C | -0.56347 | -0.70956 | -1.27506 |
| C | -1.01418 | -0.03146 | 0.02970  |
| C | -0.46498 | -0.82848 | 1.22886  |
| C | 0.98411  | -1.20598 | 1.05509  |
| C | 1.64464  | -1.14825 | -0.11045 |
| C | 0.96346  | -0.70018 | -1.38213 |
| C | -2.51267 | 0.17197  | 0.10948  |
| C | -3.40009 | -1.04073 | -0.01185 |
| C | 3.09635  | -1.52167 | -0.23062 |
| C | -3.02253 | 1.39554  | 0.26609  |
| O | 2.20077  | 1.72760  | 1.32282  |
| O | 1.04157  | 2.72081  | -1.04155 |
| H | 1.30711  | 0.31028  | -1.63510 |
| H | 1.50610  | -1.57099 | 1.93826  |
| H | -0.59175 | -0.24041 | 2.14537  |
| H | -1.05340 | -1.74169 | 1.38349  |
| H | -0.55267 | 0.96037  | 0.04608  |
| H | -1.00105 | -0.19192 | -2.13253 |
| H | -0.92460 | -1.74409 | -1.29747 |
| H | -4.09314 | 1.56293  | 0.32232  |
| H | -2.38177 | 2.26847  | 0.32835  |
| H | -3.16854 | -1.79081 | 0.75098  |
| H | -4.45188 | -0.76880 | 0.09102  |
| H | -3.26978 | -1.52861 | -0.98311 |
| H | 3.53271  | -1.78313 | 0.73558  |
| H | 3.67479  | -0.69514 | -0.65813 |
| H | 3.21911  | -2.37454 | -0.90726 |
| H | 1.28994  | -1.34831 | -2.20394 |
| H | 1.83242  | 1.96797  | 2.17858  |
| H | 1.95357  | 0.79500  | 1.18706  |
| H | 1.45723  | 3.50776  | -1.40393 |
| H | 1.51309  | 2.53116  | -0.21048 |

**Table S22.** Cartesian coordinates of **isomer 3 / EQC-4-I** from B3LYP-D3BJ/6-311++G(d,p) calculations.

|   | X        | Y        | Z        |
|---|----------|----------|----------|
| C | 2.02380  | -0.81330 | 0.14463  |
| C | 1.31319  | -1.20557 | -1.13000 |
| C | -0.16829 | -1.52592 | -0.91414 |
| C | -0.84294 | -0.43795 | -0.07582 |
| C | -0.16670 | -0.37259 | 1.31072  |
| C | 1.33517  | -0.45248 | 1.23632  |
| C | -2.34747 | -0.56119 | 0.06192  |
| C | -3.03121 | 0.62514  | 0.69399  |
| C | 3.52647  | -0.86200 | 0.11393  |
| C | -3.03723 | -1.62897 | -0.34568 |
| O | 1.78630  | 2.42036  | -0.07867 |
| O | -0.88818 | 3.01845  | -0.76114 |
| H | 1.42349  | -0.39380 | -1.86228 |
| H | 1.88220  | -0.21828 | 2.14841  |
| H | -0.45310 | 0.55117  | 1.82252  |
| H | -0.54348 | -1.19200 | 1.93823  |
| H | -0.66172 | 0.52582  | -0.56877 |
| H | -0.67003 | -1.62618 | -1.87972 |
| H | -0.25636 | -2.49178 | -0.40366 |
| H | -4.11522 | -1.67194 | -0.23280 |
| H | -2.56519 | -2.48889 | -0.80421 |
| H | -2.70899 | 1.55410  | 0.21445  |
| H | -4.11709 | 0.53903  | 0.62358  |
| H | -2.77227 | 0.71092  | 1.75517  |
| H | 3.96484  | -0.52613 | 1.05618  |
| H | 3.91991  | -0.23426 | -0.69359 |
| H | 3.87532  | -1.88183 | -0.08219 |
| H | 1.82622  | -2.06840 | -1.57040 |
| H | 2.22938  | 2.92094  | 0.61329  |
| H | 1.78787  | 1.49514  | 0.22594  |
| H | 0.05781  | 2.90549  | -0.55845 |
| H | -0.91733 | 3.48934  | -1.59846 |

**Table S23.** Cartesian coordinates of **isomer 4 / EQC-1-I** from B3LYP-D3BJ/6-311++G(d,p) calculations.

|   | X        | Y        | Z        |
|---|----------|----------|----------|
| C | 0.17441  | -0.48401 | 1.31642  |
| C | -0.60938 | -1.02817 | 0.11907  |
| C | -0.03905 | -0.45403 | -1.20026 |
| C | 1.46361  | -0.37422 | -1.21170 |
| C | 2.24714  | -0.55451 | -0.14333 |
| C | 1.65959  | -0.83733 | 1.21847  |
| C | -2.11031 | -0.82290 | 0.19504  |
| C | -2.91149 | -1.41032 | -0.93858 |
| C | 3.74691  | -0.49596 | -0.22176 |
| C | -2.71523 | -0.16914 | 1.19503  |
| O | -1.70351 | 2.46160  | -0.39705 |
| O | 1.14812  | 2.72586  | 0.16176  |
| H | 1.81787  | -1.89833 | 1.45777  |
| H | 1.92412  | -0.16123 | -2.17386 |
| H | -0.36399 | -1.07351 | -2.04243 |
| H | -0.46272 | 0.54023  | -1.38783 |
| H | -0.44813 | -2.11604 | 0.08505  |
| H | -0.23654 | -0.88326 | 2.24755  |
| H | 0.07735  | 0.60463  | 1.35832  |
| H | -3.79530 | -0.06797 | 1.21987  |
| H | -2.16857 | 0.24479  | 2.03302  |
| H | -2.65695 | -2.46538 | -1.08470 |
| H | -3.98338 | -1.33666 | -0.74934 |
| H | -2.69660 | -0.89914 | -1.88176 |
| H | 4.09373  | -0.32852 | -1.24328 |
| H | 4.19077  | -1.42976 | 0.14243  |
| H | 4.13851  | 0.30710  | 0.41248  |
| H | 2.21992  | -0.27629 | 1.97432  |
| H | -2.26960 | 3.21058  | -0.18623 |
| H | -2.10561 | 1.69107  | 0.03616  |
| H | 1.52653  | 1.93724  | -0.24535 |
| H | 0.20442  | 2.68428  | -0.06019 |

**Table S24.** Cartesian coordinates of **isomer 5 / EQC-2-I** from B3LYP-D3BJ/6-311++G(d,p) calculations.

|   | X        | Y        | Z        |
|---|----------|----------|----------|
| C | 0.22682  | -0.57047 | -0.06392 |
| C | -0.79313 | -1.66363 | -0.45391 |
| C | -2.20752 | -1.14731 | -0.47185 |
| C | -2.59228 | 0.01854  | 0.05422  |
| C | -1.61399 | 0.92253  | 0.76469  |
| C | -0.31118 | 0.21157  | 1.13734  |
| C | -4.00870 | 0.51424  | -0.03433 |
| C | 1.60981  | -1.16073 | 0.10912  |
| C | 2.24943  | -1.21488 | 1.28495  |
| C | 2.24997  | -1.69895 | -1.14501 |
| O | 3.08280  | 1.71483  | 0.19692  |
| O | 0.74242  | 2.64918  | -1.09097 |
| H | -1.38474 | 1.78405  | 0.12570  |
| H | -2.94599 | -1.77672 | -0.96336 |
| H | -0.54955 | -2.06790 | -1.44172 |
| H | -0.70702 | -2.50716 | 0.24571  |
| H | 0.28149  | 0.13516  | -0.90256 |
| H | 0.42169  | 0.94964  | 1.47352  |
| H | -0.49156 | -0.47492 | 1.97314  |
| H | 3.23250  | -1.66717 | 1.36609  |
| H | 1.80142  | -0.85236 | 2.20202  |
| H | 2.26105  | -0.93502 | -1.92915 |
| H | 3.27420  | -2.02941 | -0.96498 |
| H | 1.68331  | -2.54830 | -1.53807 |
| H | -4.64564 | -0.17373 | -0.59425 |
| H | -4.04585 | 1.49347  | -0.52572 |
| H | -4.43995 | 0.64782  | 0.96460  |
| H | -2.08891 | 1.32802  | 1.66619  |
| H | 3.44717  | 2.15840  | 0.96894  |
| H | 2.86889  | 0.81108  | 0.48822  |
| H | 1.58617  | 2.41359  | -0.66503 |
| H | 0.98412  | 3.13410  | -1.88460 |

**Table S25.** Cartesian coordinates of **isomer 6 / EQa-4-I** from B3LYP-D3BJ/6-311++G(d,p) calculations.

|   | X        | Y        | Z        |
|---|----------|----------|----------|
| C | -0.96074 | -0.28005 | 0.05580  |
| C | -0.45462 | -0.50738 | -1.38279 |
| C | 1.05740  | -0.28330 | -1.47185 |
| C | 1.82393  | -0.93044 | -0.34350 |
| C | 1.20077  | -1.38290 | 0.75389  |
| C | -0.28788 | -1.30124 | 0.97920  |
| C | 3.31313  | -1.03459 | -0.52556 |
| C | -2.47391 | -0.24454 | 0.13238  |
| C | -3.11251 | 0.97059  | -0.49310 |
| C | -3.21489 | -1.19007 | 0.71517  |
| O | 1.91953  | 1.62314  | 1.63090  |
| O | 0.37184  | 2.94594  | -0.32041 |
| H | -4.29631 | -1.11109 | 0.74328  |
| H | -2.78471 | -2.06666 | 1.18280  |
| H | -4.19251 | 0.97739  | -0.33648 |
| H | -2.68713 | 1.88766  | -0.07338 |
| H | -2.92647 | 1.00990  | -1.57083 |
| H | -0.61768 | 0.71934  | 0.34956  |
| H | -0.49564 | -1.05278 | 2.02603  |
| H | -0.71970 | -2.29742 | 0.81981  |
| H | 1.78900  | -1.87469 | 1.52680  |
| H | 3.80217  | -1.46731 | 0.34960  |
| H | 3.75188  | -0.04840 | -0.71391 |
| H | 3.55104  | -1.65613 | -1.39588 |
| H | 1.44049  | -0.66786 | -2.42458 |
| H | 1.26690  | 0.79365  | -1.47502 |
| H | -0.70378 | -1.53267 | -1.68032 |
| H | -0.95882 | 0.16317  | -2.08023 |
| H | 0.94597  | 2.62991  | 0.40047  |
| H | 0.67236  | 3.83675  | -0.51971 |
| H | 1.65263  | 1.60291  | 2.55507  |
| H | 1.83527  | 0.70526  | 1.31505  |

**Table S26.** Cartesian coordinates of **isomer 7 / EQA-2-I** from B3LYP-D3BJ/6-311++G(d,p) calculations.

|   | X        | Y        | Z        |
|---|----------|----------|----------|
| C | -2.19183 | -1.09483 | -0.64682 |
| C | -2.54717 | -0.00158 | 0.03440  |
| C | -1.54118 | 0.80212  | 0.82328  |
| C | -0.22997 | 0.04845  | 1.05475  |
| C | 0.25618  | -0.58861 | -0.25702 |
| C | -0.78395 | -1.62288 | -0.73366 |
| C | -3.95943 | 0.51357  | 0.04753  |
| C | 1.63530  | -1.20587 | -0.16212 |
| C | 2.55630  | -0.98301 | -1.10881 |
| C | 1.92816  | -2.09914 | 1.01527  |
| O | 3.01822  | 1.81493  | 0.29672  |
| O | 0.60212  | 2.96464  | -0.61048 |
| H | -1.32934 | 1.74062  | 0.29782  |
| H | -2.95153 | -1.64845 | -1.19408 |
| H | -0.55752 | -1.90840 | -1.76669 |
| H | -0.69836 | -2.54630 | -0.14479 |
| H | 0.29457  | 0.20785  | -1.00679 |
| H | 0.52557  | 0.73465  | 1.44790  |
| H | -0.38522 | -0.73414 | 1.80610  |
| H | 3.53338  | -1.45424 | -1.07695 |
| H | 2.34187  | -0.35034 | -1.96431 |
| H | 1.18717  | -2.90015 | 1.09651  |
| H | 2.91626  | -2.55475 | 0.93314  |
| H | 1.88310  | -1.53917 | 1.95454  |
| H | -4.61889 | -0.09421 | -0.57559 |
| H | -3.99737 | 1.54636  | -0.31783 |
| H | -4.36302 | 0.52647  | 1.06668  |
| H | -1.98259 | 1.08468  | 1.78678  |
| H | 3.32353  | 1.81018  | 1.20886  |
| H | 2.91602  | 0.88130  | 0.04260  |
| H | 1.46426  | 2.66885  | -0.26817 |
| H | 0.80102  | 3.68339  | -1.21645 |



**Table S27.** Measured frequencies and residuals (in MHz) of the rotational transitions of the parent species of **isomer 1 / EQA-3-II.**

|   |   |   | $J'$ | $K'_{-1}$ | $K'_{+1}$ | $J''$     | $K''_{-1}$ | $K''_{+1}$ | $V_{\text{obs}}$ | $V_{\text{obs}}-V_{\text{calc}}$ |
|---|---|---|------|-----------|-----------|-----------|------------|------------|------------------|----------------------------------|
| 2 | 1 | 1 | 1    | 1         | 0         | 2225.8395 |            |            | -0.0008          |                                  |
| 3 | 1 | 3 | 2    | 1         | 2         | 2815.6395 |            |            | -0.0001          |                                  |
| 3 | 0 | 3 | 2    | 0         | 2         | 2924.2405 |            |            | -0.0006          |                                  |
| 3 | 2 | 2 | 2    | 2         | 1         | 3090.1294 |            |            | -0.0018          |                                  |
| 3 | 2 | 1 | 2    | 2         | 0         | 3256.0312 |            |            | -0.0006          |                                  |
| 3 | 1 | 2 | 2    | 1         | 1         | 3304.3425 |            |            | 0.0006           |                                  |
| 4 | 0 | 4 | 3    | 0         | 3         | 3783.4761 |            |            | -0.0005          |                                  |
| 4 | 2 | 3 | 3    | 2         | 2         | 4083.3389 |            |            | 0.0012           |                                  |
| 4 | 3 | 2 | 3    | 3         | 1         | 4192.9554 |            |            | 0.0009           |                                  |
| 4 | 3 | 1 | 3    | 3         | 0         | 4241.1819 |            |            | -0.0070          |                                  |
| 4 | 1 | 3 | 3    | 1         | 2         | 4330.6149 |            |            | 0.0007           |                                  |
| 4 | 2 | 2 | 3    | 2         | 1         | 4418.7507 |            |            | -0.0002          |                                  |
| 5 | 1 | 5 | 4    | 1         | 4         | 4599.5010 |            |            | 0.0015           |                                  |
| 5 | 0 | 5 | 4    | 0         | 4         | 4631.9765 |            |            | -0.0010          |                                  |
| 5 | 2 | 4 | 4    | 2         | 3         | 5047.7071 |            |            | 0.0024           |                                  |
| 5 | 3 | 3 | 4    | 3         | 2         | 5241.4692 |            |            | 0.0003           |                                  |
| 5 | 4 | 2 | 4    | 4         | 1         | 5252.6209 |            |            | 0.0001           |                                  |
| 5 | 1 | 4 | 4    | 1         | 3         | 5279.8477 |            |            | -0.0013          |                                  |
| 5 | 3 | 2 | 4    | 3         | 1         | 5389.6398 |            |            | 0.0063           |                                  |
| 6 | 1 | 6 | 5    | 1         | 5         | 5472.7525 |            |            | 0.0003           |                                  |
| 6 | 0 | 6 | 5    | 0         | 5         | 5486.1607 |            |            | -0.0006          |                                  |
| 5 | 2 | 3 | 4    | 2         | 2         | 5555.9945 |            |            | 0.0010           |                                  |
| 6 | 2 | 5 | 5    | 2         | 4         | 5981.7957 |            |            | 0.0013           |                                  |
| 6 | 1 | 5 | 5    | 1         | 4         | 6152.8771 |            |            | -0.0020          |                                  |
| 6 | 3 | 4 | 5    | 3         | 3         | 6270.7061 |            |            | 0.0013           |                                  |
| 6 | 4 | 3 | 5    | 4         | 2         | 6325.6023 |            |            | 0.0022           |                                  |
| 7 | 1 | 7 | 6    | 1         | 6         | 6340.6926 |            |            | 0.0009           |                                  |
| 7 | 0 | 7 | 6    | 0         | 6         | 6345.7582 |            |            | -0.0014          |                                  |
| 6 | 4 | 2 | 5    | 4         | 1         | 6367.2918 |            |            | -0.0016          |                                  |
| 6 | 3 | 3 | 5    | 3         | 2         | 6583.2769 |            |            | -0.0008          |                                  |
| 6 | 2 | 4 | 5    | 2         | 3         | 6634.1425 |            |            | 0.0018           |                                  |
| 7 | 2 | 6 | 6    | 2         | 5         | 6889.0557 |            |            | 0.0063           |                                  |
| 7 | 1 | 6 | 6    | 1         | 5         | 6988.6949 |            |            | -0.0041          |                                  |
| 8 | 1 | 8 | 7    | 1         | 7         | 7206.2905 |            |            | 0.0008           |                                  |
| 8 | 0 | 8 | 7    | 0         | 7         | 7208.0950 |            |            | -0.0057          |                                  |
| 7 | 3 | 5 | 6    | 3         | 4         | 7271.1175 |            |            | -0.0002          |                                  |
| 7 | 4 | 4 | 6    | 4         | 3         | 7396.4819 |            |            | -0.0023          |                                  |
| 7 | 4 | 3 | 6    | 4         | 2         | 7518.7954 |            |            | -0.0027          |                                  |
| 7 | 2 | 5 | 6    | 2         | 4         | 7630.9362 |            |            | -0.0029          |                                  |
| 8 | 2 | 7 | 7    | 2         | 6         | 7776.4352 |            |            | 0.0055           |                                  |
| 8 | 1 | 7 | 7    | 1         | 6         | 7825.0100 |            |            | 0.0014           |                                  |

**Table S28.** Measured frequencies and residuals (in MHz) of the rotational transitions of the (H<sub>2</sub><sup>18</sup>O)(H<sub>2</sub><sup>16</sup>O) isotopologue of isomer 1/ EQA-3-II.

|   |   |   | $J'$ | $K'_{-1}$ | $K'_{+1}$ | $J''$     | $K''_{-1}$ | $K''_{+1}$ | $\nu_{\text{obs}}$ | $\nu_{\text{obs}}-\nu_{\text{calc}}$ |
|---|---|---|------|-----------|-----------|-----------|------------|------------|--------------------|--------------------------------------|
| 3 | 1 | 3 | 2    | 1         | 2         | 2770.9011 |            |            | -0.0026            |                                      |
| 3 | 0 | 3 | 2    | 0         | 2         | 2877.9819 |            |            | -0.0035            |                                      |
| 3 | 2 | 2 | 2    | 2         | 1         | 3043.5840 |            |            | 0.0057             |                                      |
| 3 | 2 | 1 | 2    | 2         | 0         | 3209.1768 |            |            | 0.0000             |                                      |
| 3 | 1 | 2 | 2    | 1         | 1         | 3255.9846 |            |            | 0.0224             |                                      |
| 4 | 1 | 4 | 3    | 1         | 3         | 3656.3610 |            |            | 0.0169             |                                      |
| 4 | 0 | 4 | 3    | 0         | 3         | 3722.6041 |            |            | -0.0030            |                                      |
| 4 | 2 | 3 | 3    | 2         | 2         | 4021.2693 |            |            | -0.0033            |                                      |
| 4 | 3 | 2 | 3    | 3         | 1         | 4130.7407 |            |            | -0.0037            |                                      |
| 4 | 3 | 1 | 3    | 3         | 0         | 4179.2646 |            |            | -0.0042            |                                      |
| 4 | 1 | 3 | 3    | 1         | 2         | 4265.9986 |            |            | -0.0015            |                                      |
| 4 | 2 | 2 | 3    | 2         | 1         | 4355.4537 |            |            | -0.0033            |                                      |
| 5 | 1 | 5 | 4    | 1         | 4         | 4525.2840 |            |            | -0.0027            |                                      |
| 5 | 0 | 5 | 4    | 0         | 4         | 4556.9383 |            |            | -0.0006            |                                      |
| 5 | 2 | 4 | 4    | 2         | 3         | 4970.1683 |            |            | -0.0014            |                                      |
| 5 | 3 | 3 | 4    | 3         | 2         | 5163.4848 |            |            | -0.0004            |                                      |
| 5 | 1 | 4 | 4    | 1         | 3         | 5199.0531 |            |            | -0.0025            |                                      |
| 5 | 3 | 2 | 4    | 3         | 1         | 5312.2457 |            |            | -0.0008            |                                      |
| 6 | 1 | 6 | 5    | 1         | 5         | 5384.0049 |            |            | -0.0017            |                                      |
| 6 | 0 | 6 | 5    | 0         | 5         | 5396.9981 |            |            | -0.0037            |                                      |
| 5 | 2 | 3 | 4    | 2         | 2         | 5475.7540 |            |            | -0.0025            |                                      |
| 6 | 2 | 5 | 5    | 2         | 4         | 5888.9044 |            |            | -0.0009            |                                      |
| 6 | 1 | 5 | 5    | 1         | 4         | 6056.5984 |            |            | -0.0024            |                                      |
| 6 | 3 | 4 | 5    | 3         | 3         | 6176.8168 |            |            | -0.0011            |                                      |
| 7 | 1 | 7 | 6    | 1         | 6         | 6237.5150 |            |            | 0.0012             |                                      |
| 7 | 0 | 7 | 6    | 0         | 6         | 6242.3963 |            |            | -0.0028            |                                      |
| 6 | 3 | 3 | 5    | 3         | 2         | 6489.7070 |            |            | 0.0006             |                                      |
| 6 | 2 | 4 | 5    | 2         | 3         | 6536.7532 |            |            | -0.0028            |                                      |
| 7 | 2 | 6 | 6    | 2         | 5         | 6781.0129 |            |            | 0.0023             |                                      |
| 7 | 1 | 6 | 6    | 1         | 5         | 6878.0257 |            |            | -0.0022            |                                      |
| 8 | 1 | 8 | 7    | 1         | 7         | 7088.7417 |            |            | 0.0046             |                                      |
| 8 | 0 | 8 | 7    | 0         | 7         | 7090.4747 |            |            | 0.0009             |                                      |
| 7 | 3 | 5 | 6    | 3         | 4         | 7161.2728 |            |            | 0.0042             |                                      |
| 7 | 2 | 5 | 6    | 2         | 4         | 7516.3269 |            |            | -0.0011            |                                      |
| 7 | 3 | 4 | 6    | 3         | 3         | 7663.3319 |            |            | 0.0008             |                                      |
| 8 | 1 | 7 | 7    | 1         | 6         | 7700.4919 |            |            | 0.0060             |                                      |
| 9 | 1 | 9 | 8    | 1         | 8         | 7939.0769 |            |            | 0.0074             |                                      |
| 9 | 0 | 9 | 8    | 0         | 8         | 7939.6519 |            |            | -0.0117            |                                      |

**Table S29.** Measured frequencies and residuals (in MHz) of the rotational transitions of the (H<sub>2</sub><sup>16</sup>O) (H<sub>2</sub><sup>18</sup>O) isotopologue of isomer 1 / EQA-3-II.

|   |   |   | $J'$ | $K'_{-1}$ | $K'_{+1}$ | $J''$     | $K''_{-1}$ | $K''_{+1}$ | $\nu_{\text{obs}}$ | $\nu_{\text{obs}}-\nu_{\text{calc}}$ |
|---|---|---|------|-----------|-----------|-----------|------------|------------|--------------------|--------------------------------------|
| 3 | 1 | 3 | 2    | 1         | 2         | 2776.1333 |            |            | -0.0024            |                                      |
| 3 | 0 | 3 | 2    | 0         | 2         | 2876.0654 |            |            | 0.0019             |                                      |
| 3 | 2 | 2 | 2    | 2         | 1         | 3066.5797 |            |            | -0.0024            |                                      |
| 3 | 2 | 1 | 2    | 2         | 0         | 3257.1088 |            |            | -0.0014            |                                      |
| 3 | 1 | 2 | 2    | 1         | 1         | 3285.2796 |            |            | 0.0004             |                                      |
| 4 | 1 | 4 | 3    | 1         | 3         | 3658.2739 |            |            | 0.0020             |                                      |
| 4 | 0 | 4 | 3    | 0         | 3         | 3714.2245 |            |            | -0.0032            |                                      |
| 4 | 2 | 3 | 3    | 2         | 2         | 4045.1542 |            |            | -0.0015            |                                      |
| 4 | 3 | 2 | 3    | 3         | 1         | 4172.1989 |            |            | -0.0002            |                                      |
| 4 | 3 | 1 | 3    | 3         | 0         | 4235.7816 |            |            | 0.0023             |                                      |
| 4 | 1 | 3 | 3    | 1         | 2         | 4288.7986 |            |            | 0.0008             |                                      |
| 4 | 2 | 2 | 3    | 2         | 1         | 4417.7397 |            |            | 0.0016             |                                      |
| 5 | 1 | 5 | 4    | 1         | 4         | 4523.4643 |            |            | 0.0000             |                                      |
| 5 | 0 | 5 | 4    | 0         | 4         | 4547.6089 |            |            | 0.0015             |                                      |
| 5 | 2 | 4 | 4    | 2         | 3         | 4990.4369 |            |            | 0.0035             |                                      |
| 5 | 1 | 4 | 4    | 1         | 3         | 5202.8647 |            |            | 0.0002             |                                      |
| 5 | 3 | 3 | 4    | 3         | 2         | 5211.0280 |            |            | -0.0043            |                                      |
| 6 | 1 | 6 | 5    | 1         | 5         | 5379.0674 |            |            | -0.0002            |                                      |
| 6 | 0 | 6 | 5    | 0         | 5         | 5388.0707 |            |            | -0.0008            |                                      |
| 5 | 3 | 2 | 4    | 3         | 1         | 5398.9455 |            |            | -0.0006            |                                      |
| 5 | 2 | 3 | 4    | 2         | 2         | 5538.7716 |            |            | 0.0004             |                                      |
| 6 | 2 | 5 | 5    | 2         | 4         | 5902.3233 |            |            | 0.0022             |                                      |
| 6 | 1 | 5 | 5    | 1         | 4         | 6042.3881 |            |            | -0.0004            |                                      |
| 6 | 3 | 4 | 5    | 3         | 3         | 6224.4732 |            |            | 0.0004             |                                      |
| 7 | 1 | 7 | 6    | 1         | 6         | 6230.2525 |            |            | 0.0002             |                                      |
| 7 | 0 | 7 | 6    | 0         | 6         | 6233.3379 |            |            | -0.0012            |                                      |
| 6 | 2 | 4 | 5    | 2         | 3         | 6585.8034 |            |            | -0.0013            |                                      |
| 6 | 3 | 3 | 5    | 3         | 2         | 6599.3333 |            |            | 0.0015             |                                      |
| 7 | 2 | 6 | 6    | 2         | 5         | 6786.7020 |            |            | 0.0025             |                                      |
| 7 | 1 | 6 | 6    | 1         | 5         | 6858.8025 |            |            | 0.0008             |                                      |
| 8 | 1 | 8 | 7    | 1         | 7         | 7079.6991 |            |            | 0.0032             |                                      |
| 8 | 0 | 8 | 7    | 0         | 7         | 7080.6948 |            |            | -0.0039            |                                      |
| 7 | 3 | 5 | 6    | 3         | 4         | 7202.7999 |            |            | -0.0003            |                                      |
| 7 | 2 | 5 | 6    | 2         | 4         | 7535.4108 |            |            | -0.0012            |                                      |
| 7 | 3 | 4 | 6    | 3         | 3         | 7773.6385 |            |            | -0.0007            |                                      |

**Table S30.** Measured frequencies and residuals (in MHz) of the rotational transitions of the (H<sub>2</sub><sup>18</sup>O) (H<sub>2</sub><sup>18</sup>O) isotopologue of isomer 1 / EQA-3-II.

|   |   |   | $J'$ | $K'_{-1}$ | $K'_{+1}$ | $J''$     | $K''_{-1}$ | $K''_{+1}$ | $V_{\text{obs}}$ | $V_{\text{obs}}-V_{\text{calc}}$ |
|---|---|---|------|-----------|-----------|-----------|------------|------------|------------------|----------------------------------|
| 3 | 1 | 3 | 2    | 1         | 2         | 2733.1916 |            | 0.0005     |                  |                                  |
| 3 | 0 | 3 | 2    | 0         | 2         | 2831.8659 |            | 0.0078     |                  |                                  |
| 3 | 2 | 2 | 2    | 2         | 1         | 3021.1502 |            | -0.0004    |                  |                                  |
| 3 | 2 | 1 | 2    | 2         | 0         | 3210.4457 |            | -0.0033    |                  |                                  |
| 3 | 1 | 2 | 2    | 1         | 1         | 3237.7466 |            | 0.0039     |                  |                                  |
| 4 | 1 | 4 | 3    | 1         | 3         | 3601.3096 |            | -0.0009    |                  |                                  |
| 4 | 2 | 3 | 3    | 2         | 2         | 3984.8223 |            | 0.0010     |                  |                                  |
| 4 | 3 | 2 | 3    | 3         | 1         | 4111.0861 |            | -0.0014    |                  |                                  |
| 4 | 3 | 1 | 3    | 3         | 0         | 4174.4930 |            | -0.0010    |                  |                                  |
| 4 | 1 | 3 | 3    | 1         | 2         | 4225.8581 |            | 0.0039     |                  |                                  |
| 4 | 2 | 2 | 3    | 2         | 1         | 4354.6560 |            | 0.0027     |                  |                                  |
| 5 | 1 | 5 | 4    | 1         | 4         | 4452.6499 |            | -0.0033    |                  |                                  |
| 5 | 0 | 5 | 4    | 0         | 4         | 4476.3478 |            | -0.0003    |                  |                                  |
| 5 | 2 | 4 | 4    | 2         | 3         | 4915.4066 |            | 0.0005     |                  |                                  |
| 5 | 1 | 4 | 4    | 1         | 3         | 5125.0937 |            | 0.0026     |                  |                                  |
| 5 | 3 | 3 | 4    | 3         | 2         | 5134.5379 |            | -0.0014    |                  |                                  |
| 5 | 4 | 2 | 4    | 4         | 1         | 5154.9817 |            | -0.0144    |                  |                                  |
| 5 | 4 | 1 | 4    | 4         | 0         | 5170.0237 |            | 0.0029     |                  |                                  |
| 6 | 1 | 6 | 5    | 1         | 5         | 5294.5269 |            | 0.0000     |                  |                                  |
| 6 | 0 | 6 | 5    | 0         | 5         | 5303.3358 |            | -0.0028    |                  |                                  |
| 5 | 3 | 2 | 4    | 3         | 1         | 5321.7157 |            | -0.0030    |                  |                                  |
| 5 | 2 | 3 | 4    | 2         | 2         | 5459.2595 |            | 0.0003     |                  |                                  |
| 6 | 2 | 5 | 5    | 2         | 4         | 5812.8594 |            | 0.0014     |                  |                                  |
| 6 | 1 | 5 | 5    | 1         | 4         | 5950.6690 |            | 0.0023     |                  |                                  |
| 7 | 1 | 7 | 6    | 1         | 6         | 6132.0496 |            | -0.0003    |                  |                                  |
| 6 | 3 | 4 | 5    | 3         | 3         | 6132.6743 |            | -0.0005    |                  |                                  |
| 7 | 0 | 7 | 6    | 0         | 6         | 6135.0609 |            | -0.0017    |                  |                                  |
| 6 | 4 | 3 | 5    | 4         | 2         | 6208.9166 |            | -0.0025    |                  |                                  |
| 6 | 4 | 2 | 5    | 4         | 1         | 6270.4702 |            | 0.0154     |                  |                                  |
| 6 | 2 | 4 | 5    | 2         | 3         | 6490.1770 |            | -0.0042    |                  |                                  |
| 6 | 3 | 3 | 5    | 3         | 2         | 6505.4673 |            | 0.0008     |                  |                                  |
| 7 | 2 | 6 | 6    | 2         | 5         | 6683.0753 |            | 0.0035     |                  |                                  |
| 7 | 1 | 6 | 6    | 1         | 5         | 6753.7670 |            | 0.0004     |                  |                                  |
| 8 | 1 | 8 | 7    | 1         | 7         | 6967.8720 |            | 0.0090     |                  |                                  |
| 8 | 0 | 8 | 7    | 0         | 7         | 6968.8276 |            | -0.0115    |                  |                                  |
| 7 | 3 | 5 | 6    | 3         | 4         | 7095.8743 |            | -0.0019    |                  |                                  |
| 7 | 2 | 5 | 6    | 2         | 4         | 7424.2212 |            | -0.0066    |                  |                                  |
| 7 | 4 | 3 | 6    | 4         | 2         | 7428.3894 |            | 0.0011     |                  |                                  |
| 8 | 1 | 7 | 7    | 1         | 6         | 7565.6426 |            | 0.0063     |                  |                                  |
| 7 | 3 | 4 | 6    | 3         | 3         | 7662.7087 |            | -0.0021    |                  |                                  |

**Table S31.** Measured frequencies and residuals (in MHz) of the rotational transitions of the parent species of **isomer 2 / EQA-4-II.**

|   |   |   | $J'$ | $K'_{-1}$ | $K'_{+1}$ | $J''$     | $K''_{-1}$ | $K''_{+1}$ | $V_{\text{obs}}$ | $V_{\text{obs}}-V_{\text{calc}}$ |
|---|---|---|------|-----------|-----------|-----------|------------|------------|------------------|----------------------------------|
| 2 | 1 | 1 | 1    | 0         | 1         | 2703.0340 |            | -0.0032    |                  |                                  |
| 3 | 0 | 3 | 2    | 1         | 2         | 2740.1899 |            | 0.0000     |                  |                                  |
| 3 | 1 | 3 | 2    | 1         | 2         | 2931.4708 |            | 0.0023     |                  |                                  |
| 3 | 0 | 3 | 2    | 0         | 2         | 3034.4714 |            | -0.0005    |                  |                                  |
| 3 | 2 | 2 | 2    | 2         | 1         | 3120.1613 |            | 0.0011     |                  |                                  |
| 3 | 2 | 1 | 2    | 2         | 0         | 3205.8666 |            | -0.0047    |                  |                                  |
| 3 | 1 | 3 | 2    | 0         | 2         | 3225.7533 |            | 0.0028     |                  |                                  |
| 3 | 1 | 2 | 2    | 1         | 1         | 3279.9859 |            | 0.0017     |                  |                                  |
| 2 | 2 | 1 | 1    | 1         | 0         | 3363.2767 |            | -0.0121    |                  |                                  |
| 2 | 2 | 0 | 1    | 1         | 0         | 3385.9992 |            | 0.0002     |                  |                                  |
| 2 | 2 | 0 | 1    | 1         | 1         | 3503.1115 |            | -0.0005    |                  |                                  |
| 4 | 0 | 4 | 3    | 1         | 3         | 3779.7695 |            | 0.0077     |                  |                                  |
| 4 | 1 | 4 | 3    | 1         | 3         | 3887.8062 |            | 0.0014     |                  |                                  |
| 3 | 1 | 2 | 2    | 0         | 2         | 3925.6012 |            | -0.0020    |                  |                                  |
| 4 | 0 | 4 | 3    | 0         | 3         | 3971.0415 |            | 0.0011     |                  |                                  |
| 4 | 2 | 3 | 3    | 2         | 2         | 4142.3709 |            | -0.0042    |                  |                                  |
| 4 | 3 | 2 | 3    | 3         | 1         | 4198.3602 |            | 0.0057     |                  |                                  |
| 4 | 3 | 1 | 3    | 3         | 0         | 4214.7937 |            | -0.0157    |                  |                                  |
| 3 | 2 | 2 | 2    | 1         | 1         | 4286.2096 |            | -0.0027    |                  |                                  |
| 4 | 2 | 2 | 3    | 2         | 1         | 4331.2706 |            | -0.0012    |                  |                                  |
| 4 | 1 | 3 | 3    | 1         | 2         | 4339.7843 |            | 0.0022     |                  |                                  |
| 3 | 2 | 1 | 2    | 1         | 1         | 4394.6349 |            | 0.0013     |                  |                                  |
| 3 | 2 | 2 | 2    | 1         | 2         | 4637.5496 |            | 0.0003     |                  |                                  |
| 3 | 2 | 1 | 2    | 1         | 2         | 4745.9682 |            | -0.0024    |                  |                                  |
| 5 | 0 | 5 | 4    | 1         | 4         | 4777.9024 |            | 0.0036     |                  |                                  |
| 5 | 0 | 5 | 4    | 0         | 4         | 4885.9434 |            | 0.0017     |                  |                                  |
| 5 | 1 | 5 | 4    | 0         | 4         | 4940.7228 |            | -0.0008    |                  |                                  |
| 4 | 2 | 3 | 3    | 1         | 2         | 5148.6118 |            | 0.0087     |                  |                                  |
| 5 | 2 | 4 | 4    | 2         | 3         | 5149.9379 |            | 0.0018     |                  |                                  |
| 4 | 1 | 3 | 3    | 0         | 3         | 5230.9089 |            | -0.0046    |                  |                                  |
| 5 | 3 | 3 | 4    | 3         | 2         | 5253.3456 |            | 0.0052     |                  |                                  |
| 5 | 3 | 2 | 4    | 3         | 1         | 5307.6981 |            | 0.0019     |                  |                                  |
| 5 | 1 | 4 | 4    | 1         | 3         | 5363.8261 |            | 0.0025     |                  |                                  |
| 4 | 2 | 2 | 3    | 1         | 2         | 5445.9164 |            | -0.0047    |                  |                                  |
| 5 | 2 | 3 | 4    | 2         | 2         | 5461.9769 |            | -0.0007    |                  |                                  |
| 6 | 0 | 6 | 5    | 1         | 5         | 5742.7638 |            | 0.0001     |                  |                                  |
| 6 | 1 | 6 | 5    | 1         | 5         | 5768.5563 |            | 0.0013     |                  |                                  |
| 6 | 0 | 6 | 5    | 0         | 5         | 5797.5447 |            | -0.0009    |                  |                                  |
| 6 | 1 | 6 | 5    | 0         | 5         | 5823.3377 |            | 0.0008     |                  |                                  |
| 4 | 2 | 3 | 3    | 1         | 3         | 5848.4524 |            | -0.0035    |                  |                                  |
| 5 | 2 | 4 | 4    | 1         | 3         | 5958.7458 |            | -0.0114    |                  |                                  |
| 6 | 2 | 5 | 5    | 2         | 4         | 6140.6611 |            | 0.0034     |                  |                                  |
| 6 | 3 | 4 | 5    | 3         | 3         | 6302.9278 |            | -0.0004    |                  |                                  |
| 6 | 1 | 5 | 5    | 1         | 4         | 6341.1212 |            | 0.0030     |                  |                                  |
| 6 | 3 | 3 | 5    | 3         | 2         | 6432.7072 |            | -0.0031    |                  |                                  |
| 4 | 3 | 2 | 3    | 2         | 2         | 6447.5784 |            | 0.0081     |                  |                                  |
| 5 | 2 | 3 | 4    | 1         | 3         | 6568.1108 |            | -0.0059    |                  |                                  |
| 6 | 2 | 4 | 5    | 2         | 3         | 6573.4634 |            | -0.0034    |                  |                                  |
| 5 | 1 | 4 | 4    | 0         | 4         | 6623.7016 |            | 0.0049     |                  |                                  |
| 7 | 0 | 7 | 6    | 1         | 6         | 6686.8444 |            | 0.0006     |                  |                                  |
| 7 | 1 | 7 | 6    | 1         | 6         | 6698.3926 |            | 0.0014     |                  |                                  |
| 7 | 0 | 7 | 6    | 0         | 6         | 6712.6375 |            | 0.0024     |                  |                                  |
| 7 | 1 | 7 | 6    | 0         | 6         | 6724.1765 |            | -0.0061    |                  |                                  |
| 6 | 2 | 5 | 5    | 1         | 4         | 6735.5845 |            | -0.0068    |                  |                                  |

|   |   |   |   |   |   |           |         |
|---|---|---|---|---|---|-----------|---------|
| 7 | 2 | 6 | 6 | 2 | 5 | 7114.0155 | -0.0012 |
| 7 | 1 | 6 | 6 | 1 | 5 | 7273.2443 | 0.0006  |
| 5 | 3 | 2 | 4 | 2 | 2 | 7334.8492 | 0.0056  |
| 7 | 3 | 5 | 6 | 3 | 4 | 7341.4765 | -0.0026 |
| 5 | 3 | 3 | 4 | 2 | 3 | 7558.5397 | 0.0040  |
| 7 | 3 | 4 | 6 | 3 | 3 | 7584.8817 | -0.0065 |
| 8 | 1 | 8 | 7 | 1 | 7 | 7624.6677 | -0.0091 |
| 8 | 0 | 8 | 7 | 0 | 7 | 7631.2364 | 0.0019  |
| 8 | 1 | 8 | 7 | 0 | 7 | 7636.2326 | 0.0084  |
| 7 | 2 | 5 | 6 | 2 | 4 | 7650.2993 | 0.0033  |
| 6 | 2 | 4 | 5 | 1 | 4 | 7777.7692 | 0.0094  |

---

The  $5_{1,5} \leftarrow 4_{1,4}$  transition appeared as a shoulder of a water heptamer transition and could not be measured adequately.

**Table S32.** Measured frequencies and residuals (in MHz) of the rotational transitions of the (H<sub>2</sub><sup>18</sup>O)(H<sub>2</sub><sup>16</sup>O) isotopologue of isomer 2 / EQA-4-II.

|   |   |   | $J'$ | $K'_{-1}$ | $K'_{+1}$ | $J''$     | $K''_{-1}$ | $K''_{+1}$ | $\nu_{\text{obs}}$ | $\nu_{\text{obs}}-\nu_{\text{calc}}$ |
|---|---|---|------|-----------|-----------|-----------|------------|------------|--------------------|--------------------------------------|
| 2 | 1 | 1 | 1    | 0         | 1         | 2661.5586 |            |            | -0.0094            |                                      |
| 3 | 1 | 3 | 2    | 1         | 2         | 2889.1735 |            |            | -0.0003            |                                      |
| 3 | 0 | 3 | 2    | 0         | 2         | 2990.3403 |            |            | 0.0002             |                                      |
| 3 | 1 | 2 | 2    | 1         | 1         | 3232.3296 |            |            | 0.0003             |                                      |
| 2 | 2 | 0 | 1    | 1         | 0         | 3330.4967 |            |            | 0.0121             |                                      |
| 4 | 0 | 4 | 3    | 1         | 3         | 3726.3591 |            |            | -0.0015            |                                      |
| 4 | 1 | 4 | 3    | 1         | 3         | 3831.6673 |            |            | 0.0014             |                                      |
| 4 | 0 | 4 | 3    | 0         | 3         | 3913.2201 |            |            | -0.0018            |                                      |
| 4 | 2 | 3 | 3    | 2         | 2         | 4082.3952 |            |            | -0.0016            |                                      |
| 4 | 2 | 2 | 3    | 2         | 1         | 4268.9323 |            |            | 0.0022             |                                      |
| 4 | 1 | 3 | 3    | 1         | 2         | 4276.5948 |            |            | 0.0051             |                                      |
| 3 | 2 | 1 | 2    | 1         | 1         | 4324.8633 |            |            | -0.0018            |                                      |
| 3 | 2 | 2 | 2    | 1         | 2         | 4563.6554 |            |            | -0.0064            |                                      |
| 5 | 1 | 5 | 4    | 1         | 4         | 4762.8611 |            |            | 0.0004             |                                      |
| 5 | 0 | 5 | 4    | 0         | 4         | 4814.9045 |            |            | 0.0030             |                                      |
| 5 | 1 | 5 | 4    | 0         | 4         | 4868.1657 |            |            | -0.0003            |                                      |
| 5 | 2 | 4 | 4    | 2         | 3         | 5075.2833 |            |            | 0.0025             |                                      |
| 5 | 1 | 4 | 4    | 1         | 3         | 5285.4629 |            |            | 0.0013             |                                      |
| 5 | 2 | 3 | 4    | 2         | 2         | 5383.1454 |            |            | 0.0057             |                                      |
| 6 | 0 | 6 | 5    | 1         | 5         | 5660.1882 |            |            | 0.0045             |                                      |
| 6 | 1 | 6 | 5    | 1         | 5         | 5685.2037 |            |            | 0.0033             |                                      |
| 6 | 0 | 6 | 5    | 0         | 5         | 5713.4469 |            |            | -0.0012            |                                      |
| 6 | 1 | 6 | 5    | 0         | 5         | 5738.4530 |            |            | -0.0119            |                                      |
| 4 | 2 | 3 | 3    | 1         | 3         | 5756.8875 |            |            | 0.0028             |                                      |
| 6 | 2 | 5 | 5    | 2         | 4         | 6051.5317 |            |            | 0.0011             |                                      |
| 6 | 1 | 5 | 5    | 1         | 4         | 6248.1328 |            |            | -0.0105            |                                      |
| 5 | 2 | 3 | 4    | 1         | 3         | 6468.0151 |            |            | -0.0007            |                                      |
| 6 | 2 | 4 | 5    | 2         | 3         | 6478.1898 |            |            | -0.0022            |                                      |
| 5 | 1 | 4 | 4    | 0         | 4         | 6524.8011 |            |            | -0.0019            |                                      |
| 7 | 0 | 7 | 6    | 1         | 6         | 6590.4408 |            |            | 0.0006             |                                      |
| 7 | 1 | 7 | 6    | 1         | 6         | 6601.6121 |            |            | -0.0024            |                                      |
| 7 | 1 | 7 | 6    | 0         | 6         | 6626.6352 |            |            | 0.0039             |                                      |
| 7 | 1 | 6 | 6    | 1         | 5         | 7166.3966 |            |            | 0.0043             |                                      |

**Table S33.** Measured frequencies and residuals (in MHz) of the rotational transitions of the (H<sub>2</sub><sup>16</sup>O) (H<sub>2</sub><sup>18</sup>O) isotopologue of isomer 2 / EQA-4-II.

|   |   |   | $J'$ | $K'_{-1}$ | $K'_{+1}$ | $J''$     | $K''_{-1}$ | $K''_{+1}$ | $V_{\text{obs}}$ | $V_{\text{obs}}-V_{\text{calc}}$ |
|---|---|---|------|-----------|-----------|-----------|------------|------------|------------------|----------------------------------|
| 2 | 1 | 1 | 1    | 0         | 1         | 2663.7346 |            |            | -0.0003          |                                  |
| 3 | 0 | 3 | 2    | 1         | 2         | 2731.0696 |            |            | 0.0013           |                                  |
| 3 | 1 | 3 | 2    | 1         | 2         | 2892.1055 |            |            | 0.0055           |                                  |
| 3 | 0 | 3 | 2    | 0         | 2         | 2992.4009 |            |            | -0.0045          |                                  |
| 3 | 1 | 3 | 2    | 0         | 2         | 3153.4392 |            |            | 0.0020           |                                  |
| 3 | 1 | 2 | 2    | 1         | 1         | 3256.4868 |            |            | -0.0016          |                                  |
| 2 | 2 | 0 | 1    | 1         | 0         | 3282.5632 |            |            | -0.0018          |                                  |
| 2 | 2 | 1 | 1    | 1         | 1         | 3378.7226 |            |            | -0.0038          |                                  |
| 4 | 0 | 4 | 3    | 1         | 3         | 3747.1906 |            |            | -0.0071          |                                  |
| 4 | 1 | 4 | 3    | 1         | 3         | 3832.4687 |            |            | 0.0004           |                                  |
| 3 | 1 | 2 | 2    | 0         | 2         | 3885.9133 |            |            | 0.0026           |                                  |
| 4 | 0 | 4 | 3    | 0         | 3         | 3908.2318 |            |            | 0.0024           |                                  |
| 4 | 1 | 4 | 3    | 0         | 3         | 3993.5120 |            |            | 0.0119           |                                  |
| 4 | 2 | 3 | 3    | 2         | 2         | 4100.7629 |            |            | 0.0039           |                                  |
| 3 | 2 | 1 | 2    | 1         | 1         | 4289.1132 |            |            | -0.0045          |                                  |
| 4 | 1 | 3 | 3    | 1         | 2         | 4301.8154 |            |            | 0.0015           |                                  |
| 4 | 2 | 2 | 3    | 2         | 1         | 4313.7667 |            |            | 0.0013           |                                  |
| 3 | 2 | 2 | 2    | 1         | 2         | 4531.8157 |            |            | 0.0018           |                                  |
| 5 | 1 | 5 | 4    | 1         | 4         | 4760.5544 |            |            | -0.0050          |                                  |
| 5 | 0 | 5 | 4    | 0         | 4         | 4805.4135 |            |            | -0.0033          |                                  |
| 5 | 1 | 5 | 4    | 0         | 4         | 4845.8299 |            |            | -0.0002          |                                  |
| 5 | 1 | 4 | 4    | 1         | 3         | 5304.3152 |            |            | -0.0001          |                                  |
| 4 | 2 | 2 | 3    | 1         | 2         | 5346.3984 |            |            | 0.0036           |                                  |
| 5 | 2 | 3 | 4    | 2         | 2         | 5436.6041 |            |            | -0.0069          |                                  |
| 6 | 0 | 6 | 5    | 1         | 5         | 5661.7692 |            |            | -0.0009          |                                  |
| 6 | 1 | 6 | 5    | 1         | 5         | 5679.5638 |            |            | -0.0005          |                                  |
| 6 | 0 | 6 | 5    | 0         | 5         | 5702.1846 |            |            | 0.0014           |                                  |
| 6 | 1 | 6 | 5    | 0         | 5         | 5719.9677 |            |            | -0.0098          |                                  |
| 6 | 2 | 5 | 5    | 2         | 4         | 6066.7359 |            |            | 0.0059           |                                  |
| 6 | 3 | 4 | 5    | 3         | 3         | 6249.5173 |            |            | -0.0021          |                                  |
| 6 | 1 | 5 | 5    | 1         | 4         | 6253.7030 |            |            | 0.0034           |                                  |
| 6 | 3 | 3 | 5    | 3         | 2         | 6411.0296 |            |            | -0.0018          |                                  |
| 5 | 2 | 3 | 4    | 1         | 3         | 6481.1905 |            |            | -0.0015          |                                  |
| 6 | 2 | 4 | 5    | 2         | 3         | 6532.5872 |            |            | -0.0008          |                                  |
| 7 | 0 | 7 | 6    | 1         | 6         | 6585.4432 |            |            | 0.0131           |                                  |
| 5 | 1 | 4 | 4    | 0         | 4         | 6591.4056 |            |            | 0.0007           |                                  |
| 7 | 0 | 7 | 6    | 0         | 6         | 6603.2203 |            |            | -0.0041          |                                  |
| 7 | 1 | 7 | 6    | 0         | 6         | 6610.6807 |            |            | -0.0014          |                                  |
| 7 | 1 | 6 | 6    | 1         | 5         | 7158.3444 |            |            | -0.0042          |                                  |
| 7 | 3 | 4 | 6    | 3         | 3         | 7564.4422 |            |            | 0.0006           |                                  |
| 6 | 2 | 4 | 5    | 1         | 4         | 7709.4680 |            |            | 0.0032           |                                  |



**Table S34.** Measured frequencies and residuals (in MHz) of the rotational transitions of the (H<sub>2</sub><sup>18</sup>O) (H<sub>2</sub><sup>18</sup>O) isotopologue of isomer 2 / EQA-4-II.

|   |   |   | $J'$ | $K'_{-1}$ | $K'_{+1}$ | $J''$     | $K''_{-1}$ | $K''_{+1}$ | $\nu_{\text{obs}}$ | $\nu_{\text{obs}}-\nu_{\text{calc}}$ |
|---|---|---|------|-----------|-----------|-----------|------------|------------|--------------------|--------------------------------------|
| 3 | 1 | 3 | 2    | 1         | 2         | 2851.6427 |            |            | 0.0030             |                                      |
| 3 | 0 | 3 | 2    | 0         | 2         | 2950.1544 |            |            | 0.0004             |                                      |
| 3 | 1 | 2 | 2    | 1         | 1         | 3208.8950 |            |            | 0.0047             |                                      |
| 2 | 2 | 0 | 1    | 1         | 0         | 3232.1474 |            |            | 0.0013             |                                      |
| 4 | 0 | 4 | 3    | 1         | 3         | 3694.8576 |            |            | 0.0021             |                                      |
| 4 | 1 | 4 | 3    | 1         | 3         | 3779.0345 |            |            | 0.0060             |                                      |
| 4 | 0 | 4 | 3    | 0         | 3         | 3853.5641 |            |            | 0.0026             |                                      |
| 4 | 2 | 3 | 3    | 2         | 2         | 4042.0193 |            |            | -0.0012            |                                      |
| 3 | 2 | 1 | 2    | 1         | 1         | 4224.1500 |            |            | -0.0040            |                                      |
| 4 | 1 | 3 | 3    | 1         | 2         | 4239.2630 |            |            | -0.0008            |                                      |
| 4 | 2 | 2 | 3    | 2         | 1         | 4250.4951 |            |            | 0.0010             |                                      |
| 3 | 2 | 2 | 2    | 1         | 2         | 4462.3662 |            |            | 0.0008             |                                      |
| 5 | 0 | 5 | 4    | 1         | 4         | 4654.4274 |            |            | 0.0013             |                                      |
| 5 | 1 | 5 | 4    | 1         | 4         | 4694.3897 |            |            | 0.0045             |                                      |
| 5 | 1 | 5 | 4    | 0         | 4         | 4778.5568 |            |            | -0.0015            |                                      |
| 5 | 2 | 4 | 4    | 2         | 3         | 5020.6093 |            |            | 0.0087             |                                      |
| 3 | 3 | 0 | 2    | 2         | 0         | 5097.7595 |            |            | 0.0067             |                                      |
| 5 | 1 | 4 | 4    | 1         | 3         | 5227.7856 |            |            | 0.0009             |                                      |
| 4 | 2 | 2 | 3    | 1         | 2         | 5265.7607 |            |            | 0.0028             |                                      |
| 5 | 2 | 3 | 4    | 2         | 2         | 5356.7967 |            |            | -0.0033            |                                      |
| 6 | 0 | 6 | 5    | 1         | 5         | 5583.1817 |            |            | -0.0184            |                                      |
| 6 | 1 | 6 | 5    | 1         | 5         | 5600.8172 |            |            | -0.0062            |                                      |
| 6 | 0 | 6 | 5    | 0         | 5         | 5623.1510 |            |            | -0.0082            |                                      |
| 6 | 1 | 6 | 5    | 0         | 5         | 5640.7764 |            |            | -0.0062            |                                      |
| 4 | 2 | 3 | 3    | 1         | 3         | 5652.7406 |            |            | -0.0057            |                                      |
| 6 | 2 | 5 | 5    | 2         | 4         | 5980.4693 |            |            | -0.0032            |                                      |
| 6 | 1 | 5 | 5    | 1         | 4         | 6164.3179 |            |            | -0.0001            |                                      |
| 4 | 3 | 2 | 3    | 2         | 2         | 6178.5155 |            |            | -0.0034            |                                      |
| 5 | 2 | 3 | 4    | 1         | 3         | 6383.2919 |            |            | -0.0021            |                                      |
| 6 | 2 | 4 | 5    | 2         | 3         | 6436.9266 |            |            | 0.0034             |                                      |
| 7 | 0 | 7 | 6    | 1         | 6         | 6494.2816 |            |            | 0.0053             |                                      |
| 7 | 1 | 7 | 6    | 1         | 6         | 6501.6733 |            |            | -0.0012            |                                      |
| 7 | 0 | 7 | 6    | 0         | 6         | 6511.8977 |            |            | -0.0019            |                                      |
| 7 | 1 | 7 | 6    | 0         | 6         | 6519.3152 |            |            | 0.0174             |                                      |
| 5 | 3 | 3 | 4    | 2         | 3         | 7272.6008 |            |            | 0.0005             |                                      |

**Table S35.** Measured frequencies and residuals (in MHz) of the rotational transitions of the parent species of **isomer 3 / EQC-4-I**.

|   |   |   | $J'$ | $K'_{-1}$ | $K'_{+1}$ | $J''$     | $K''_{-1}$ | $K''_{+1}$ | $V_{\text{obs}}$ | $V_{\text{obs}}-V_{\text{calc}}$ |
|---|---|---|------|-----------|-----------|-----------|------------|------------|------------------|----------------------------------|
| 2 | 0 | 2 | 1    | 0         | 1         | 2030.8677 |            |            | -0.0011          |                                  |
| 2 | 1 | 1 | 1    | 1         | 0         | 2248.8860 |            |            | 0.0039           |                                  |
| 3 | 1 | 3 | 2    | 1         | 2         | 2843.2301 |            |            | 0.0003           |                                  |
| 3 | 0 | 3 | 2    | 0         | 2         | 2944.1993 |            |            | -0.0005          |                                  |
| 3 | 2 | 2 | 2    | 2         | 1         | 3122.2836 |            |            | 0.0042           |                                  |
| 3 | 2 | 1 | 2    | 2         | 0         | 3300.3804 |            |            | 0.0006           |                                  |
| 3 | 1 | 2 | 2    | 1         | 1         | 3335.1483 |            |            | -0.0008          |                                  |
| 4 | 1 | 4 | 3    | 1         | 3         | 3750.3127 |            |            | -0.0003          |                                  |
| 4 | 0 | 4 | 3    | 0         | 3         | 3809.0137 |            |            | -0.0004          |                                  |
| 4 | 2 | 3 | 3    | 2         | 2         | 4122.7232 |            |            | -0.0020          |                                  |
| 4 | 3 | 1 | 3    | 3         | 0         | 4297.7147 |            |            | -0.0015          |                                  |
| 4 | 1 | 3 | 3    | 1         | 2         | 4363.0346 |            |            | -0.0014          |                                  |
| 4 | 2 | 2 | 3    | 2         | 1         | 4475.1057 |            |            | 0.0009           |                                  |
| 5 | 1 | 5 | 4    | 1         | 4         | 4640.8586 |            |            | 0.0001           |                                  |
| 5 | 0 | 5 | 4    | 0         | 4         | 4667.1606 |            |            | -0.0012          |                                  |
| 5 | 2 | 4 | 4    | 2         | 3         | 5092.1024 |            |            | -0.0004          |                                  |
| 5 | 3 | 3 | 4    | 3         | 2         | 5298.8775 |            |            | 0.0008           |                                  |
| 5 | 1 | 4 | 4    | 1         | 3         | 5307.4300 |            |            | -0.0005          |                                  |
| 5 | 4 | 2 | 4    | 4         | 1         | 5315.3579 |            |            | 0.0040           |                                  |
| 5 | 4 | 1 | 4    | 4         | 0         | 5328.1143 |            |            | -0.0046          |                                  |
| 5 | 3 | 2 | 4    | 3         | 1         | 5468.8100 |            |            | -0.0015          |                                  |
| 6 | 1 | 6 | 5    | 1         | 5         | 5521.7176 |            |            | 0.0013           |                                  |
| 6 | 0 | 6 | 5    | 0         | 5         | 5531.8816 |            |            | 0.0002           |                                  |
| 5 | 2 | 3 | 4    | 2         | 2         | 5615.9902 |            |            | -0.0004          |                                  |
| 6 | 2 | 5 | 5    | 2         | 4         | 6029.7883 |            |            | -0.0007          |                                  |
| 6 | 1 | 5 | 5    | 1         | 4         | 6177.5775 |            |            | 0.0000           |                                  |
| 6 | 3 | 4 | 5    | 3         | 3         | 6334.0256 |            |            | -0.0003          |                                  |
| 7 | 1 | 7 | 6    | 1         | 6         | 6397.9376 |            |            | 0.0040           |                                  |
| 6 | 4 | 3 | 5    | 4         | 2         | 6401.0229 |            |            | -0.0008          |                                  |
| 7 | 0 | 7 | 6    | 0         | 6         | 6401.5386 |            |            | -0.0010          |                                  |
| 6 | 4 | 2 | 5    | 4         | 1         | 6453.8082 |            |            | -0.0011          |                                  |
| 6 | 3 | 3 | 5    | 3         | 2         | 6679.8814 |            |            | 0.0008           |                                  |
| 6 | 2 | 4 | 5    | 2         | 3         | 6689.6498 |            |            | 0.0005           |                                  |
| 7 | 2 | 6 | 6    | 2         | 5         | 6940.6550 |            |            | -0.0001          |                                  |
| 7 | 1 | 6 | 6    | 1         | 5         | 7020.1008 |            |            | -0.0021          |                                  |
| 8 | 1 | 8 | 7    | 1         | 7         | 7272.2512 |            |            | 0.0070           |                                  |
| 8 | 0 | 8 | 7    | 0         | 7         | 7273.4481 |            |            | -0.0073          |                                  |
| 7 | 3 | 5 | 6    | 3         | 4         | 7336.9540 |            |            | 0.0023           |                                  |
| 7 | 5 | 3 | 6    | 5         | 2         | 7468.1063 |            |            | 0.0023           |                                  |
| 7 | 5 | 2 | 6    | 5         | 1         | 7480.5446 |            |            | -0.0013          |                                  |
| 7 | 4 | 4 | 6    | 4         | 3         | 7481.7872 |            |            | 0.0029           |                                  |
| 7 | 4 | 3 | 6    | 4         | 2         | 7632.4673 |            |            | -0.0024          |                                  |
| 7 | 2 | 5 | 6    | 2         | 4         | 7673.3308 |            |            | 0.0019           |                                  |
| 8 | 2 | 7 | 7    | 2         | 6         | 7832.8585 |            |            | 0.0003           |                                  |
| 8 | 1 | 7 | 7    | 1         | 6         | 7868.7577 |            |            | -0.0028          |                                  |
| 7 | 3 | 4 | 6    | 3         | 3         | 7873.7992 |            |            | -0.0003          |                                  |

**Table S36.** Measured frequencies and residuals (in MHz) of the rotational transitions of the (H<sub>2</sub><sup>18</sup>O)(H<sub>2</sub><sup>16</sup>O) isotopologue of isomer 3 / EQC-4-I.

|   |   |   | $J'$ | $K'_{-1}$ | $K'_{+1}$ | $J''$     | $K''_{-1}$ | $K''_{+1}$ | $\nu_{\text{obs}}$ | $\nu_{\text{obs}}-\nu_{\text{calc}}$ |
|---|---|---|------|-----------|-----------|-----------|------------|------------|--------------------|--------------------------------------|
| 3 | 1 | 3 | 2    | 1         | 2         | 2804.1150 |            |            | 0.0018             |                                      |
| 3 | 0 | 3 | 2    | 0         | 2         | 2901.4570 |            |            | -0.0001            |                                      |
| 3 | 2 | 2 | 2    | 2         | 1         | 3087.4074 |            |            | -0.0107            |                                      |
| 3 | 2 | 1 | 2    | 2         | 0         | 3273.4011 |            |            | 0.0020             |                                      |
| 3 | 1 | 2 | 2    | 1         | 1         | 3300.6819 |            |            | 0.0004             |                                      |
| 4 | 1 | 4 | 3    | 1         | 3         | 3696.6190 |            |            | 0.0049             |                                      |
| 4 | 0 | 4 | 3    | 0         | 3         | 3751.0648 |            |            | -0.0022            |                                      |
| 4 | 2 | 3 | 3    | 2         | 2         | 4073.9769 |            |            | 0.0014             |                                      |
| 4 | 3 | 2 | 3    | 3         | 1         | 4197.9772 |            |            | 0.0046             |                                      |
| 4 | 3 | 1 | 3    | 3         | 0         | 4260.1181 |            |            | 0.0047             |                                      |
| 4 | 2 | 2 | 3    | 2         | 1         | 4437.5626 |            |            | 0.0020             |                                      |
| 5 | 1 | 5 | 4    | 1         | 4         | 4572.5920 |            |            | 0.0008             |                                      |
| 5 | 0 | 5 | 4    | 0         | 4         | 4596.0584 |            |            | -0.0022            |                                      |
| 5 | 2 | 4 | 4    | 2         | 3         | 5028.0360 |            |            | 0.0029             |                                      |
| 5 | 1 | 4 | 4    | 1         | 3         | 5234.9518 |            |            | -0.0018            |                                      |
| 5 | 3 | 3 | 4    | 3         | 2         | 5243.3295 |            |            | -0.0006            |                                      |
| 5 | 4 | 2 | 4    | 4         | 1         | 5263.2209 |            |            | -0.0046            |                                      |
| 5 | 4 | 1 | 4    | 4         | 0         | 5277.9111 |            |            | -0.0028            |                                      |
| 5 | 3 | 2 | 4    | 3         | 1         | 5426.9247 |            |            | -0.0030            |                                      |
| 6 | 1 | 6 | 5    | 1         | 5         | 5439.2224 |            |            | -0.0009            |                                      |
| 6 | 0 | 6 | 5    | 0         | 5         | 5447.9650 |            |            | -0.0014            |                                      |
| 5 | 2 | 3 | 4    | 2         | 2         | 5562.9971 |            |            | 0.0007             |                                      |
| 6 | 2 | 5 | 5    | 2         | 4         | 5949.5106 |            |            | 0.0003             |                                      |
| 6 | 1 | 5 | 5    | 1         | 4         | 6085.7864 |            |            | -0.0010            |                                      |
| 6 | 3 | 4 | 5    | 3         | 3         | 6263.8793 |            |            | -0.0022            |                                      |
| 7 | 1 | 7 | 6    | 1         | 6         | 6301.5535 |            |            | 0.0033             |                                      |
| 7 | 0 | 7 | 6    | 0         | 6         | 6304.5404 |            |            | -0.0040            |                                      |
| 6 | 4 | 3 | 5    | 4         | 2         | 6338.4900 |            |            | 0.0030             |                                      |
| 6 | 4 | 2 | 5    | 4         | 1         | 6398.6891 |            |            | 0.0071             |                                      |
| 6 | 2 | 4 | 5    | 2         | 3         | 6616.1459 |            |            | 0.0004             |                                      |
| 6 | 3 | 3 | 5    | 3         | 2         | 6629.9452 |            |            | -0.0022            |                                      |
| 7 | 2 | 6 | 6    | 2         | 5         | 6844.1630 |            |            | 0.0019             |                                      |
| 7 | 1 | 6 | 6    | 1         | 5         | 6914.2212 |            |            | -0.0003            |                                      |
| 8 | 1 | 8 | 7    | 1         | 7         | 7162.1875 |            |            | 0.0087             |                                      |
| 8 | 0 | 8 | 7    | 0         | 7         | 7163.1432 |            |            | -0.0071            |                                      |
| 7 | 3 | 5 | 6    | 3         | 4         | 7250.1418 |            |            | -0.0034            |                                      |
| 7 | 2 | 5 | 6    | 2         | 4         | 7574.1536 |            |            | 0.0024             |                                      |
| 7 | 4 | 3 | 6    | 4         | 2         | 7575.9317 |            |            | -0.0035            |                                      |
| 8 | 1 | 7 | 7    | 1         | 6         | 7751.1851 |            |            | 0.0000             |                                      |
| 7 | 3 | 4 | 6    | 3         | 3         | 7807.3251 |            |            | 0.0008             |                                      |

**Table S37.** Measured frequencies and residuals (in MHz) of the rotational transitions of the (H<sub>2</sub><sup>16</sup>O) (H<sub>2</sub><sup>18</sup>O) isotopologue of isomer 3 / EQC-4-I.

|   |   |   | $J'$ | $K'_{-1}$ | $K'_{+1}$ | $J''$     | $K''_{-1}$ | $K''_{+1}$ | $\nu_{\text{obs}}$ | $\nu_{\text{obs}}-\nu_{\text{calc}}$ |
|---|---|---|------|-----------|-----------|-----------|------------|------------|--------------------|--------------------------------------|
| 3 | 1 | 3 | 2    | 1         | 2         | 2800.5570 |            | 0.0010     |                    |                                      |
| 3 | 0 | 3 | 2    | 0         | 2         | 2893.0013 |            | -0.0013    |                    |                                      |
| 3 | 1 | 2 | 2    | 1         | 1         | 3308.1454 |            | -0.0026    |                    |                                      |
| 4 | 1 | 4 | 3    | 1         | 3         | 3689.1411 |            | 0.0014     |                    |                                      |
| 4 | 0 | 4 | 3    | 0         | 3         | 3737.8229 |            | 0.0017     |                    |                                      |
| 4 | 2 | 3 | 3    | 2         | 2         | 4077.1364 |            | 0.0011     |                    |                                      |
| 4 | 3 | 1 | 3    | 3         | 0         | 4283.0269 |            | 0.0023     |                    |                                      |
| 4 | 2 | 2 | 3    | 2         | 1         | 4460.6594 |            | -0.0027    |                    |                                      |
| 5 | 1 | 5 | 4    | 1         | 4         | 4561.1750 |            | 0.0033     |                    |                                      |
| 5 | 2 | 4 | 4    | 2         | 3         | 5026.4674 |            | -0.0003    |                    |                                      |
| 5 | 1 | 4 | 4    | 1         | 3         | 5221.4269 |            | -0.0025    |                    |                                      |
| 5 | 3 | 3 | 4    | 3         | 2         | 5256.8571 |            | 0.0034     |                    |                                      |
| 5 | 4 | 1 | 4    | 4         | 0         | 5301.0060 |            | -0.0023    |                    |                                      |
| 6 | 1 | 6 | 5    | 1         | 5         | 5424.3493 |            | 0.0013     |                    |                                      |
| 6 | 0 | 6 | 5    | 0         | 5         | 5431.2987 |            | -0.0030    |                    |                                      |
| 5 | 3 | 2 | 4    | 3         | 1         | 5463.9929 |            | 0.0035     |                    |                                      |
| 6 | 2 | 5 | 5    | 2         | 4         | 5941.7048 |            | -0.0035    |                    |                                      |
| 6 | 1 | 5 | 5    | 1         | 4         | 6061.9311 |            | 0.0009     |                    |                                      |
| 6 | 3 | 4 | 5    | 3         | 3         | 6274.0897 |            | -0.0001    |                    |                                      |
| 7 | 1 | 7 | 6    | 1         | 6         | 6283.6914 |            | 0.0053     |                    |                                      |
| 7 | 0 | 7 | 6    | 0         | 6         | 6285.9373 |            | -0.0031    |                    |                                      |
| 6 | 4 | 3 | 5    | 4         | 2         | 6361.8139 |            | -0.0042    |                    |                                      |
| 6 | 2 | 4 | 5    | 2         | 3         | 6622.2342 |            | -0.0002    |                    |                                      |
| 6 | 3 | 3 | 5    | 3         | 2         | 6674.0141 |            | -0.0008    |                    |                                      |
| 7 | 2 | 6 | 6    | 2         | 5         | 6830.0957 |            | -0.0098    |                    |                                      |
| 7 | 1 | 6 | 6    | 1         | 5         | 6887.7957 |            | 0.0004     |                    |                                      |
| 7 | 3 | 5 | 6    | 3         | 4         | 7253.5938 |            | 0.0070     |                    |                                      |
| 7 | 4 | 4 | 6    | 4         | 3         | 7430.9402 |            | 0.0012     |                    |                                      |
| 7 | 2 | 5 | 6    | 2         | 4         | 7559.0396 |            | 0.0040     |                    |                                      |
| 7 | 4 | 3 | 6    | 4         | 2         | 7631.8739 |            | -0.0001    |                    |                                      |
| 7 | 3 | 4 | 6    | 3         | 3         | 7844.6749 |            | -0.0012    |                    |                                      |

**Table S38.** Measured frequencies and residuals (in MHz) of the rotational transitions of the (H<sub>2</sub><sup>18</sup>O) (H<sub>2</sub><sup>18</sup>O) isotopologue of isomer 3 / EQC-4-I.

|   |   |   | $J'$ | $K'_{-1}$ | $K'_{+1}$ | $J''$     | $K''_{-1}$ | $K''_{+1}$ | $\nu_{\text{obs}}$ | $\nu_{\text{obs}}-\nu_{\text{calc}}$ |
|---|---|---|------|-----------|-----------|-----------|------------|------------|--------------------|--------------------------------------|
| 3 | 1 | 3 | 2    | 1         | 2         | 2763.2203 |            | 0.0016     |                    |                                      |
| 3 | 0 | 3 | 2    | 0         | 2         | 2851.8209 |            | 0.0018     |                    |                                      |
| 3 | 2 | 2 | 2    | 2         | 1         | 3059.6489 |            | 0.0042     |                    |                                      |
| 3 | 2 | 1 | 2    | 2         | 0         | 3267.4990 |            | 0.0096     |                    |                                      |
| 3 | 1 | 2 | 2    | 1         | 1         | 3274.8585 |            | -0.0022    |                    |                                      |
| 4 | 1 | 4 | 3    | 1         | 3         | 3637.8239 |            | -0.0010    |                    |                                      |
| 4 | 0 | 4 | 3    | 0         | 3         | 3682.6258 |            | -0.0015    |                    |                                      |
| 4 | 2 | 3 | 3    | 2         | 2         | 4030.4229 |            | -0.0045    |                    |                                      |
| 4 | 3 | 2 | 3    | 3         | 1         | 4170.5218 |            | 0.0062     |                    |                                      |
| 4 | 3 | 1 | 3    | 3         | 0         | 4248.8178 |            | -0.0051    |                    |                                      |
| 4 | 1 | 3 | 3    | 1         | 2         | 4260.8859 |            | -0.0026    |                    |                                      |
| 4 | 2 | 2 | 3    | 2         | 1         | 4424.5730 |            | 0.0031     |                    |                                      |
| 5 | 1 | 5 | 4    | 1         | 4         | 4496.0172 |            | 0.0000     |                    |                                      |
| 5 | 0 | 5 | 4    | 0         | 4         | 4513.4864 |            | -0.0023    |                    |                                      |
| 5 | 2 | 4 | 4    | 2         | 3         | 4964.7609 |            | -0.0026    |                    |                                      |
| 5 | 1 | 4 | 4    | 1         | 3         | 5150.2658 |            | 0.0001     |                    |                                      |
| 5 | 3 | 3 | 4    | 3         | 2         | 5203.8326 |            | -0.0029    |                    |                                      |
| 5 | 4 | 2 | 4    | 4         | 1         | 5233.9120 |            | -0.0050    |                    |                                      |
| 5 | 4 | 1 | 4    | 4         | 0         | 5254.8239 |            | 0.0122     |                    |                                      |
| 6 | 1 | 6 | 5    | 1         | 5         | 5345.7510 |            | 0.0003     |                    |                                      |
| 6 | 0 | 6 | 5    | 0         | 5         | 5351.6707 |            | -0.0017    |                    |                                      |
| 5 | 3 | 2 | 4    | 3         | 1         | 5425.8267 |            | 0.0060     |                    |                                      |
| 5 | 2 | 3 | 4    | 2         | 2         | 5529.8006 |            | 0.0005     |                    |                                      |
| 6 | 2 | 5 | 5    | 2         | 4         | 5864.3086 |            | -0.0028    |                    |                                      |
| 6 | 1 | 5 | 5    | 1         | 4         | 5973.6909 |            | -0.0027    |                    |                                      |
| 7 | 1 | 7 | 6    | 1         | 6         | 6191.9720 |            | 0.0071     |                    |                                      |
| 7 | 0 | 7 | 6    | 0         | 6         | 6193.8142 |            | -0.0018    |                    |                                      |
| 6 | 3 | 4 | 5    | 3         | 3         | 6206.4228 |            | -0.0003    |                    |                                      |
| 6 | 4 | 3 | 5    | 4         | 2         | 6302.8177 |            | 0.0010     |                    |                                      |
| 6 | 4 | 2 | 5    | 4         | 1         | 6386.1534 |            | -0.0098    |                    |                                      |
| 6 | 2 | 4 | 5    | 2         | 3         | 6548.4982 |            | -0.0035    |                    |                                      |
| 6 | 3 | 3 | 5    | 3         | 2         | 6625.9377 |            | 0.0032     |                    |                                      |
| 7 | 2 | 6 | 6    | 2         | 5         | 6737.3016 |            | -0.0063    |                    |                                      |
| 7 | 1 | 6 | 6    | 1         | 5         | 6787.4644 |            | 0.0012     |                    |                                      |
| 7 | 3 | 5 | 6    | 3         | 4         | 7169.2498 |            | 0.0029     |                    |                                      |
| 7 | 4 | 4 | 6    | 4         | 3         | 7359.4372 |            | -0.0028    |                    |                                      |
| 7 | 2 | 5 | 6    | 2         | 4         | 7459.3382 |            | 0.0056     |                    |                                      |
| 7 | 4 | 3 | 6    | 4         | 2         | 7581.8361 |            | -0.0020    |                    |                                      |
| 8 | 1 | 7 | 7    | 1         | 6         | 7613.7385 |            | 0.0045     |                    |                                      |
| 7 | 3 | 4 | 6    | 3         | 3         | 7777.7163 |            | -0.0028    |                    |                                      |

**Table S39.** Measured frequencies and residuals (in MHz) of the rotational transitions of the parent species of **isomer 4 / EQC-1-I**.

|   |   |   | $J'$ | $K'_{-1}$ | $K'_{+1}$ | $J''$     | $K''_{-1}$ | $K''_{+1}$ | $\nu_{\text{obs}}$ | $\nu_{\text{obs}}-\nu_{\text{calc}}$ |
|---|---|---|------|-----------|-----------|-----------|------------|------------|--------------------|--------------------------------------|
| 3 | 0 | 3 | 2    | 0         | 2         | 3053.1971 |            | 0.0023     |                    |                                      |
| 3 | 2 | 1 | 2    | 2         | 0         | 3207.8016 |            | 0.0051     |                    |                                      |
| 2 | 2 | 1 | 1    | 1         | 0         | 3520.8559 |            | -0.0137    |                    |                                      |
| 4 | 1 | 4 | 3    | 1         | 3         | 3906.2871 |            | 0.0028     |                    |                                      |
| 4 | 0 | 4 | 3    | 0         | 3         | 3999.9870 |            | -0.0018    |                    |                                      |
| 4 | 2 | 3 | 3    | 2         | 2         | 4158.0892 |            | -0.0053    |                    |                                      |
| 4 | 3 | 1 | 3    | 3         | 0         | 4221.7885 |            | -0.0077    |                    |                                      |
| 4 | 2 | 2 | 3    | 2         | 1         | 4331.9141 |            | 0.0043     |                    |                                      |
| 4 | 1 | 3 | 3    | 1         | 2         | 4359.1786 |            | -0.0014    |                    |                                      |
| 3 | 2 | 2 | 2    | 1         | 1         | 4447.8280 |            | -0.0025    |                    |                                      |
| 5 | 0 | 5 | 4    | 1         | 4         | 4782.0062 |            | 0.0067     |                    |                                      |
| 5 | 1 | 5 | 4    | 1         | 4         | 4857.5413 |            | -0.0035    |                    |                                      |
| 5 | 0 | 5 | 4    | 0         | 4         | 4921.9540 |            | 0.0012     |                    |                                      |
| 5 | 1 | 5 | 4    | 0         | 4         | 4997.4930 |            | -0.0052    |                    |                                      |
| 5 | 2 | 4 | 4    | 2         | 3         | 5172.5561 |            | 0.0089     |                    |                                      |
| 5 | 3 | 3 | 4    | 3         | 2         | 5266.8095 |            | -0.0045    |                    |                                      |
| 5 | 3 | 2 | 4    | 3         | 1         | 5310.9018 |            | -0.0069    |                    |                                      |
| 5 | 1 | 4 | 4    | 1         | 3         | 5396.0393 |            | 0.0043     |                    |                                      |
| 5 | 2 | 3 | 4    | 2         | 2         | 5466.4717 |            | -0.0105    |                    |                                      |
| 3 | 3 | 0 | 2    | 2         | 1         | 5631.3105 |            | 0.0044     |                    |                                      |
| 6 | 0 | 6 | 5    | 1         | 5         | 5761.8131 |            | 0.0030     |                    |                                      |
| 6 | 1 | 6 | 5    | 1         | 5         | 5799.6696 |            | -0.0031    |                    |                                      |
| 6 | 1 | 6 | 5    | 0         | 5         | 5875.2097 |            | -0.0084    |                    |                                      |
| 6 | 2 | 5 | 5    | 2         | 4         | 6171.6410 |            | 0.0127     |                    |                                      |
| 6 | 3 | 4 | 5    | 3         | 3         | 6321.3471 |            | 0.0080     |                    |                                      |
| 6 | 1 | 5 | 5    | 1         | 4         | 6390.8759 |            | 0.0017     |                    |                                      |
| 6 | 3 | 3 | 5    | 3         | 2         | 6429.0891 |            | -0.0027    |                    |                                      |
| 6 | 2 | 4 | 5    | 2         | 3         | 6588.1571 |            | 0.0015     |                    |                                      |
| 4 | 3 | 2 | 3    | 2         | 1         | 6609.6149 |            | 0.0052     |                    |                                      |
| 7 | 0 | 7 | 6    | 1         | 6         | 6717.2507 |            | 0.0028     |                    |                                      |
| 4 | 3 | 1 | 3    | 2         | 2         | 6722.6166 |            | -0.0026    |                    |                                      |
| 7 | 1 | 7 | 6    | 1         | 6         | 6735.2776 |            | -0.0013    |                    |                                      |
| 7 | 0 | 7 | 6    | 0         | 6         | 6755.1058 |            | -0.0047    |                    |                                      |
| 7 | 2 | 6 | 6    | 2         | 5         | 7154.4087 |            | 0.0076     |                    |                                      |
| 7 | 1 | 6 | 6    | 1         | 5         | 7340.7560 |            | 0.0108     |                    |                                      |
| 7 | 3 | 4 | 6    | 3         | 3         | 7576.3855 |            | -0.0159    |                    |                                      |
| 8 | 0 | 8 | 7    | 1         | 7         | 7658.4996 |            | 0.0030     |                    |                                      |
| 8 | 1 | 8 | 7    | 1         | 7         | 7666.7743 |            | -0.0040    |                    |                                      |
| 8 | 0 | 8 | 7    | 0         | 7         | 7676.5256 |            | -0.0019    |                    |                                      |
| 7 | 2 | 5 | 6    | 2         | 4         | 7681.0088 |            | 0.0111     |                    |                                      |
| 8 | 1 | 8 | 7    | 0         | 7         | 7684.8027 |            | -0.0066    |                    |                                      |

**Table S40.** Measured frequencies and residuals (in MHz) of the rotational transitions of the (H<sub>2</sub><sup>18</sup>O)(H<sub>2</sub><sup>16</sup>O) isotopologue of isomer 4 / EQC-1-I.

|   |   |   | $J'$ | $K'_{-1}$ | $K'_{+1}$ | $J''$     | $K''_{-1}$ | $K''_{+1}$ | $\nu_{\text{obs}}$ | $\nu_{\text{obs}}-\nu_{\text{calc}}$ |
|---|---|---|------|-----------|-----------|-----------|------------|------------|--------------------|--------------------------------------|
| 4 | 0 | 4 | 3    | 0         | 3         | 3938.1033 |            |            | -0.0129            |                                      |
| 5 | 1 | 5 | 4    | 1         | 4         | 4784.3129 |            |            | 0.0050             |                                      |
| 5 | 0 | 5 | 4    | 0         | 4         | 4841.6301 |            |            | 0.0074             |                                      |
| 5 | 1 | 4 | 4    | 1         | 3         | 5337.8347 |            |            | -0.0036            |                                      |
| 6 | 1 | 6 | 5    | 1         | 5         | 5709.5291 |            |            | -0.0071            |                                      |
| 6 | 0 | 6 | 5    | 0         | 5         | 5741.1251 |            |            | -0.0132            |                                      |
| 6 | 1 | 5 | 5    | 1         | 4         | 6308.2553 |            |            | 0.0063             |                                      |
| 7 | 1 | 7 | 6    | 1         | 6         | 6628.4061 |            |            | 0.0048             |                                      |
| 7 | 0 | 7 | 6    | 0         | 6         | 6644.1279 |            |            | 0.0083             |                                      |
| 7 | 1 | 6 | 6    | 1         | 5         | 7231.6087 |            |            | 0.0255             |                                      |

**Table S41.** Measured frequencies and residuals (in MHz) of the rotational transitions of the (H<sub>2</sub><sup>16</sup>O)(H<sub>2</sub><sup>18</sup>O) isotopologue of isomer 4 / EQC-1-I.

|   |   |   | $J'$ | $K'_{-1}$ | $K'_{+1}$ | $J''$     | $K''_{-1}$ | $K''_{+1}$ | $\nu_{\text{obs}}$ | $\nu_{\text{obs}}-\nu_{\text{calc}}$ |
|---|---|---|------|-----------|-----------|-----------|------------|------------|--------------------|--------------------------------------|
| 4 | 1 | 3 | 3    | 1         | 2         | 4316.3003 |            |            | -0.0018            |                                      |
| 5 | 1 | 5 | 4    | 1         | 4         | 4783.4077 |            |            | 0.0025             |                                      |
| 5 | 0 | 5 | 4    | 0         | 4         | 4841.3752 |            |            | -0.0059            |                                      |
| 5 | 1 | 4 | 4    | 1         | 3         | 5334.6828 |            |            | 0.0033             |                                      |
| 6 | 0 | 6 | 5    | 0         | 5         | 5740.8908 |            |            | -0.0079            |                                      |
| 6 | 1 | 5 | 5    | 1         | 4         | 6305.9705 |            |            | -0.0052            |                                      |
| 7 | 0 | 7 | 6    | 0         | 6         | 6643.7831 |            |            | 0.0072             |                                      |
| 7 | 1 | 6 | 6    | 1         | 5         | 7230.4154 |            |            | 0.0051             |                                      |

**Table S42.** Measured frequencies and residuals (in MHz) of the rotational transitions of the parent species of **isomer 5 / EQC-2-I**.

|   |   |   | $J'$ | $K'_{-1}$ | $K'_{+1}$ | $J''$     | $K''_{-1}$ | $K''_{+1}$ | $V_{\text{obs}}$ | $V_{\text{obs}}-V_{\text{calc}}$ |
|---|---|---|------|-----------|-----------|-----------|------------|------------|------------------|----------------------------------|
| 3 | 1 | 3 | 2    | 1         | 2         | 2700.8586 |            |            | 0.0016           |                                  |
| 3 | 0 | 3 | 2    | 0         | 2         | 2814.8541 |            |            | -0.0031          |                                  |
| 3 | 2 | 2 | 2    | 2         | 1         | 2878.7850 |            |            | 0.0044           |                                  |
| 3 | 2 | 1 | 2    | 2         | 0         | 2942.7043 |            |            | 0.0000           |                                  |
| 3 | 1 | 2 | 2    | 1         | 1         | 3035.8060 |            |            | -0.0002          |                                  |
| 4 | 1 | 4 | 3    | 1         | 3         | 3585.0797 |            |            | 0.0016           |                                  |
| 4 | 0 | 4 | 3    | 0         | 3         | 3690.8433 |            |            | -0.0038          |                                  |
| 4 | 3 | 1 | 3    | 3         | 0         | 3876.4603 |            |            | 0.0045           |                                  |
| 4 | 2 | 2 | 3    | 2         | 1         | 3972.8233 |            |            | 0.0028           |                                  |
| 4 | 1 | 3 | 3    | 1         | 2         | 4024.5935 |            |            | -0.0021          |                                  |
| 5 | 1 | 5 | 4    | 1         | 4         | 4459.3497 |            |            | 0.0011           |                                  |
| 5 | 0 | 5 | 4    | 0         | 4         | 4539.4748 |            |            | -0.0042          |                                  |
| 5 | 2 | 4 | 4    | 2         | 3         | 4761.2456 |            |            | 0.0075           |                                  |
| 5 | 3 | 3 | 4    | 3         | 2         | 4840.4548 |            |            | 0.0011           |                                  |
| 5 | 3 | 2 | 4    | 3         | 1         | 4871.4155 |            |            | -0.0095          |                                  |
| 5 | 1 | 4 | 4    | 1         | 3         | 4989.1743 |            |            | -0.0038          |                                  |
| 5 | 2 | 3 | 4    | 2         | 2         | 5018.7494 |            |            | 0.0040           |                                  |
| 6 | 1 | 6 | 5    | 1         | 5         | 5324.7968 |            |            | 0.0031           |                                  |
| 6 | 0 | 6 | 5    | 0         | 5         | 5376.6934 |            |            | -0.0041          |                                  |
| 6 | 2 | 5 | 5    | 2         | 4         | 5684.1648 |            |            | 0.0064           |                                  |
| 6 | 3 | 4 | 5    | 3         | 3         | 5811.9626 |            |            | -0.0018          |                                  |
| 6 | 3 | 3 | 5    | 3         | 2         | 5889.6567 |            |            | -0.0037          |                                  |
| 6 | 1 | 5 | 5    | 1         | 4         | 5919.9663 |            |            | -0.0069          |                                  |
| 6 | 2 | 4 | 5    | 2         | 3         | 6060.7696 |            |            | 0.0060           |                                  |
| 7 | 0 | 7 | 6    | 0         | 6         | 6213.5129 |            |            | -0.0015          |                                  |
| 7 | 2 | 6 | 6    | 2         | 5         | 6592.9433 |            |            | 0.0098           |                                  |
| 7 | 3 | 5 | 6    | 3         | 4         | 6777.8432 |            |            | -0.0051          |                                  |
| 7 | 1 | 6 | 6    | 1         | 5         | 6810.6216 |            |            | 0.0008           |                                  |
| 7 | 3 | 4 | 6    | 3         | 3         | 6935.2549 |            |            | -0.0056          |                                  |
| 8 | 0 | 8 | 7    | 0         | 7         | 7053.4803 |            |            | -0.0060          |                                  |
| 8 | 2 | 7 | 7    | 2         | 6         | 7487.4374 |            |            | 0.0091           |                                  |
| 8 | 1 | 7 | 7    | 1         | 6         | 7664.5048 |            |            | -0.0006          |                                  |
| 8 | 3 | 6 | 7    | 3         | 5         | 7734.1044 |            |            | -0.0007          |                                  |



**Table S43.** Measured frequencies and residuals (in MHz) of the rotational transitions of the (H<sub>2</sub><sup>18</sup>O)(H<sub>2</sub><sup>16</sup>O) isotopologue of isomer 5 / EQC-2-I.

|   |   |   | $J'$ | $K'_{-1}$ | $K'_{+1}$ | $J''$     | $K''_{-1}$ | $K''_{+1}$ | $\nu_{\text{obs}}$ | $\nu_{\text{obs}}-\nu_{\text{calc}}$ |
|---|---|---|------|-----------|-----------|-----------|------------|------------|--------------------|--------------------------------------|
| 3 | 1 | 3 | 2    | 1         | 2         | 2644.8512 |            |            | 0.0041             |                                      |
| 3 | 0 | 3 | 2    | 0         | 2         | 2757.2656 |            |            | 0.0059             |                                      |
| 3 | 2 | 1 | 2    | 2         | 0         | 2879.5342 |            |            | -0.0006            |                                      |
| 3 | 1 | 2 | 2    | 1         | 1         | 2971.9999 |            |            | 0.0018             |                                      |
| 4 | 1 | 4 | 3    | 1         | 3         | 3511.0590 |            |            | -0.0001            |                                      |
| 4 | 0 | 4 | 3    | 0         | 3         | 3616.3423 |            |            | -0.0045            |                                      |
| 4 | 2 | 3 | 3    | 2         | 2         | 3745.5021 |            |            | 0.0039             |                                      |
| 4 | 2 | 2 | 3    | 2         | 1         | 3886.8906 |            |            | -0.0025            |                                      |
| 4 | 1 | 3 | 3    | 1         | 2         | 3940.6416 |            |            | -0.0008            |                                      |
| 5 | 1 | 5 | 4    | 1         | 4         | 4367.6551 |            |            | 0.0018             |                                      |
| 5 | 0 | 5 | 4    | 0         | 4         | 4448.3894 |            |            | -0.0027            |                                      |
| 5 | 2 | 4 | 4    | 2         | 3         | 4662.2483 |            |            | 0.0023             |                                      |
| 5 | 3 | 3 | 4    | 3         | 2         | 4738.1774 |            |            | 0.0106             |                                      |
| 5 | 3 | 2 | 4    | 3         | 1         | 4767.1335 |            |            | -0.0063            |                                      |
| 5 | 1 | 4 | 4    | 1         | 3         | 4886.3023 |            |            | -0.0068            |                                      |
| 5 | 2 | 3 | 4    | 2         | 2         | 4910.2838 |            |            | 0.0006             |                                      |
| 6 | 1 | 6 | 5    | 1         | 5         | 5215.6459 |            |            | -0.0002            |                                      |
| 6 | 0 | 6 | 5    | 0         | 5         | 5268.6237 |            |            | -0.0059            |                                      |
| 6 | 2 | 5 | 5    | 2         | 4         | 5566.6531 |            |            | 0.0089             |                                      |
| 6 | 3 | 4 | 5    | 3         | 3         | 5689.3808 |            |            | 0.0059             |                                      |
| 6 | 3 | 3 | 5    | 3         | 2         | 5762.2690 |            |            | 0.0017             |                                      |
| 6 | 1 | 5 | 5    | 1         | 4         | 5799.8229 |            |            | -0.0040            |                                      |
| 6 | 2 | 4 | 5    | 2         | 3         | 5930.9055 |            |            | -0.0059            |                                      |
| 7 | 1 | 7 | 6    | 1         | 6         | 6056.8855 |            |            | -0.0025            |                                      |
| 7 | 0 | 7 | 6    | 0         | 6         | 6088.0300 |            |            | -0.0100            |                                      |
| 7 | 2 | 6 | 6    | 2         | 5         | 6457.4469 |            |            | 0.0048             |                                      |
| 7 | 3 | 5 | 6    | 3         | 4         | 6635.4141 |            |            | 0.0023             |                                      |
| 7 | 3 | 4 | 6    | 3         | 3         | 6783.7980 |            |            | -0.0043            |                                      |
| 8 | 1 | 8 | 7    | 1         | 7         | 6893.3985 |            |            | -0.0007            |                                      |
| 8 | 0 | 8 | 7    | 0         | 7         | 6910.4142 |            |            | -0.0041            |                                      |
| 7 | 2 | 5 | 6    | 2         | 4         | 6933.1282 |            |            | -0.0004            |                                      |
| 8 | 2 | 7 | 7    | 2         | 6         | 7334.4401 |            |            | 0.0113             |                                      |
| 8 | 3 | 6 | 7    | 3         | 5         | 7572.4486 |            |            | 0.0117             |                                      |
| 8 | 3 | 5 | 7    | 3         | 4         | 7826.9159 |            |            | -0.0042            |                                      |
| 8 | 2 | 6 | 7    | 2         | 5         | 7906.8696 |            |            | -0.0075            |                                      |

**Table S44.** Measured frequencies and residuals (in MHz) of the rotational transitions of the (H<sub>2</sub><sup>16</sup>O) (H<sub>2</sub><sup>18</sup>O) isotopologue of isomer 5 / EQC-2-I.

|   |   |   | $J'$ | $K'_{-1}$ | $K'_{+1}$ | $J''$     | $K''_{-1}$ | $K''_{+1}$ | $\nu_{\text{obs}}$ | $\nu_{\text{obs}}-\nu_{\text{calc}}$ |
|---|---|---|------|-----------|-----------|-----------|------------|------------|--------------------|--------------------------------------|
| 3 | 1 | 3 | 2    | 1         | 2         | 2670.4388 |            |            | -0.0065            |                                      |
| 3 | 0 | 3 | 2    | 0         | 2         | 2783.5470 |            |            | 0.0043             |                                      |
| 3 | 2 | 2 | 2    | 2         | 1         | 2855.4542 |            |            | 0.0111             |                                      |
| 3 | 2 | 1 | 2    | 2         | 0         | 2927.3400 |            |            | -0.0032            |                                      |
| 3 | 1 | 2 | 2    | 1         | 1         | 3016.7308 |            |            | -0.0022            |                                      |
| 4 | 1 | 4 | 3    | 1         | 3         | 3542.7239 |            |            | 0.0048             |                                      |
| 4 | 0 | 4 | 3    | 0         | 3         | 3643.4554 |            |            | -0.0012            |                                      |
| 4 | 2 | 3 | 3    | 2         | 2         | 3792.5826 |            |            | -0.0015            |                                      |
| 4 | 3 | 1 | 3    | 3         | 0         | 3850.9535 |            |            | 0.0048             |                                      |
| 4 | 2 | 2 | 3    | 2         | 1         | 3956.2140 |            |            | 0.0038             |                                      |
| 4 | 1 | 3 | 3    | 1         | 2         | 3995.6749 |            |            | -0.0024            |                                      |
| 5 | 1 | 5 | 4    | 1         | 4         | 4404.2981 |            |            | -0.0004            |                                      |
| 5 | 0 | 5 | 4    | 0         | 4         | 4476.7928 |            |            | -0.0008            |                                      |
| 5 | 2 | 4 | 4    | 2         | 3         | 4717.5204 |            |            | 0.0086             |                                      |
| 5 | 3 | 3 | 4    | 3         | 2         | 4805.8534 |            |            | -0.0009            |                                      |
| 5 | 3 | 2 | 4    | 3         | 1         | 4843.9245 |            |            | -0.0101            |                                      |
| 5 | 2 | 3 | 4    | 2         | 2         | 4998.4653 |            |            | -0.0040            |                                      |
| 6 | 1 | 6 | 5    | 1         | 5         | 5256.7249 |            |            | -0.0040            |                                      |
| 6 | 0 | 6 | 5    | 0         | 5         | 5301.2049 |            |            | 0.0000             |                                      |
| 6 | 2 | 5 | 5    | 2         | 4         | 5628.0436 |            |            | 0.0037             |                                      |
| 6 | 3 | 4 | 5    | 3         | 3         | 5769.3797 |            |            | 0.0003             |                                      |
| 6 | 1 | 5 | 5    | 1         | 4         | 5858.7010 |            |            | -0.0005            |                                      |
| 6 | 3 | 3 | 5    | 3         | 2         | 5863.6622 |            |            | 0.0050             |                                      |
| 6 | 2 | 4 | 5    | 2         | 3         | 6031.9772 |            |            | -0.0042            |                                      |
| 7 | 1 | 7 | 6    | 1         | 6         | 6102.3596 |            |            | 0.0003             |                                      |
| 7 | 0 | 7 | 6    | 0         | 6         | 6126.8470 |            |            | -0.0098            |                                      |
| 7 | 2 | 6 | 6    | 2         | 5         | 6523.0390 |            |            | 0.0016             |                                      |
| 7 | 3 | 5 | 6    | 3         | 4         | 6725.5856 |            |            | 0.0003             |                                      |
| 7 | 1 | 6 | 6    | 1         | 5         | 6727.1760 |            |            | 0.0005             |                                      |
| 8 | 1 | 8 | 7    | 1         | 7         | 6943.5149 |            |            | 0.0052             |                                      |

**Table S45.** Measured frequencies and residuals (in MHz) of the rotational transitions of the (H<sub>2</sub><sup>18</sup>O) (H<sub>2</sub><sup>18</sup>O) isotopologue of isomer 5 / EQC-2-I.

|   |   |   | $J'$ | $K'_{-1}$ | $K'_{+1}$ | $J''$     | $K''_{-1}$ | $K''_{+1}$ | $\nu_{\text{obs}}$ | $\nu_{\text{obs}}-\nu_{\text{calc}}$ |
|---|---|---|------|-----------|-----------|-----------|------------|------------|--------------------|--------------------------------------|
| 3 | 1 | 3 | 2    | 1         | 2         | 2616.1961 |            |            | -0.0030            |                                      |
| 3 | 0 | 3 | 2    | 0         | 2         | 2727.8264 |            |            | -0.0074            |                                      |
| 3 | 2 | 2 | 2    | 2         | 1         | 2796.1933 |            |            | 0.0135             |                                      |
| 3 | 2 | 1 | 2    | 2         | 0         | 2864.5282 |            |            | 0.0022             |                                      |
| 3 | 1 | 2 | 2    | 1         | 1         | 2953.6811 |            |            | -0.0044            |                                      |
| 4 | 1 | 4 | 3    | 1         | 3         | 3471.2186 |            |            | 0.0002             |                                      |
| 4 | 0 | 4 | 3    | 0         | 3         | 3571.9088 |            |            | -0.0005            |                                      |
| 4 | 2 | 2 | 3    | 2         | 1         | 3870.4958 |            |            | 0.0013             |                                      |
| 4 | 1 | 3 | 3    | 1         | 2         | 3913.1017 |            |            | -0.0036            |                                      |
| 5 | 1 | 5 | 4    | 1         | 4         | 4315.9263 |            |            | -0.0027            |                                      |
| 5 | 0 | 5 | 4    | 0         | 4         | 4389.5311 |            |            | -0.0044            |                                      |
| 5 | 2 | 4 | 4    | 2         | 3         | 4620.8736 |            |            | 0.0090             |                                      |
| 5 | 1 | 4 | 4    | 1         | 3         | 4846.0671 |            |            | -0.0036            |                                      |
| 6 | 0 | 6 | 5    | 0         | 5         | 5197.6256 |            |            | -0.0021            |                                      |
| 6 | 2 | 5 | 5    | 2         | 4         | 5513.6933 |            |            | 0.0061             |                                      |
| 6 | 3 | 4 | 5    | 3         | 3         | 5648.7382 |            |            | 0.0110             |                                      |
| 6 | 3 | 3 | 5    | 3         | 2         | 5736.3801 |            |            | 0.0060             |                                      |
| 6 | 1 | 5 | 5    | 1         | 4         | 5742.4415 |            |            | 0.0046             |                                      |
| 6 | 2 | 4 | 5    | 2         | 3         | 5903.2224 |            |            | -0.0201            |                                      |
| 7 | 1 | 7 | 6    | 1         | 6         | 5980.7898 |            |            | -0.0076            |                                      |
| 7 | 0 | 7 | 6    | 0         | 6         | 6006.4830 |            |            | -0.0027            |                                      |
| 7 | 2 | 6 | 6    | 2         | 5         | 6391.6431 |            |            | 0.0100             |                                      |
| 7 | 1 | 6 | 6    | 1         | 5         | 6596.7743 |            |            | 0.0023             |                                      |
| 7 | 3 | 4 | 6    | 3         | 3         | 6760.6819 |            |            | 0.0010             |                                      |
| 7 | 2 | 5 | 6    | 2         | 4         | 6892.9780 |            |            | -0.0055            |                                      |

**Table S46.** Measured frequencies and residuals (in MHz) of the rotational transitions of the parent species of **isomer 6 / EQa-4-I**.

|   |   |   | $J'$ | $K'_{-1}$ | $K'_{+1}$ | $J''$     | $K''_{-1}$ | $K''_{+1}$ | $V_{\text{obs}}$ | $V_{\text{obs}}-V_{\text{calc}}$ |
|---|---|---|------|-----------|-----------|-----------|------------|------------|------------------|----------------------------------|
| 2 | 1 | 1 | 1    | 0         | 1         | 2727.6721 |            |            | 0.0054           |                                  |
| 3 | 1 | 3 | 2    | 1         | 2         | 2990.9915 |            |            | -0.0060          |                                  |
| 3 | 0 | 3 | 2    | 0         | 2         | 3091.9507 |            |            | -0.0040          |                                  |
| 3 | 2 | 2 | 2    | 2         | 1         | 3173.1695 |            |            | 0.0120           |                                  |
| 3 | 2 | 1 | 2    | 2         | 0         | 3254.3661 |            |            | -0.0069          |                                  |
| 3 | 1 | 2 | 2    | 1         | 1         | 3328.0363 |            |            | 0.0004           |                                  |
| 2 | 2 | 0 | 1    | 1         | 0         | 3407.5197 |            |            | 0.0189           |                                  |
| 2 | 2 | 1 | 1    | 1         | 1         | 3499.2241 |            |            | -0.0218          |                                  |
| 4 | 1 | 4 | 3    | 1         | 3         | 3968.2099 |            |            | -0.0022          |                                  |
| 4 | 0 | 4 | 3    | 0         | 3         | 4050.8537 |            |            | -0.0042          |                                  |
| 4 | 2 | 3 | 3    | 2         | 2         | 4214.0201 |            |            | -0.0048          |                                  |
| 4 | 3 | 2 | 3    | 3         | 1         | 4267.0890 |            |            | 0.0027           |                                  |
| 4 | 3 | 1 | 3    | 3         | 0         | 4282.2967 |            |            | -0.0043          |                                  |
| 4 | 2 | 2 | 3    | 2         | 1         | 4393.7928 |            |            | 0.0028           |                                  |
| 4 | 1 | 3 | 3    | 1         | 2         | 4405.8475 |            |            | -0.0011          |                                  |
| 3 | 2 | 1 | 2    | 1         | 1         | 4433.2197 |            |            | 0.0070           |                                  |
| 5 | 1 | 5 | 4    | 1         | 4         | 4934.4143 |            |            | 0.0015           |                                  |
| 5 | 0 | 5 | 4    | 0         | 4         | 4988.1042 |            |            | -0.0037          |                                  |
| 5 | 2 | 4 | 4    | 2         | 3         | 5241.0217 |            |            | -0.0002          |                                  |
| 5 | 3 | 3 | 4    | 3         | 2         | 5339.2514 |            |            | 0.0100           |                                  |
| 5 | 3 | 2 | 4    | 3         | 1         | 5389.6398 |            |            | -0.0013          |                                  |
| 5 | 1 | 4 | 4    | 1         | 3         | 5450.0423 |            |            | -0.0111          |                                  |
| 4 | 2 | 2 | 3    | 1         | 2         | 5498.9730 |            |            | 0.0064           |                                  |
| 5 | 2 | 3 | 4    | 2         | 2         | 5539.4542 |            |            | 0.0021           |                                  |
| 6 | 1 | 6 | 5    | 1         | 5         | 5891.8774 |            |            | 0.0142           |                                  |
| 6 | 0 | 6 | 5    | 0         | 5         | 5921.5332 |            |            | -0.0048          |                                  |
| 6 | 2 | 5 | 5    | 2         | 4         | 6252.0184 |            |            | -0.0020          |                                  |
| 6 | 3 | 4 | 5    | 3         | 3         | 6406.5449 |            |            | 0.0002           |                                  |
| 6 | 1 | 5 | 5    | 1         | 4         | 6449.9445 |            |            | 0.0040           |                                  |
| 5 | 2 | 3 | 4    | 1         | 3         | 6632.5648 |            |            | -0.0053          |                                  |
| 6 | 2 | 4 | 5    | 2         | 3         | 6667.8121 |            |            | 0.0076           |                                  |
| 7 | 1 | 7 | 6    | 1         | 6         | 6843.3645 |            |            | 0.0010           |                                  |
| 7 | 0 | 7 | 6    | 0         | 6         | 6858.1491 |            |            | -0.0066          |                                  |
| 7 | 2 | 6 | 6    | 2         | 5         | 7246.4203 |            |            | 0.0028           |                                  |
| 5 | 3 | 2 | 4    | 2         | 2         | 7402.4012 |            |            | 0.0129           |                                  |
| 7 | 1 | 6 | 6    | 1         | 5         | 7405.9775 |            |            | -0.0020          |                                  |
| 7 | 3 | 5 | 6    | 3         | 4         | 7463.6503 |            |            | -0.0029          |                                  |
| 5 | 3 | 3 | 4    | 2         | 3         | 7616.6061 |            |            | -0.0164          |                                  |
| 7 | 3 | 4 | 6    | 3         | 3         | 7692.2714 |            |            | -0.0022          |                                  |
| 7 | 2 | 5 | 6    | 2         | 4         | 7763.8153 |            |            | 0.0027           |                                  |

**Table S47.** Measured frequencies and residuals (in MHz) of the rotational transitions of the (H<sub>2</sub><sup>18</sup>O) (H<sub>2</sub><sup>16</sup>O) isotopologue of isomer 6 / EQa-4-I.

|   |   |   | $J'$ | $K'_{-1}$ | $K'_{+1}$ | $J''$     | $K''_{-1}$ | $K''_{+1}$ | $V_{\text{obs}}$ | $V_{\text{obs}}-V_{\text{calc}}$ |
|---|---|---|------|-----------|-----------|-----------|------------|------------|------------------|----------------------------------|
| 3 | 1 | 3 | 2    | 1         | 2         | 2953.1925 |            | 0.0045     |                  |                                  |
| 3 | 0 | 3 | 2    | 0         | 2         | 3051.7747 |            | -0.0022    |                  |                                  |
| 3 | 1 | 2 | 2    | 1         | 1         | 3284.0897 |            | 0.0048     |                  |                                  |
| 4 | 1 | 4 | 3    | 1         | 3         | 3918.0307 |            | 0.0065     |                  |                                  |
| 4 | 0 | 4 | 3    | 0         | 3         | 3998.3125 |            | -0.0039    |                  |                                  |
| 4 | 2 | 3 | 3    | 2         | 2         | 4159.5009 |            | -0.0088    |                  |                                  |
| 4 | 2 | 2 | 3    | 2         | 1         | 4337.1597 |            | 0.0136     |                  |                                  |
| 4 | 1 | 3 | 3    | 1         | 2         | 4347.4765 |            | -0.0013    |                  |                                  |
| 5 | 1 | 5 | 4    | 1         | 4         | 4872.0116 |            | -0.0090    |                  |                                  |
| 5 | 0 | 5 | 4    | 0         | 4         | 4923.8648 |            | -0.0059    |                  |                                  |
| 5 | 2 | 3 | 4    | 2         | 2         | 5467.4423 |            | -0.0042    |                  |                                  |
| 6 | 1 | 6 | 5    | 1         | 5         | 5817.4530 |            | 0.0086     |                  |                                  |
| 6 | 2 | 5 | 5    | 2         | 4         | 6170.9319 |            | -0.0016    |                  |                                  |
| 6 | 1 | 5 | 5    | 1         | 4         | 6363.6669 |            | 0.0086     |                  |                                  |
| 6 | 2 | 4 | 5    | 2         | 3         | 6580.2498 |            | -0.0071    |                  |                                  |

**Table S48.** Measured frequencies and residuals (in MHz) of the rotational transitions of the (H<sub>2</sub><sup>16</sup>O) (H<sub>2</sub><sup>18</sup>O) isotopologue of isomer 6 / EQa-4-I.

|   |   |   | $J'$ | $K'_{-1}$ | $K'_{+1}$ | $J''$     | $K''_{-1}$ | $K''_{+1}$ | $V_{\text{obs}}$ | $V_{\text{obs}}-V_{\text{calc}}$ |
|---|---|---|------|-----------|-----------|-----------|------------|------------|------------------|----------------------------------|
| 3 | 1 | 3 | 2    | 1         | 2         | 2951.4920 |            | 0.0069     |                  |                                  |
| 3 | 0 | 3 | 2    | 0         | 2         | 3050.3536 |            | -0.0025    |                  |                                  |
| 3 | 1 | 2 | 2    | 1         | 1         | 3311.5033 |            | 0.0049     |                  |                                  |
| 4 | 1 | 4 | 3    | 1         | 3         | 3911.8739 |            | -0.0033    |                  |                                  |
| 4 | 0 | 4 | 3    | 0         | 3         | 3986.3911 |            | -0.0040    |                  |                                  |
| 4 | 2 | 3 | 3    | 2         | 2         | 4177.0318 |            | 0.0020     |                  |                                  |
| 5 | 1 | 5 | 4    | 1         | 4         | 4860.1261 |            | -0.0077    |                  |                                  |
| 6 | 1 | 6 | 5    | 1         | 5         | 5799.4417 |            | 0.0158     |                  |                                  |
| 6 | 2 | 5 | 5    | 2         | 4         | 6181.9112 |            | -0.0112    |                  |                                  |
| 6 | 1 | 5 | 5    | 1         | 4         | 6365.9453 |            | -0.0005    |                  |                                  |
| 6 | 2 | 4 | 5    | 2         | 3         | 6642.5991 |            | 0.0027     |                  |                                  |
| 7 | 2 | 6 | 6    | 2         | 5         | 7156.0732 |            | -0.0070    |                  |                                  |
| 7 | 1 | 6 | 6    | 1         | 5         | 7290.8042 |            | 0.0053     |                  |                                  |
| 7 | 2 | 5 | 6    | 2         | 4         | 7714.2000 |            | 0.0006     |                  |                                  |

**Table S49.** Measured frequencies and residuals (in MHz) of the rotational transitions of the (H<sub>2</sub><sup>18</sup>O) (H<sub>2</sub><sup>18</sup>O) isotopologue of isomer 6 E/ Qa-4-I.

|   |   |   | $J'$ | $K'_{-1}$ | $K'_{+1}$ | $J''$     | $K''_{-1}$ | $K''_{+1}$ | $V_{\text{obs}}$ | $V_{\text{obs}}-V_{\text{calc}}$ |
|---|---|---|------|-----------|-----------|-----------|------------|------------|------------------|----------------------------------|
| 3 | 1 | 3 | 2    | 1         | 2         | 2915.2068 |            | -0.0099    |                  |                                  |
| 3 | 0 | 3 | 2    | 0         | 2         | 3011.7325 |            | 0.0038     |                  |                                  |
| 3 | 1 | 2 | 2    | 1         | 1         | 3267.7930 |            | 0.0038     |                  |                                  |
| 4 | 1 | 4 | 3    | 1         | 3         | 3863.9239 |            | -0.0012    |                  |                                  |
| 4 | 0 | 4 | 3    | 0         | 3         | 3936.4427 |            | 0.0002     |                  |                                  |
| 4 | 2 | 3 | 3    | 2         | 2         | 4123.7025 |            | 0.0142     |                  |                                  |
| 4 | 1 | 3 | 3    | 1         | 2         | 4317.7972 |            | -0.0120    |                  |                                  |
| 4 | 2 | 2 | 3    | 2         | 1         | 4330.8945 |            | -0.0001    |                  |                                  |
| 5 | 2 | 4 | 4    | 2         | 3         | 5122.7891 |            | -0.0004    |                  |                                  |
| 5 | 1 | 4 | 4    | 1         | 3         | 5326.0005 |            | 0.0022     |                  |                                  |
| 6 | 2 | 4 | 5    | 2         | 3         | 6554.9380 |            | -0.0011    |                  |                                  |

**Table S50.** Measured frequencies and residuals (in MHz) of the rotational transitions of the parent species of **isomer 7 / EQA-2-I**.

|   |   |   | $J'$ | $K'_{-1}$ | $K'_{+1}$ | $J''$     | $K''_{-1}$ | $K''_{+1}$ | $V_{\text{obs}}$ | $V_{\text{obs}}-V_{\text{calc}}$ |
|---|---|---|------|-----------|-----------|-----------|------------|------------|------------------|----------------------------------|
| 2 | 1 | 1 | 1    | 0         | 1         | 2664.4870 |            | 0.0056     |                  |                                  |
| 3 | 1 | 3 | 2    | 1         | 2         | 2689.7257 |            | -0.0006    |                  |                                  |
| 3 | 0 | 3 | 2    | 0         | 2         | 2809.2456 |            | -0.0004    |                  |                                  |
| 3 | 2 | 2 | 2    | 2         | 1         | 2917.4929 |            | 0.0003     |                  |                                  |
| 3 | 2 | 1 | 2    | 2         | 0         | 3025.7391 |            | -0.0002    |                  |                                  |
| 3 | 1 | 2 | 2    | 1         | 1         | 3108.4437 |            | -0.0011    |                  |                                  |
| 2 | 2 | 0 | 1    | 1         | 0         | 3428.0896 |            | -0.0122    |                  |                                  |
| 4 | 0 | 4 | 3    | 1         | 3         | 3447.3140 |            | -0.0065    |                  |                                  |
| 2 | 2 | 1 | 1    | 1         | 1         | 3540.0743 |            | -0.0040    |                  |                                  |
| 4 | 1 | 4 | 3    | 1         | 3         | 3560.2037 |            | 0.0015     |                  |                                  |
| 2 | 2 | 0 | 1    | 1         | 1         | 3568.9364 |            | -0.0034    |                  |                                  |
| 4 | 0 | 4 | 3    | 0         | 3         | 3653.6341 |            | 0.0025     |                  |                                  |
| 4 | 1 | 4 | 3    | 0         | 3         | 3766.5226 |            | 0.0094     |                  |                                  |
| 4 | 2 | 3 | 3    | 2         | 2         | 3867.2938 |            | -0.0032    |                  |                                  |
| 4 | 3 | 2 | 3    | 3         | 1         | 3938.0904 |            | 0.0069     |                  |                                  |
| 4 | 3 | 1 | 3    | 3         | 0         | 3960.1730 |            | 0.0028     |                  |                                  |
| 4 | 1 | 3 | 3    | 1         | 2         | 4101.4544 |            | -0.0027    |                  |                                  |
| 4 | 2 | 2 | 3    | 2         | 1         | 4103.2298 |            | -0.0025    |                  |                                  |
| 5 | 0 | 5 | 4    | 1         | 4         | 4361.3692 |            | 0.0001     |                  |                                  |
| 3 | 2 | 1 | 2    | 1         | 1         | 4367.9952 |            | -0.0090    |                  |                                  |
| 5 | 1 | 5 | 4    | 1         | 4         | 4416.7249 |            | 0.0013     |                  |                                  |
| 5 | 0 | 5 | 4    | 0         | 4         | 4474.2493 |            | -0.0015    |                  |                                  |
| 5 | 1 | 5 | 4    | 0         | 4         | 4529.6119 |            | 0.0066     |                  |                                  |
| 3 | 2 | 1 | 2    | 1         | 2         | 4790.5170 |            | -0.0002    |                  |                                  |
| 5 | 2 | 4 | 4    | 2         | 3         | 4798.5555 |            | 0.0007     |                  |                                  |
| 5 | 3 | 3 | 4    | 3         | 2         | 4928.5414 |            | 0.0013     |                  |                                  |
| 5 | 3 | 2 | 4    | 3         | 1         | 5000.9558 |            | 0.0001     |                  |                                  |
| 5 | 1 | 4 | 4    | 1         | 3         | 5048.4358 |            | -0.0012    |                  |                                  |
| 5 | 2 | 3 | 4    | 2         | 2         | 5183.5247 |            | -0.0025    |                  |                                  |
| 6 | 0 | 6 | 5    | 1         | 5         | 5237.3872 |            | -0.0032    |                  |                                  |
| 6 | 1 | 6 | 5    | 1         | 5         | 5262.5961 |            | -0.0059    |                  |                                  |
| 6 | 0 | 6 | 5    | 0         | 5         | 5292.7428 |            | -0.0020    |                  |                                  |
| 6 | 1 | 6 | 5    | 0         | 5         | 5317.9540 |            | -0.0024    |                  |                                  |
| 4 | 2 | 2 | 3    | 1         | 2         | 5362.8103 |            | 0.0185     |                  |                                  |
| 3 | 3 | 1 | 2    | 2         | 1         | 5475.0398 |            | -0.0079    |                  |                                  |
| 6 | 2 | 5 | 5    | 2         | 4         | 5708.7046 |            | -0.0035    |                  |                                  |
| 4 | 2 | 3 | 3    | 1         | 3         | 5830.9701 |            | -0.0095    |                  |                                  |
| 6 | 3 | 4 | 5    | 3         | 3         | 5911.3285 |            | 0.0010     |                  |                                  |
| 6 | 4 | 3 | 5    | 4         | 2         | 5928.7734 |            | 0.0020     |                  |                                  |
| 6 | 1 | 5 | 5    | 1         | 4         | 5936.6738 |            | 0.0005     |                  |                                  |
| 6 | 4 | 2 | 5    | 4         | 1         | 5942.8097 |            | -0.0047    |                  |                                  |
| 6 | 3 | 3 | 5    | 3         | 2         | 6081.8386 |            | -0.0119    |                  |                                  |
| 7 | 0 | 7 | 6    | 1         | 6         | 6090.6806 |            | 0.0203     |                  |                                  |
| 7 | 1 | 7 | 6    | 1         | 6         | 6101.5869 |            | 0.0007     |                  |                                  |
| 7 | 0 | 7 | 6    | 0         | 6         | 6115.8702 |            | -0.0017    |                  |                                  |
| 4 | 2 | 2 | 3    | 1         | 3         | 6204.0452 |            | 0.0221     |                  |                                  |
| 6 | 2 | 4 | 5    | 2         | 3         | 6236.8222 |            | -0.0109    |                  |                                  |
| 4 | 3 | 1 | 3    | 2         | 1         | 6384.3985 |            | -0.0100    |                  |                                  |
| 5 | 2 | 3 | 4    | 1         | 3         | 6444.8551 |            | -0.0067    |                  |                                  |
| 4 | 3 | 2 | 3    | 2         | 2         | 6495.6367 |            | -0.0019    |                  |                                  |
| 5 | 1 | 4 | 4    | 0         | 4         | 6543.8011 |            | -0.0039    |                  |                                  |
| 7 | 2 | 6 | 6    | 2         | 5         | 6597.4697 |            | 0.0029     |                  |                                  |

|   |   |   |   |   |   |           |         |
|---|---|---|---|---|---|-----------|---------|
| 7 | 1 | 6 | 6 | 1 | 5 | 6771.7009 | 0.0018  |
| 7 | 3 | 5 | 6 | 3 | 4 | 6879.3607 | 0.0103  |
| 8 | 1 | 8 | 7 | 1 | 7 | 6936.6725 | 0.0035  |
| 8 | 0 | 8 | 7 | 0 | 7 | 6943.0046 | -0.0187 |
| 5 | 3 | 2 | 4 | 2 | 2 | 7282.1441 | 0.0122  |
| 5 | 3 | 3 | 4 | 2 | 3 | 7556.8899 | 0.0080  |
| 8 | 1 | 7 | 7 | 1 | 6 | 7579.3905 | 0.0038  |

**Table S51.** Measured frequencies and residuals (in MHz) of the rotational transitions of the (H<sub>2</sub><sup>18</sup>O) (H<sub>2</sub><sup>16</sup>O) isotopologue of isomer 7 / EQA-2-I.

|   |   |   | $J'$ | $K'_{-1}$ | $K'_{+1}$ | $J''$     | $K''_{-1}$ | $K''_{+1}$ | $\nu_{\text{obs}}$ | $\nu_{\text{obs}}-\nu_{\text{calc}}$ |
|---|---|---|------|-----------|-----------|-----------|------------|------------|--------------------|--------------------------------------|
| 3 | 0 | 3 | 2    | 0         | 2         | 2753.4052 |            | -0.0097    |                    |                                      |
| 3 | 1 | 2 | 2    | 1         | 1         | 3042.8153 |            | -0.0086    |                    |                                      |
| 4 | 1 | 4 | 3    | 1         | 3         | 3488.5501 |            | -0.0016    |                    |                                      |
| 4 | 0 | 4 | 3    | 0         | 3         | 3582.5004 |            | -0.0005    |                    |                                      |
| 4 | 2 | 3 | 3    | 2         | 2         | 3787.0306 |            | 0.0056     |                    |                                      |
| 4 | 3 | 1 | 3    | 3         | 0         | 3874.7949 |            | 0.0065     |                    |                                      |
| 4 | 2 | 2 | 3    | 2         | 1         | 4012.6872 |            | 0.0034     |                    |                                      |
| 4 | 1 | 3 | 3    | 1         | 2         | 4016.4181 |            | 0.0013     |                    |                                      |
| 5 | 1 | 5 | 4    | 1         | 4         | 4328.4958 |            | -0.0001    |                    |                                      |
| 5 | 0 | 5 | 4    | 0         | 4         | 4387.3972 |            | -0.0034    |                    |                                      |
| 5 | 2 | 4 | 4    | 2         | 3         | 4700.0244 |            | 0.0079     |                    |                                      |
| 5 | 3 | 3 | 4    | 3         | 2         | 4823.9963 |            | 0.0036     |                    |                                      |
| 5 | 2 | 3 | 4    | 2         | 2         | 5070.3444 |            | -0.0069    |                    |                                      |
| 6 | 1 | 6 | 5    | 1         | 5         | 5157.9998 |            | 0.0039     |                    |                                      |
| 6 | 0 | 6 | 5    | 0         | 5         | 5189.4207 |            | 0.0031     |                    |                                      |
| 6 | 2 | 5 | 5    | 2         | 4         | 5592.8653 |            | 0.0097     |                    |                                      |
| 6 | 3 | 4 | 5    | 3         | 3         | 5786.7020 |            | -0.0029    |                    |                                      |
| 6 | 1 | 5 | 5    | 1         | 4         | 5820.7278 |            | -0.0076    |                    |                                      |
| 6 | 3 | 3 | 5    | 3         | 2         | 5946.0365 |            | 0.0053     |                    |                                      |
| 7 | 1 | 7 | 6    | 1         | 6         | 5980.6090 |            | -0.0106    |                    |                                      |
| 7 | 0 | 7 | 6    | 0         | 6         | 5995.7616 |            | -0.0045    |                    |                                      |
| 6 | 2 | 4 | 5    | 2         | 3         | 6103.5155 |            | -0.0010    |                    |                                      |
| 7 | 2 | 6 | 6    | 2         | 5         | 6465.1062 |            | 0.0055     |                    |                                      |
| 7 | 1 | 6 | 6    | 1         | 5         | 6642.4894 |            | 0.0036     |                    |                                      |
| 8 | 0 | 8 | 7    | 0         | 7         | 6806.1277 |            | -0.0026    |                    |                                      |
| 7 | 2 | 5 | 6    | 2         | 4         | 7094.2436 |            | -0.0110    |                    |                                      |
| 8 | 1 | 7 | 7    | 1         | 6         | 7435.4480 |            | 0.0084     |                    |                                      |

**Table S52.** Measured frequencies and residuals (in MHz) of the rotational transitions of the (H<sub>2</sub><sup>16</sup>O) (H<sub>2</sub><sup>18</sup>O) isotopologue of isomer 7 / EQA-2-I.

|   |   |   | $J'$ | $K'_{-1}$ | $K'_{+1}$ | $J''$     | $K''_{-1}$ | $K''_{+1}$ | $\nu_{\text{obs}}$ | $\nu_{\text{obs}}-\nu_{\text{calc}}$ |
|---|---|---|------|-----------|-----------|-----------|------------|------------|--------------------|--------------------------------------|
| 3 | 1 | 3 | 2    | 1         | 2         | 2656.9559 |            | 0.0016     |                    |                                      |
| 3 | 0 | 3 | 2    | 0         | 2         | 2772.7014 |            | -0.0025    |                    |                                      |
| 3 | 1 | 2 | 2    | 1         | 1         | 3089.0904 |            | 0.0068     |                    |                                      |
| 4 | 1 | 4 | 3    | 1         | 3         | 3513.7324 |            | 0.0049     |                    |                                      |
| 4 | 0 | 4 | 3    | 0         | 3         | 3598.9514 |            | -0.0058    |                    |                                      |
| 4 | 2 | 3 | 3    | 2         | 2         | 3832.8547 |            | 0.0048     |                    |                                      |
| 4 | 3 | 1 | 3    | 3         | 0         | 3939.6731 |            | -0.0038    |                    |                                      |
| 4 | 1 | 3 | 3    | 1         | 2         | 4068.8022 |            | 0.0056     |                    |                                      |
| 4 | 2 | 2 | 3    | 2         | 1         | 4091.9396 |            | -0.0035    |                    |                                      |
| 5 | 1 | 5 | 4    | 1         | 4         | 4355.8547 |            | -0.0011    |                    |                                      |
| 5 | 0 | 5 | 4    | 0         | 4         | 4404.9011 |            | -0.0008    |                    |                                      |
| 5 | 2 | 4 | 4    | 2         | 3         | 4750.8717 |            | 0.0056     |                    |                                      |
| 5 | 3 | 2 | 4    | 3         | 1         | 4983.8150 |            | 0.0108     |                    |                                      |
| 5 | 1 | 4 | 4    | 1         | 3         | 4995.3148 |            | -0.0080    |                    |                                      |
| 5 | 2 | 3 | 4    | 2         | 2         | 5164.7846 |            | -0.0029    |                    |                                      |
| 6 | 1 | 6 | 5    | 1         | 5         | 5187.3879 |            | 0.0001     |                    |                                      |
| 6 | 2 | 5 | 5    | 2         | 4         | 5645.5881 |            | 0.0032     |                    |                                      |
| 6 | 1 | 5 | 5    | 1         | 4         | 5857.3998 |            | -0.0024    |                    |                                      |
| 6 | 3 | 4 | 5    | 3         | 3         | 5868.0014 |            | -0.0118    |                    |                                      |
| 7 | 1 | 7 | 6    | 1         | 6         | 6012.4646 |            | -0.0022    |                    |                                      |
| 7 | 0 | 7 | 6    | 0         | 6         | 6023.1706 |            | -0.0064    |                    |                                      |
| 6 | 2 | 4 | 5    | 2         | 3         | 6202.9052 |            | -0.0076    |                    |                                      |
| 7 | 2 | 6 | 6    | 2         | 5         | 6517.4440 |            | 0.0116     |                    |                                      |
| 7 | 1 | 6 | 6    | 1         | 5         | 6668.2691 |            | 0.0012     |                    |                                      |
| 7 | 3 | 5 | 6    | 3         | 4         | 6822.7795 |            | 0.0057     |                    |                                      |
| 7 | 3 | 4 | 6    | 3         | 3         | 7183.0594 |            | -0.0028    |                    |                                      |
| 7 | 2 | 5 | 6    | 2         | 4         | 7187.6068 |            | 0.0027     |                    |                                      |
| 8 | 1 | 7 | 7    | 1         | 6         | 7459.7191 |            | -0.0001    |                    |                                      |



**Table S53.** Measured frequencies and residuals (in MHz) of the rotational transitions of the (H<sub>2</sub><sup>18</sup>O) (H<sub>2</sub><sup>18</sup>O) isotopologue of isomer 7 / EQA-2-I.

|   |   |   | $J'$ | $K'_{-1}$ | $K'_{+1}$ | $J''$     | $K''_{-1}$ | $K''_{+1}$ | $\nu_{\text{obs}}$ | $\nu_{\text{obs}}-\nu_{\text{calc}}$ |
|---|---|---|------|-----------|-----------|-----------|------------|------------|--------------------|--------------------------------------|
| 3 | 1 | 3 | 2    | 1         | 2         | 2604.1390 |            | 0.0025     |                    |                                      |
| 3 | 1 | 2 | 2    | 1         | 1         | 3024.1563 |            | -0.0106    |                    |                                      |
| 4 | 1 | 4 | 3    | 1         | 3         | 3444.7291 |            | -0.0100    |                    |                                      |
| 4 | 0 | 4 | 3    | 0         | 3         | 3531.1300 |            | 0.0113     |                    |                                      |
| 4 | 1 | 3 | 3    | 1         | 2         | 3985.4531 |            | -0.0016    |                    |                                      |
| 5 | 1 | 5 | 4    | 1         | 4         | 4271.1717 |            | -0.0009    |                    |                                      |
| 5 | 0 | 5 | 4    | 0         | 4         | 4322.0183 |            | 0.0019     |                    |                                      |
| 5 | 2 | 4 | 4    | 2         | 3         | 4654.8509 |            | 0.0087     |                    |                                      |
| 5 | 3 | 3 | 4    | 3         | 2         | 4791.8707 |            | 0.0109     |                    |                                      |
| 5 | 3 | 2 | 4    | 3         | 1         | 4873.3122 |            | -0.0111    |                    |                                      |
| 5 | 1 | 4 | 4    | 1         | 3         | 4896.8981 |            | -0.0007    |                    |                                      |
| 5 | 2 | 3 | 4    | 2         | 2         | 5051.9994 |            | 0.0085     |                    |                                      |
| 6 | 1 | 6 | 5    | 1         | 5         | 5087.1632 |            | -0.0067    |                    |                                      |
| 6 | 2 | 5 | 5    | 2         | 4         | 5533.3117 |            | 0.0064     |                    |                                      |
| 6 | 1 | 5 | 5    | 1         | 4         | 5746.8043 |            | -0.0037    |                    |                                      |
| 7 | 1 | 7 | 6    | 1         | 6         | 5896.6708 |            | -0.0077    |                    |                                      |
| 7 | 0 | 7 | 6    | 0         | 6         | 5908.2599 |            | -0.0059    |                    |                                      |
| 6 | 2 | 4 | 5    | 2         | 3         | 6071.3533 |            | -0.0016    |                    |                                      |
| 7 | 2 | 6 | 6    | 2         | 5         | 6389.7795 |            | 0.0114     |                    |                                      |
| 7 | 1 | 6 | 6    | 1         | 5         | 6545.4971 |            | -0.0017    |                    |                                      |
| 7 | 3 | 5 | 6    | 3         | 4         | 6682.0073 |            | -0.0003    |                    |                                      |
| 8 | 1 | 8 | 7    | 1         | 7         | 6702.6812 |            | 0.0064     |                    |                                      |
| 7 | 2 | 5 | 6    | 2         | 4         | 7040.9602 |            | -0.0059    |                    |                                      |
| 8 | 1 | 7 | 7    | 1         | 6         | 7322.4620 |            | -0.0011    |                    |                                      |
